# Supplementary material for: Scalable Glassy X-Ray Scintillators with Bright Singlet-Triplet Hybrid Self-Trapping Excitons
Source: Research Square preprint supplement (doi:10.21203/rs.3.rs-3942722/v1), 2024-03-05
Supplement: Supplementary file 1 [file 358656c469b71c9143c81200.docx]

**Supplementary Materials**

**Scalable Glassy X-Ray Scintillators with Bright Singlet-Triplet Hybrid Self-Trapping Excitons**

Shi-Yu Song1,#, Chao-Jun Gao1,#, Rui Zhou1, Bing-Zhe Wang2,Wen-Bo Zhao1, Qing Cao1, Yan-Wei Hu1, Lin Dong1, Kai-Kai Liu1,✉ and Chong-Xin Shan1,✉

*1Henan Key Laboratory of Diamond Optoelectronic Materials and Devices, Key Laboratory of Material Physics Ministry of Education, School of Physics and Microelectronics, Zhengzhou University, Zhengzhou, P. R. China.*

*2**Joint Key Laboratory of the Ministry of Education, Institute of Applied Physics and Materials Engineering, University of Macau, Taipa, Macau SAR 999078, China*

*#These authors contributed equally to this work.*

*✉e-mail:* [*liukaikai@zzu.edu.cn*](mailto:liukaikai@zzu.edu.cn)*;* [*cxshan@zzu.edu.cn*](mailto:cxshan@zzu.edu.cn)*.*

**Contents**

[**Figure S1** The optical performance of the ZnO QD scintillator 3](#_Toc156918854)

[**Figure S2** TEM images of the vitreous QD scintillator in cross-section and top-view 3](#_Toc156918855)

[**Figure S3** ZnO QDs' size distribution 4](#_Toc156918856)

[**Figure S4** Absorption spectrum for the ZnO QDs 4](#_Toc156918857)

[**Figure S5** The theoretical calculation of Rayleigh scattering cross-section (σ) for the ZnO QDs at various wavelengths in water, ethanol, and SiO2 5](#_Toc156918858)

[**Figure S6** Photographs of the scintillator from opaque to transparent and by a schematic diagram elucidating the varied scattering effects 5](#_Toc156918859)

[**Figure S7** The surface of the ZnO QD vitreous scintillator captured in the SEM image 6](#_Toc156918860)

[**Figure S8** XRD pattern of the ZnO QD powders and ZnO QD vitreous scintillator 6](#_Toc156918861)

[**Figure S9** SEM images of the ZnO QD vitreous scintillator captured at various formation processes 7](#_Toc156918862)

[**Figure S10** TEM image of the ZnO QD vitreous scintillator 7](#_Toc156918863)

[**Figure S11** Absorbance, PL, and PL excitation spectra of ZnO QDs. Temperature-dependent PL spectra and FWHM emission of ZnO QDs 8](#_Toc156918864)

[**Figure S12** PL QY measurement spectra for the ZnO QD powders and the ZnO QD vitreous scintillator 8](#_Toc156918865)

[**Figure S13** Excitation-Emission Characteristics of the ZnO QD vitreous scintillator 9](#_Toc156918866)

[**Figure S14** Exciton binding energy fitting results of the ZnO QDs 9](#_Toc156918867)

[**Figure S15** The PL spectra of the ZnO QDs under varying laser powers 10](#_Toc156918868)

[**Figure S16** 3D time-resolved emission spectra and the PL lifetime changes of the ZnO QDs 10](#_Toc156918869)

[**Figure S17** The analysis results of temperature-dependent PL lifetime for the ZnO QDs 11](#_Toc156918870)

[**Figure S18** Temperature-dependent average lifetimes of the ZnO QDs 11](#_Toc156918871)

[**Figure S19** Global analysis TA spectra of the ZnO QDs 12](#_Toc156918872)

[**Figure S20** Calculated X-ray attenuation efficiencies for BGO, CsI:Tl, and ZnO with varying thicknesses. Also, absorption spectra of ZnO, Zn, Si, and O concerning X-ray energy 13](#_Toc156918873)

[**Figure S21** Simulated light intensity and measured light intensity in different directions at the same X-ray dose rate 13](#_Toc156918874)

[**Figure S22** RL stability of the ZnO QD vitreous scintillator 14](#_Toc156918875)

[**Figure S23** Cost/price comparison of the ZnO QD and other scintillators 14](#_Toc156918876)

[**Figure S24** Digital photograph and corresponding X-ray images using the ZnO QD scintillator 15](#_Toc156918877)


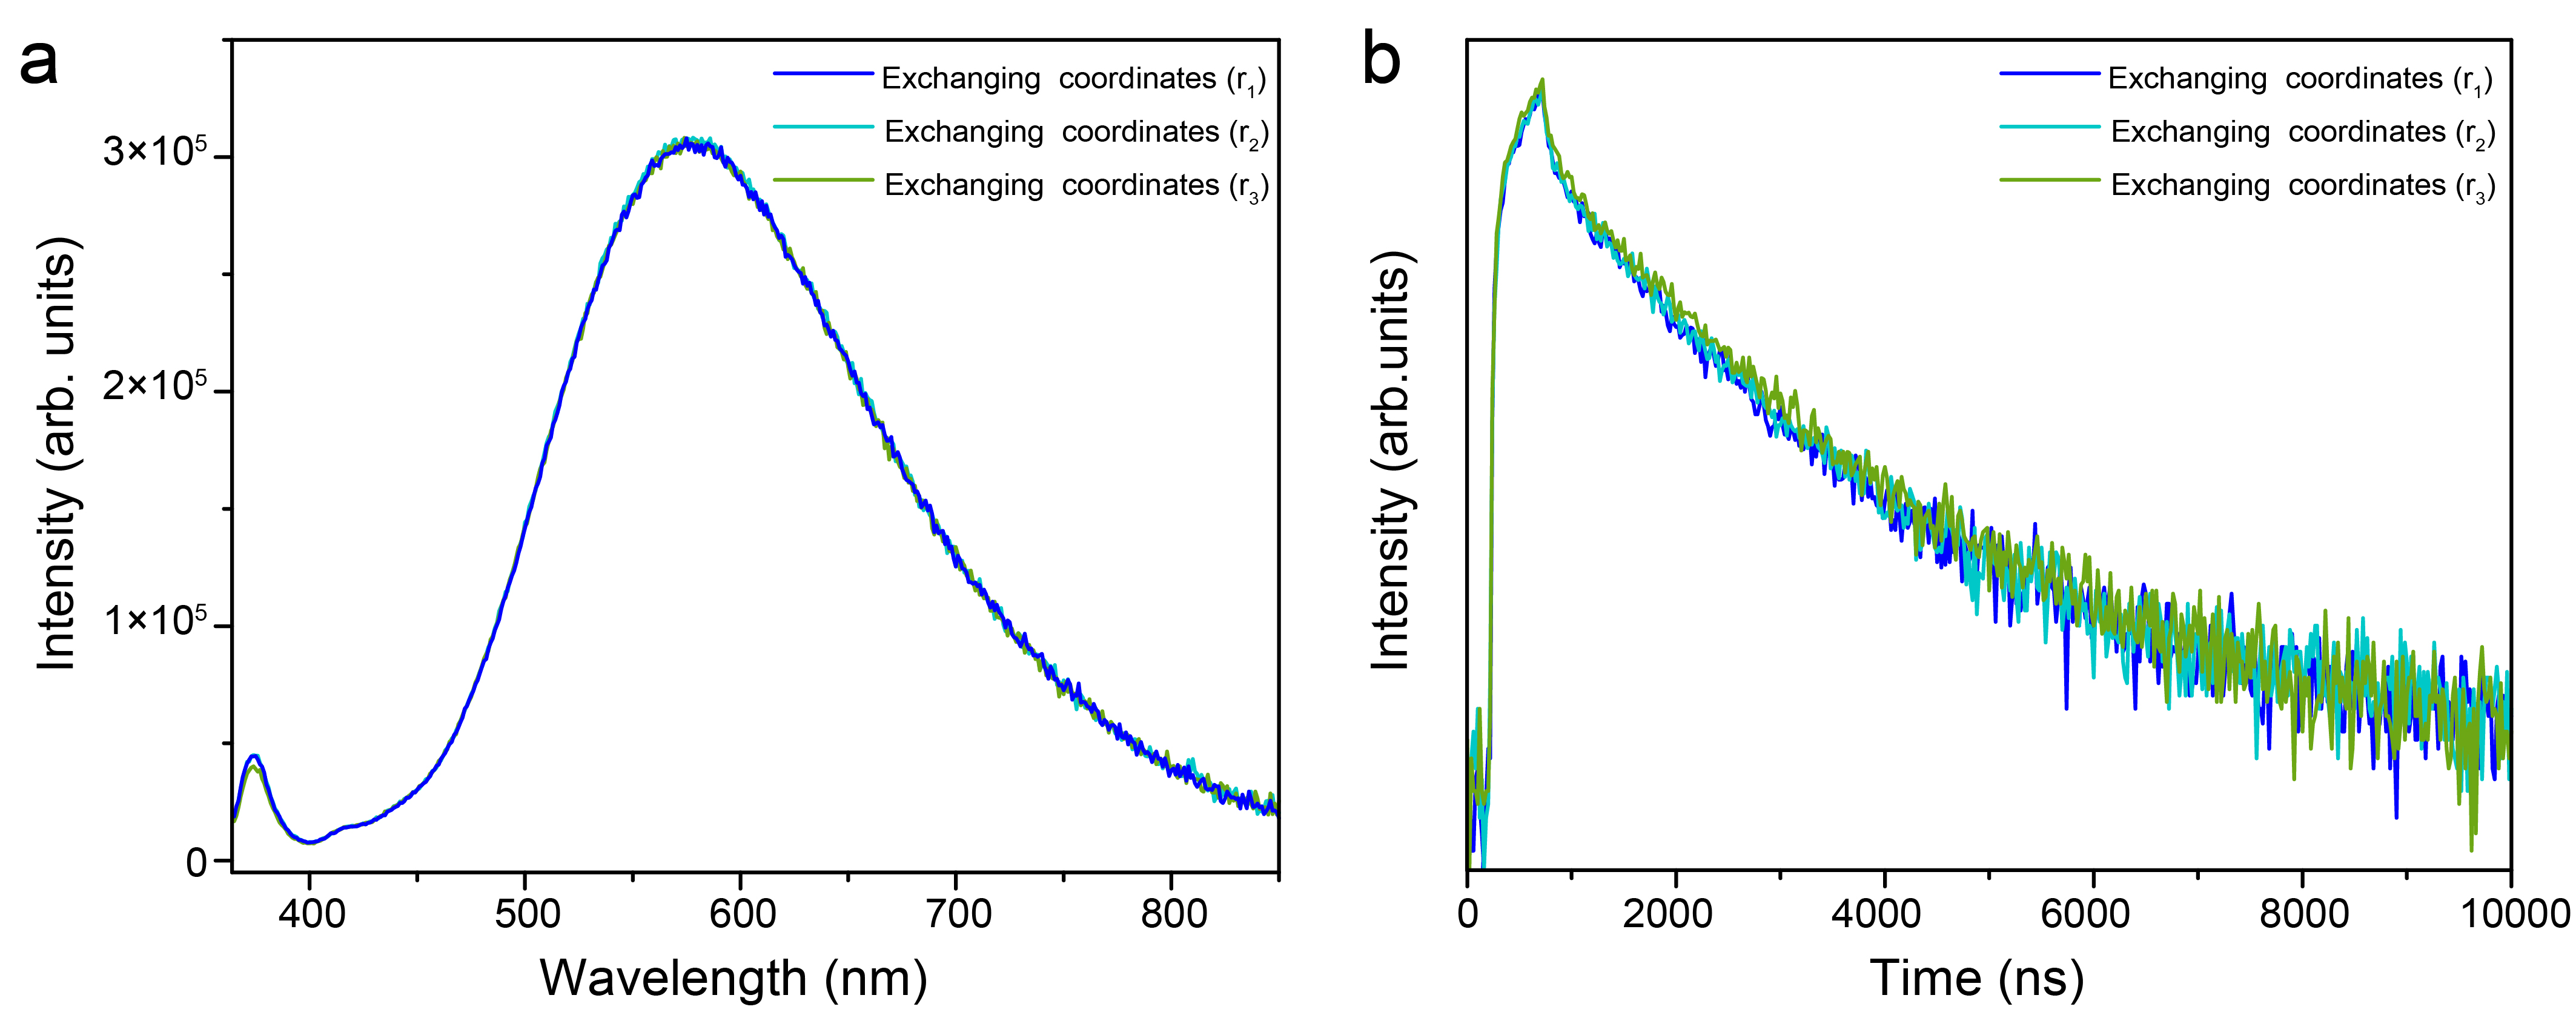


# Figure S1. (a) PL and (b) PL lifetime decay spectra of the ZnO QD scintillator after exchanging their coordinates (r).


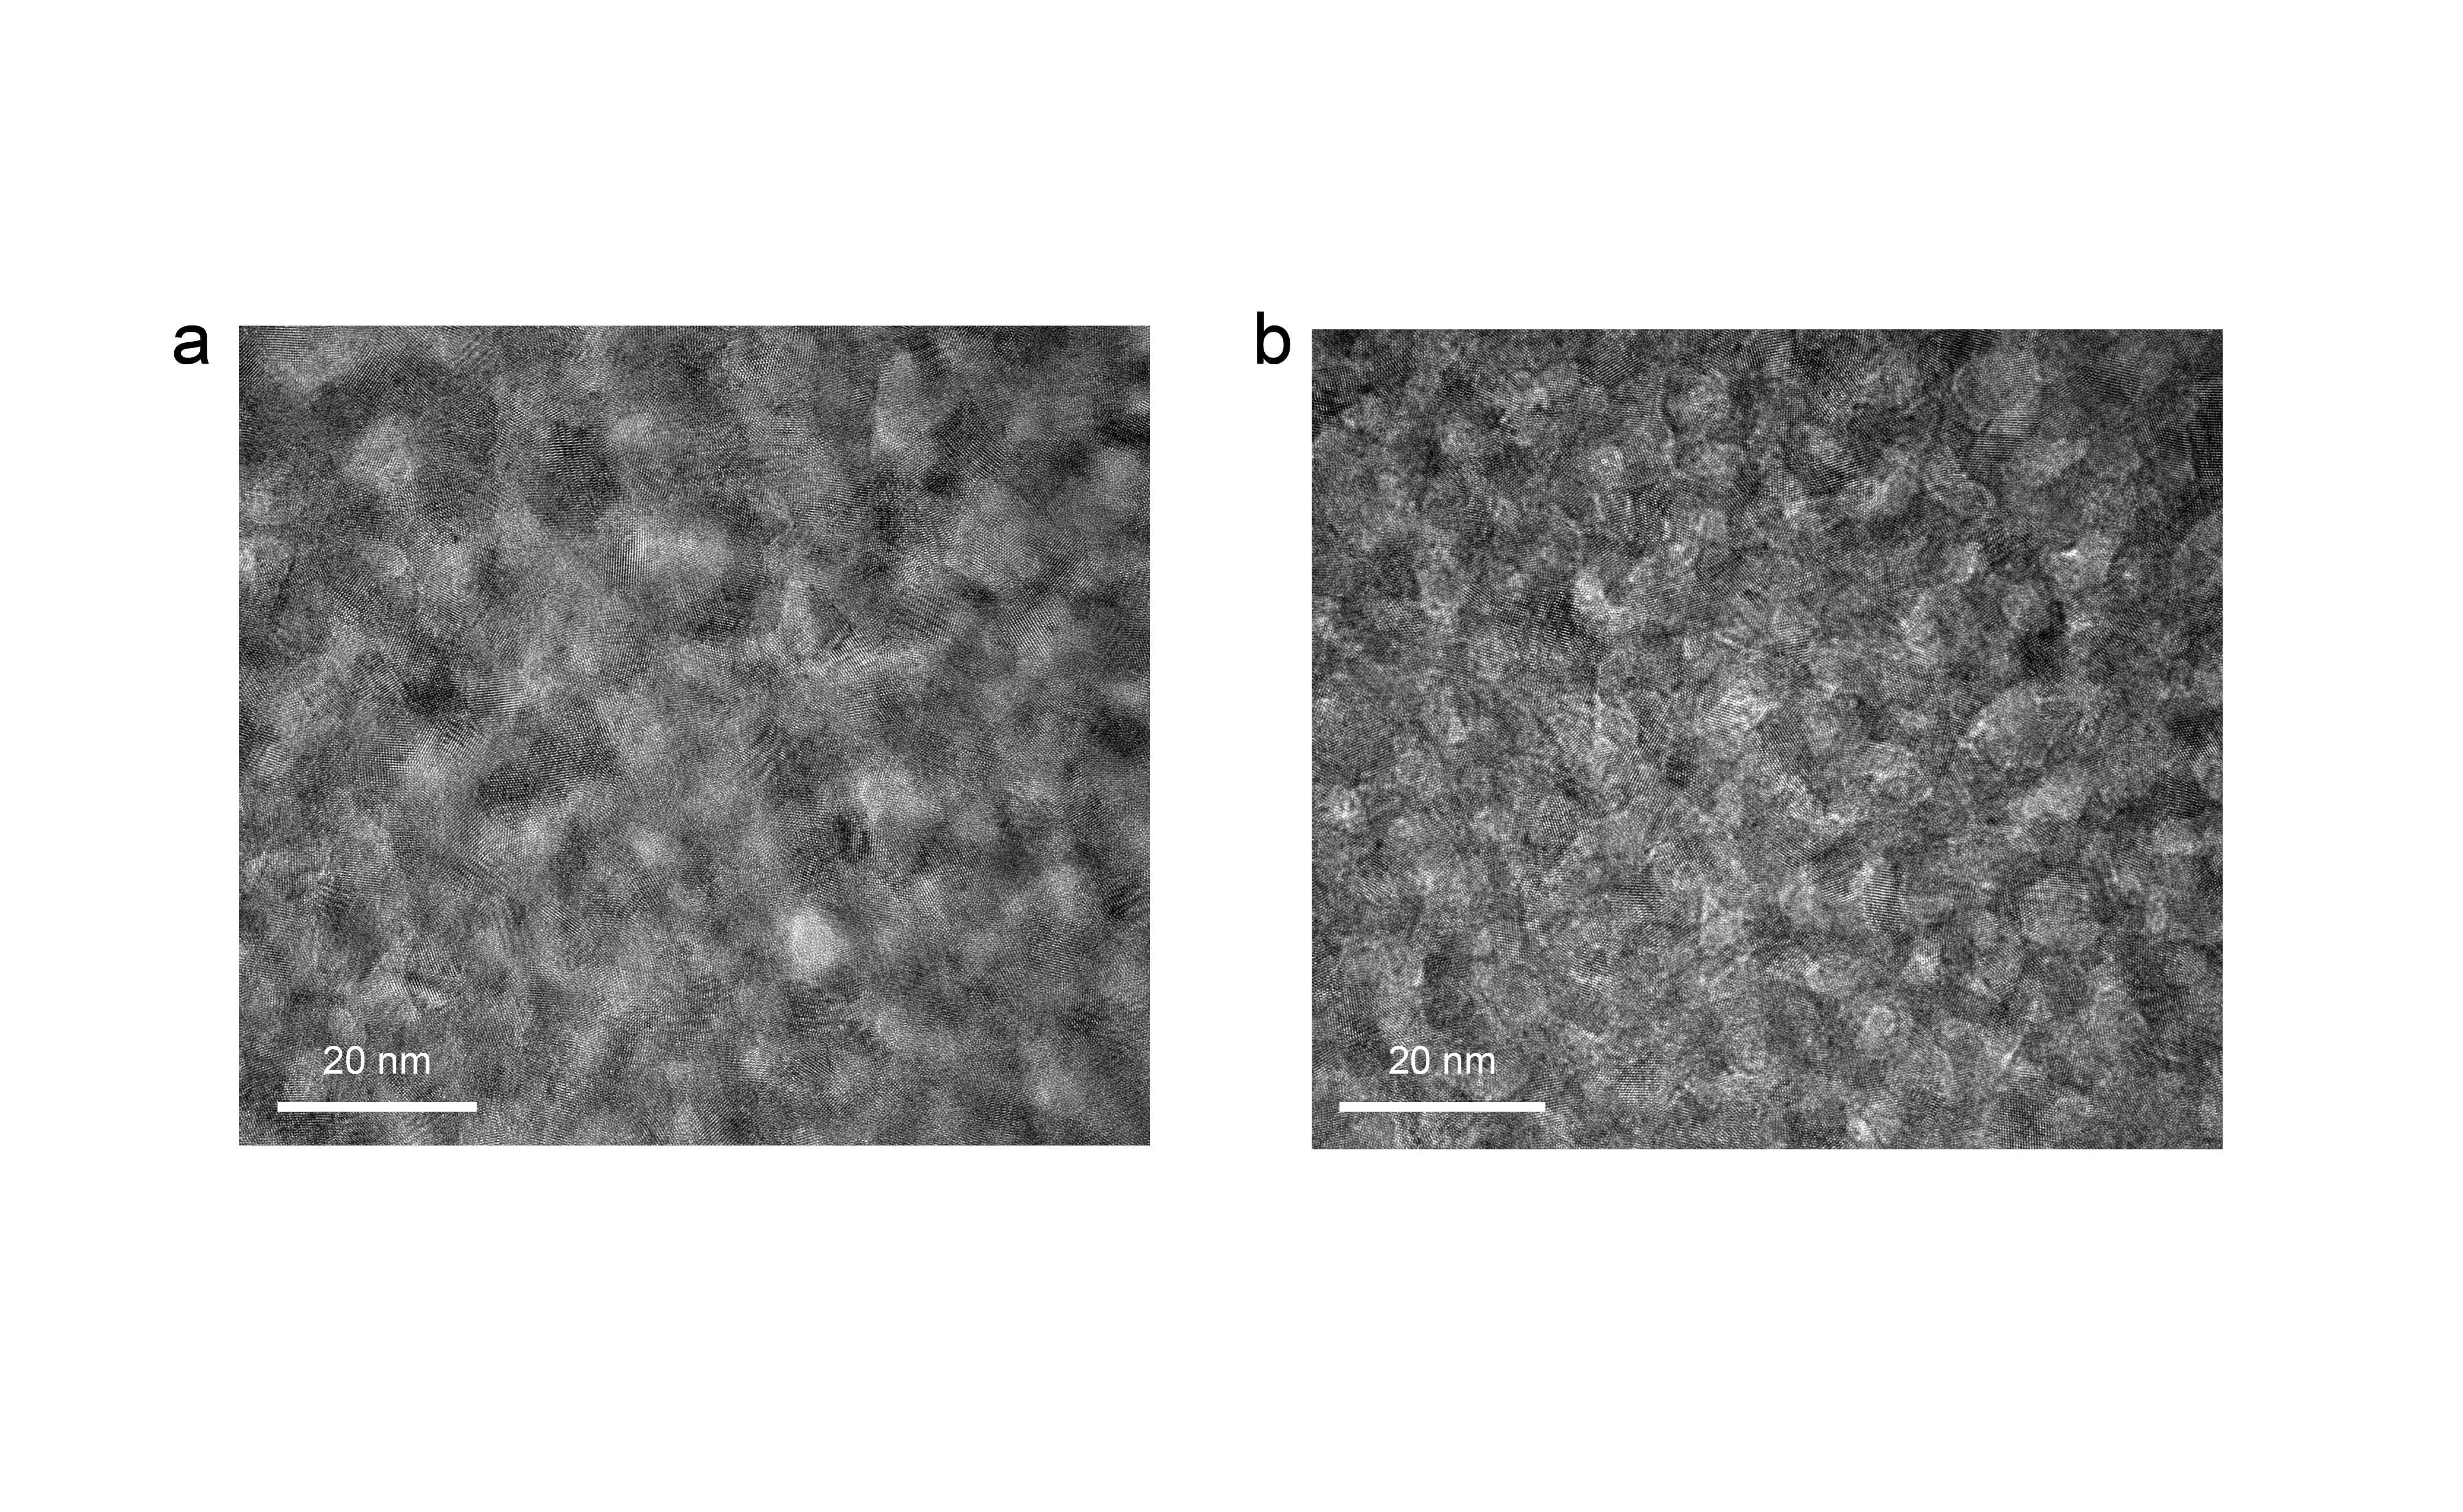


# Figure S2. (a) The cross-section and (b) top-view TEM images of the vitreous QD scintillator.


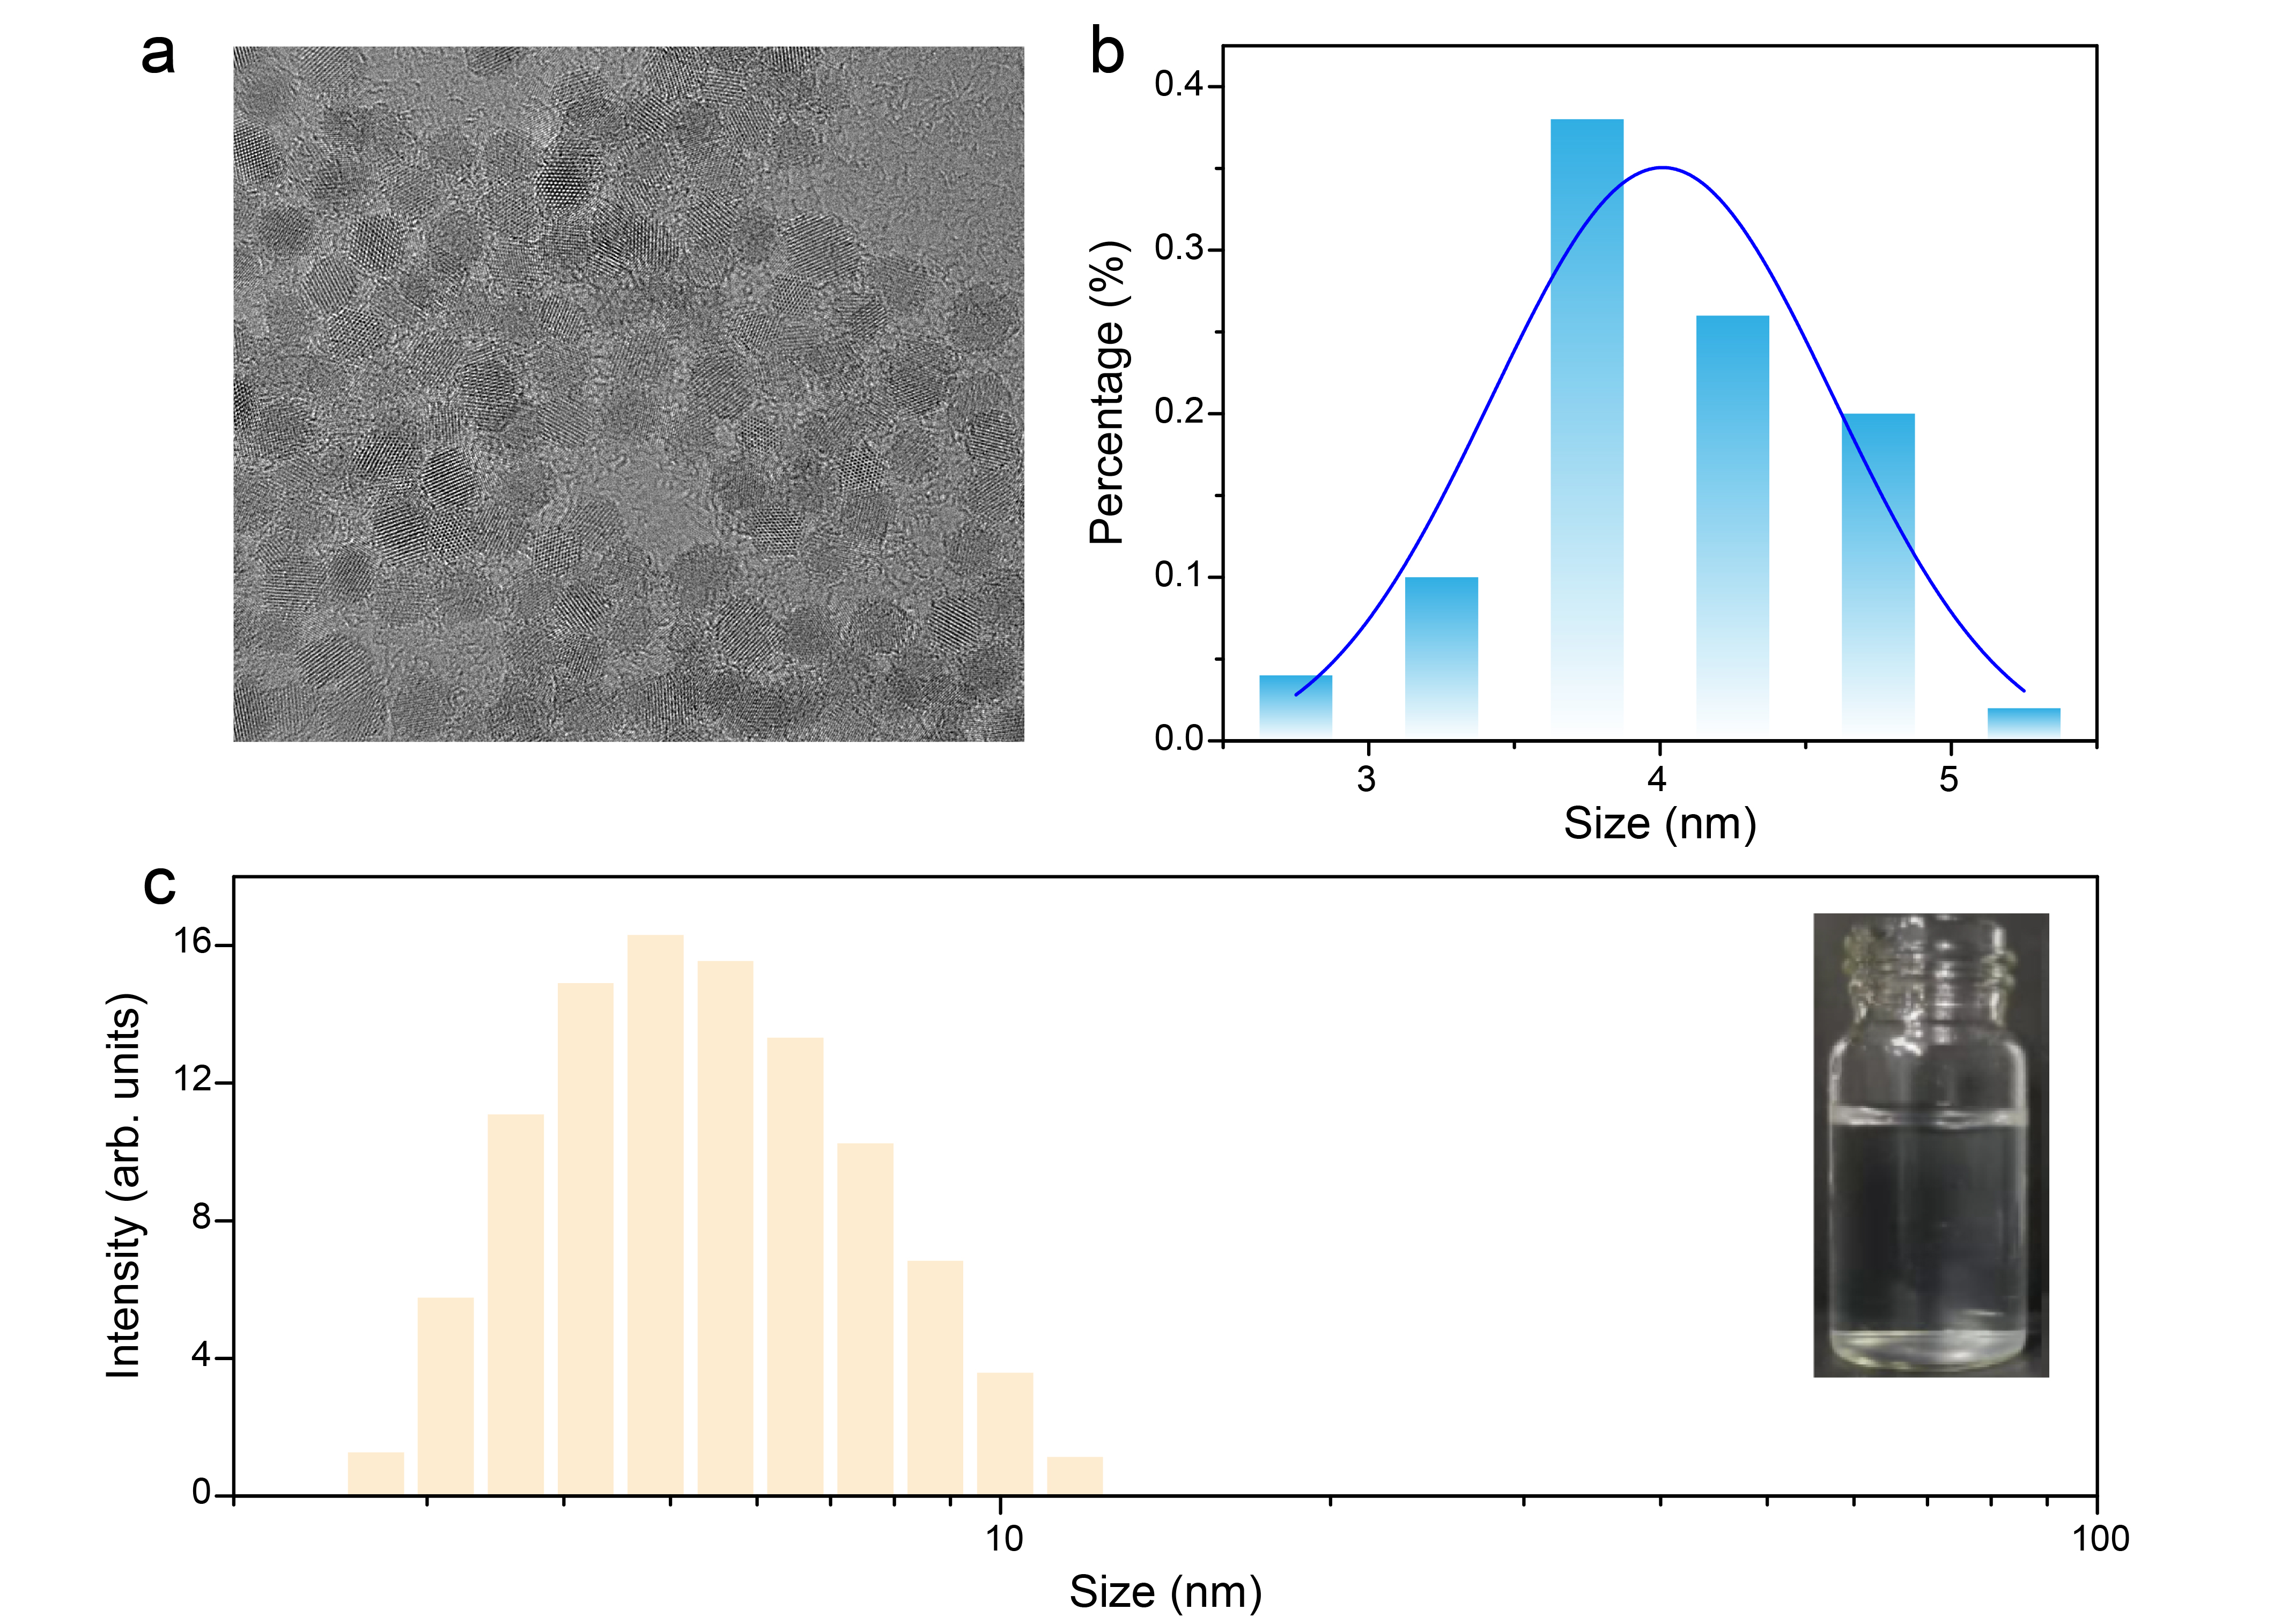


# Figure S3. (a) TEM image and (b) the size distribution of the ZnO QDs. (c) The size distribution of the ZnO QDs monitored by dynamic light scattering.


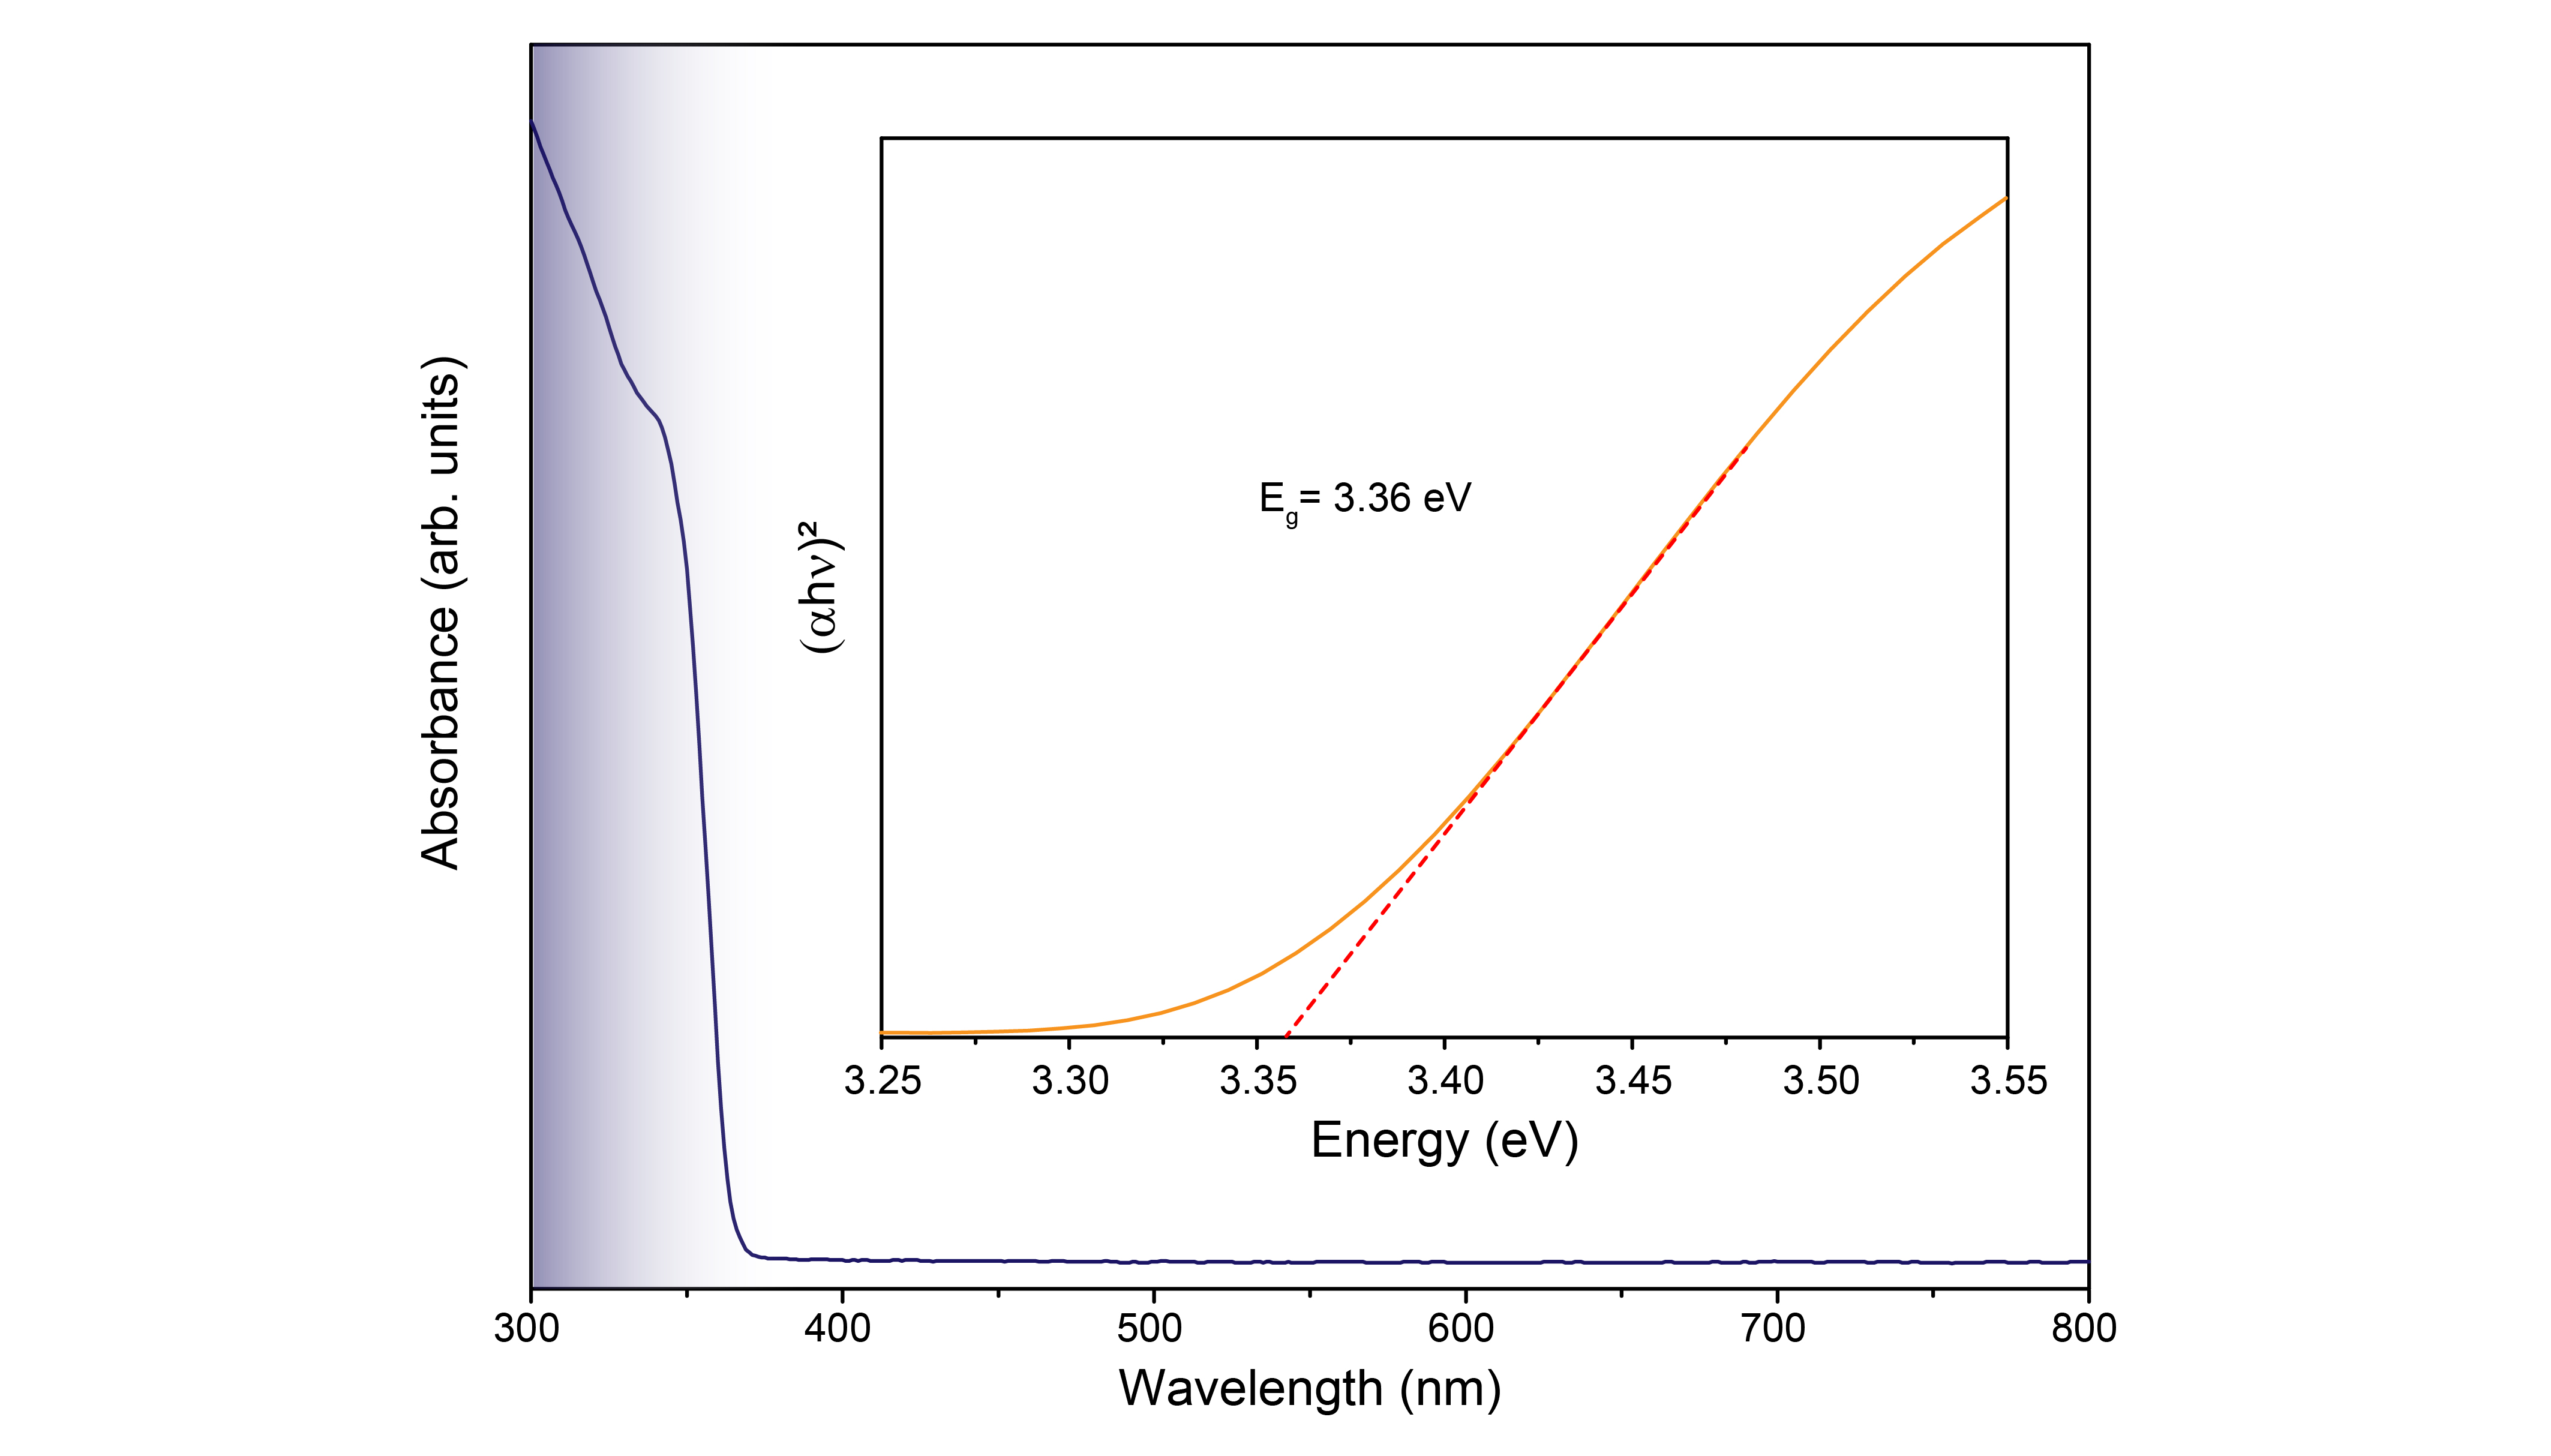


# Figure S4. Absorption spectrum for the ZnO QDs, the insert shows the band gap of the ZnO QDs.


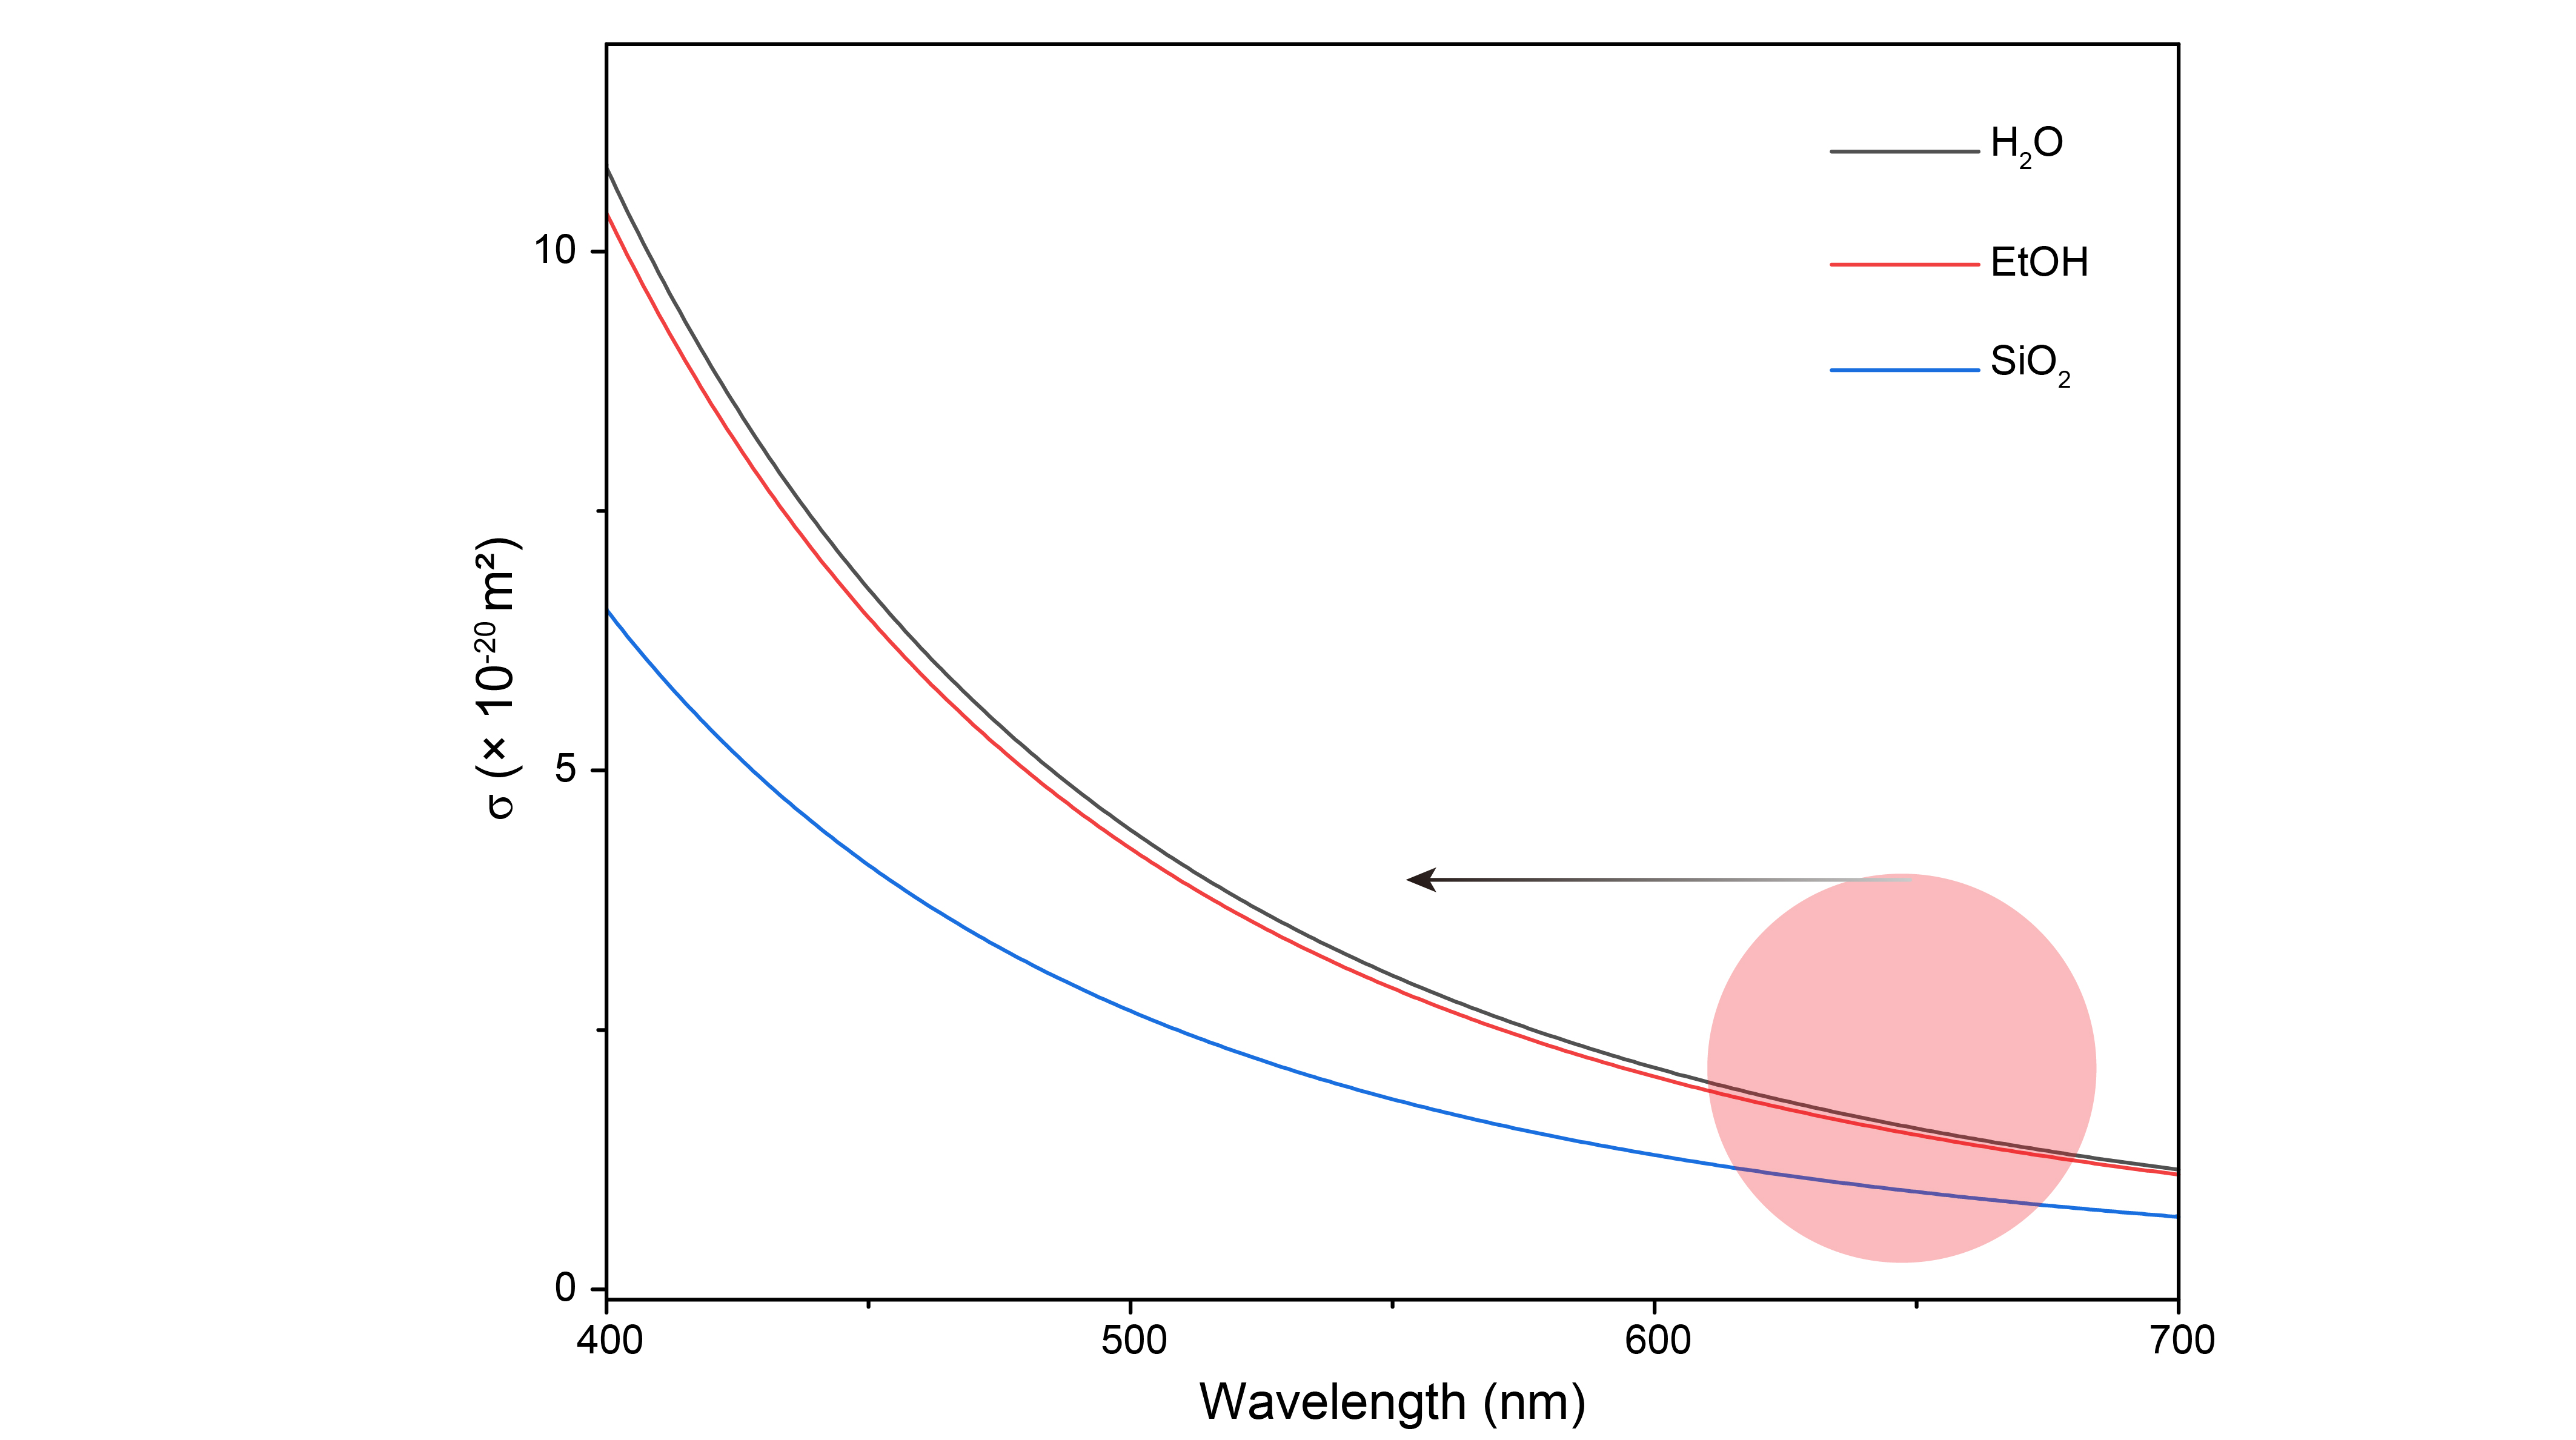


# Figure S5. Calculated Rayleigh scattering cross-section (σ) of the ZnO QDs versus wavelength, in water, ethyl alcohol and SiO2 matrix.


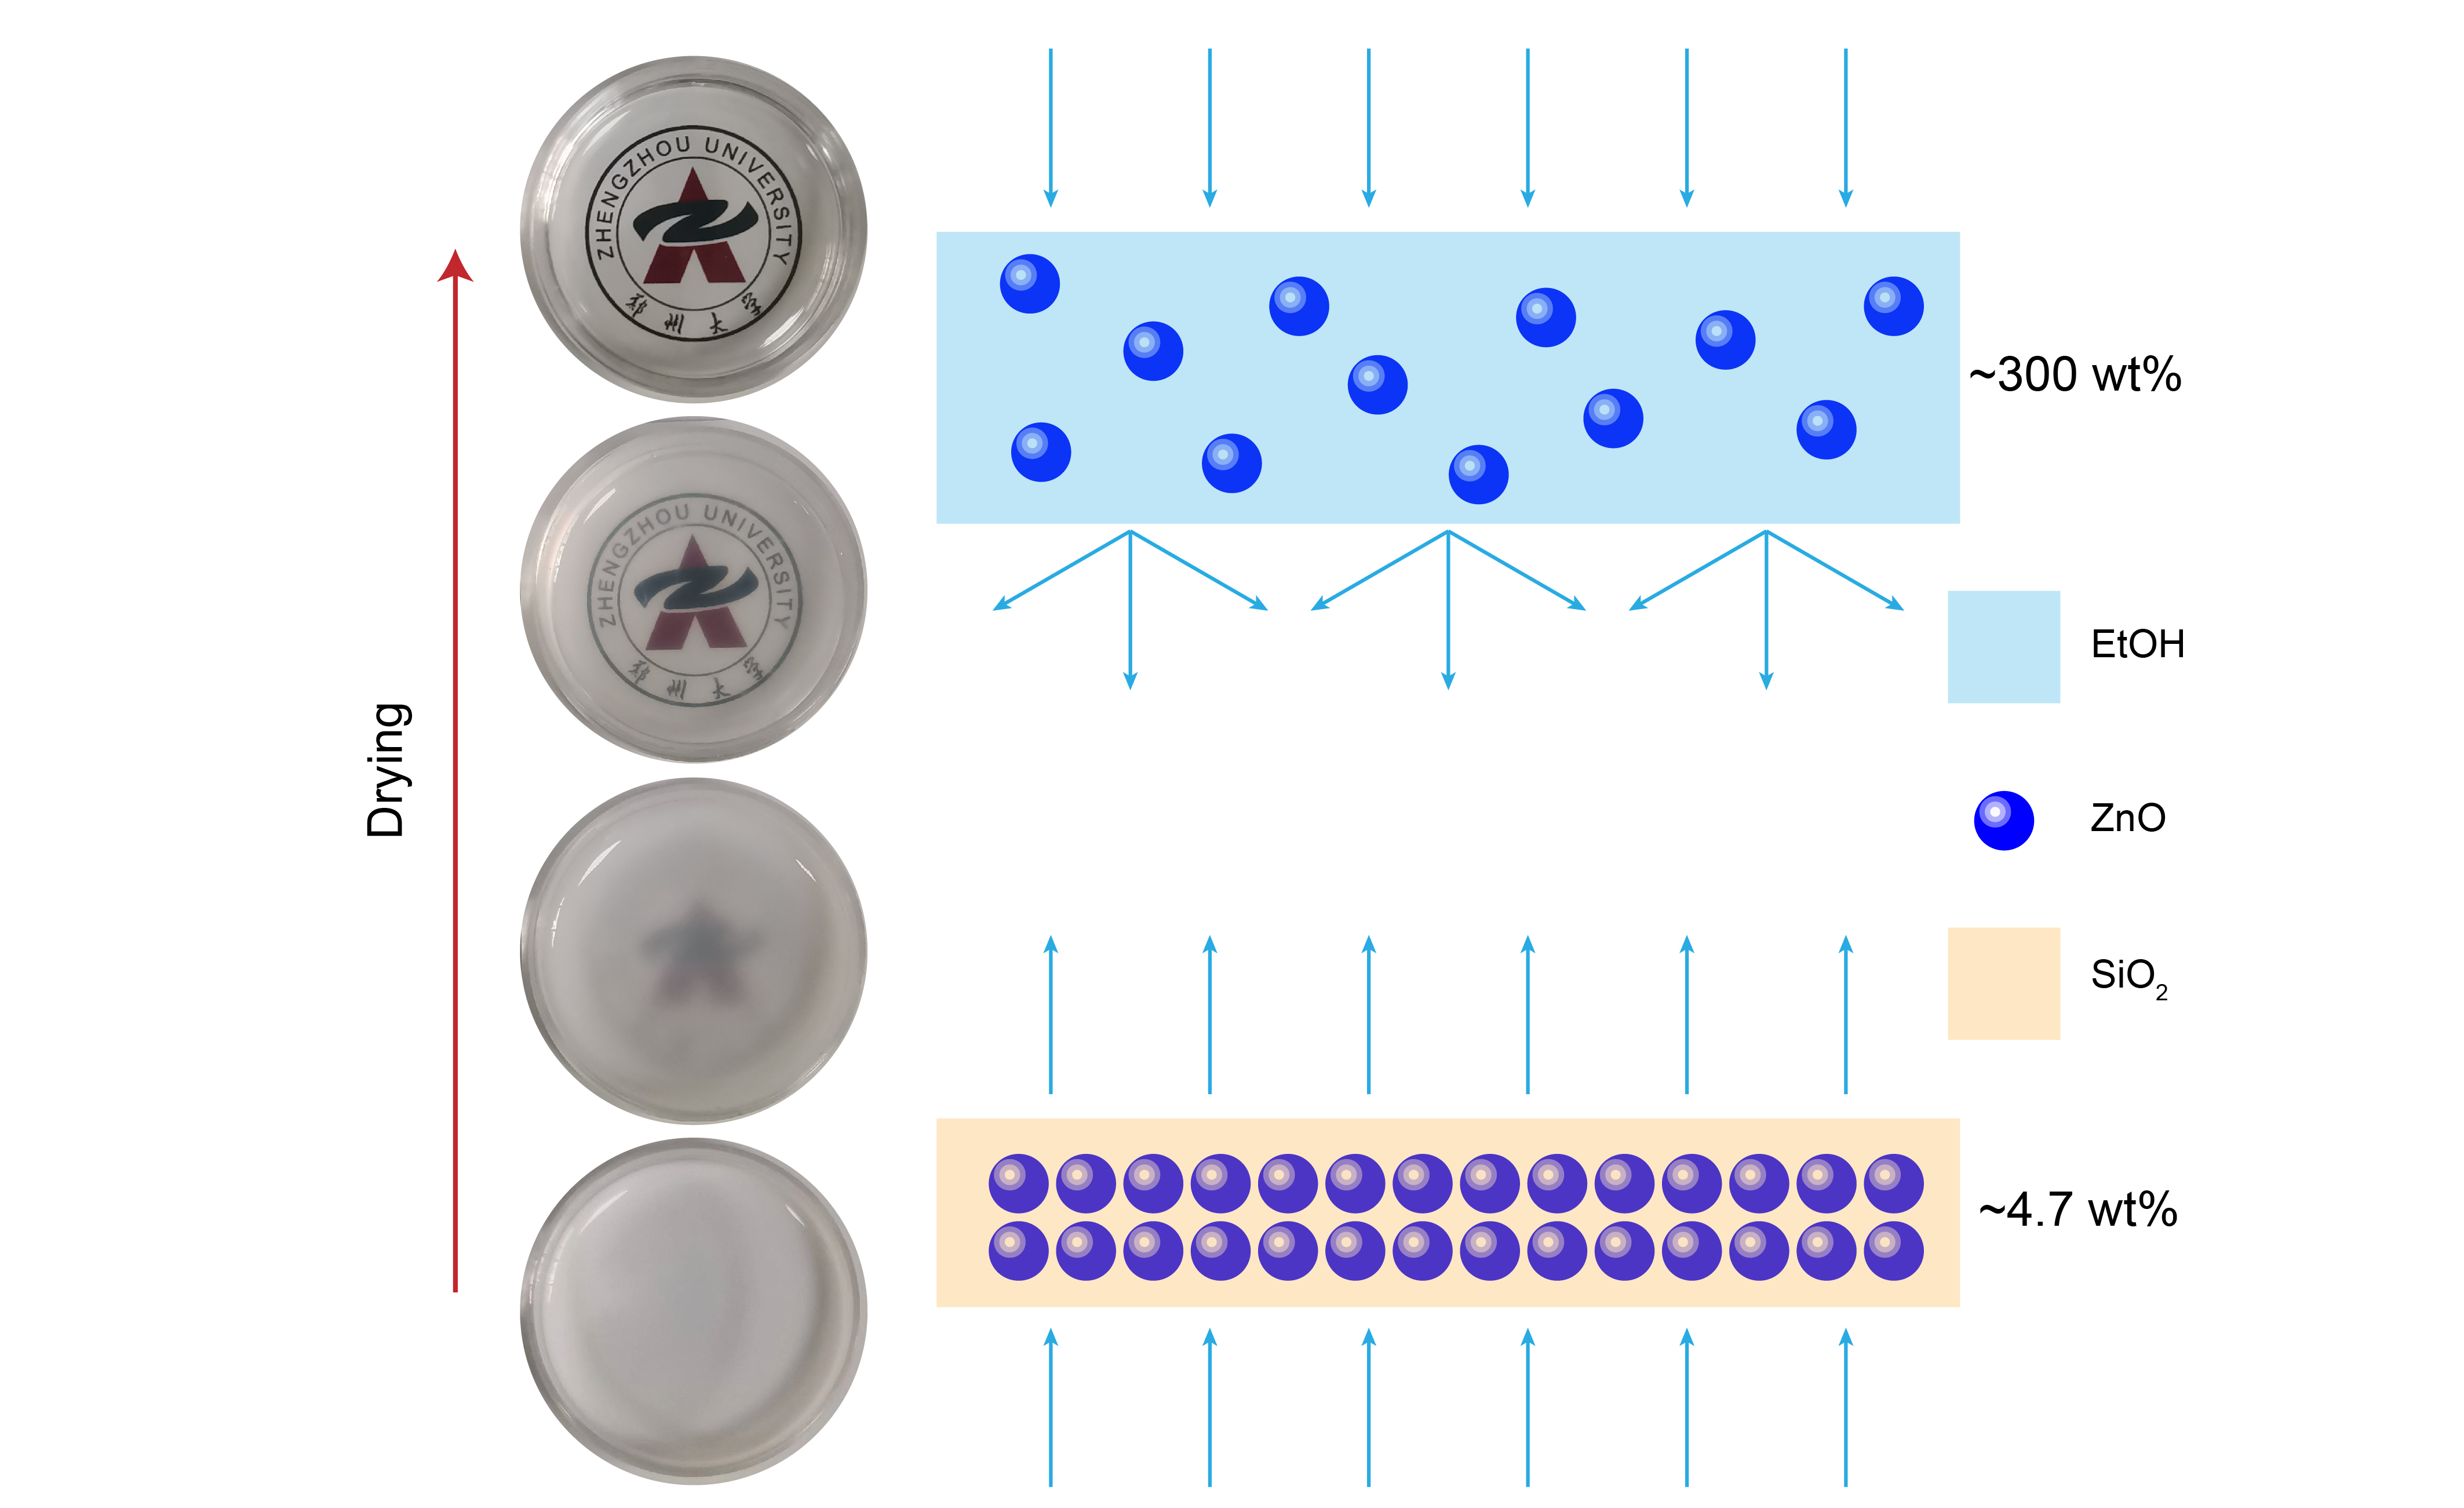


# Figure S6. Photographs of the scintillator from opaque-to-transparent (left), and the schematic diagram (right) of the varied scattering effect from two interfaces: EtOH/QDs and SiO2/ QDs.


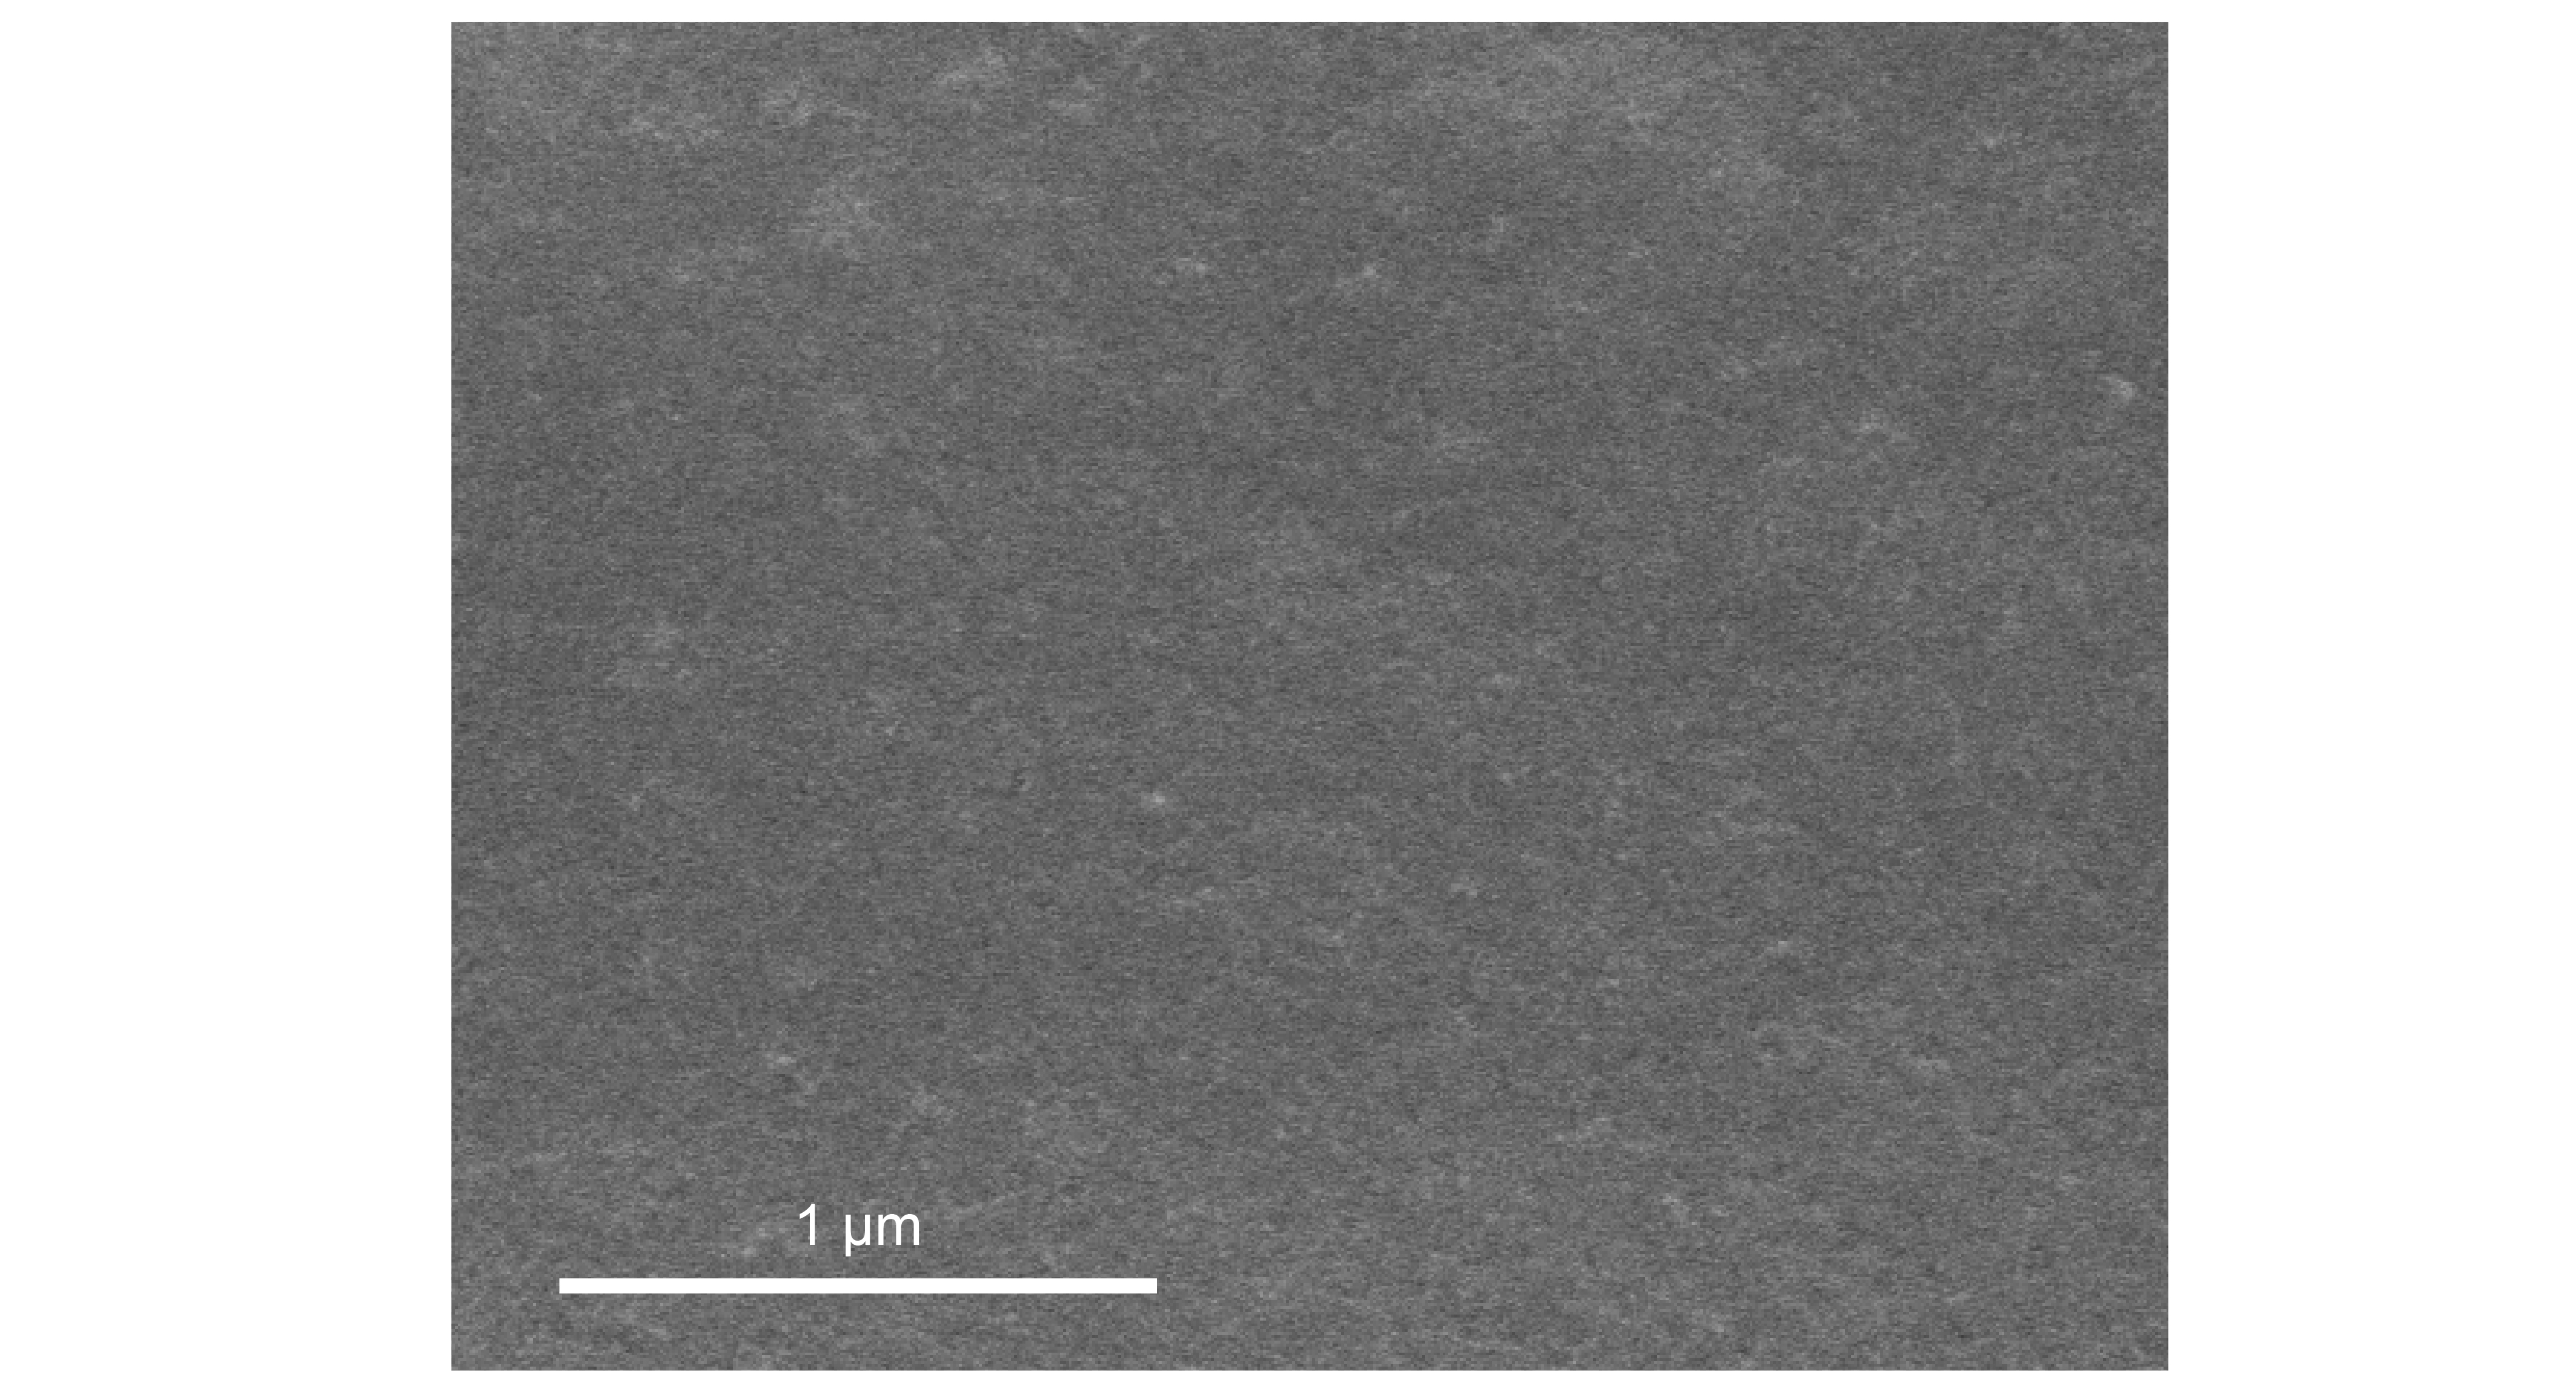


# Figure S7. Top-view scanning electron microscopy (SEM) image of the ZnO QD vitreous scintillator.


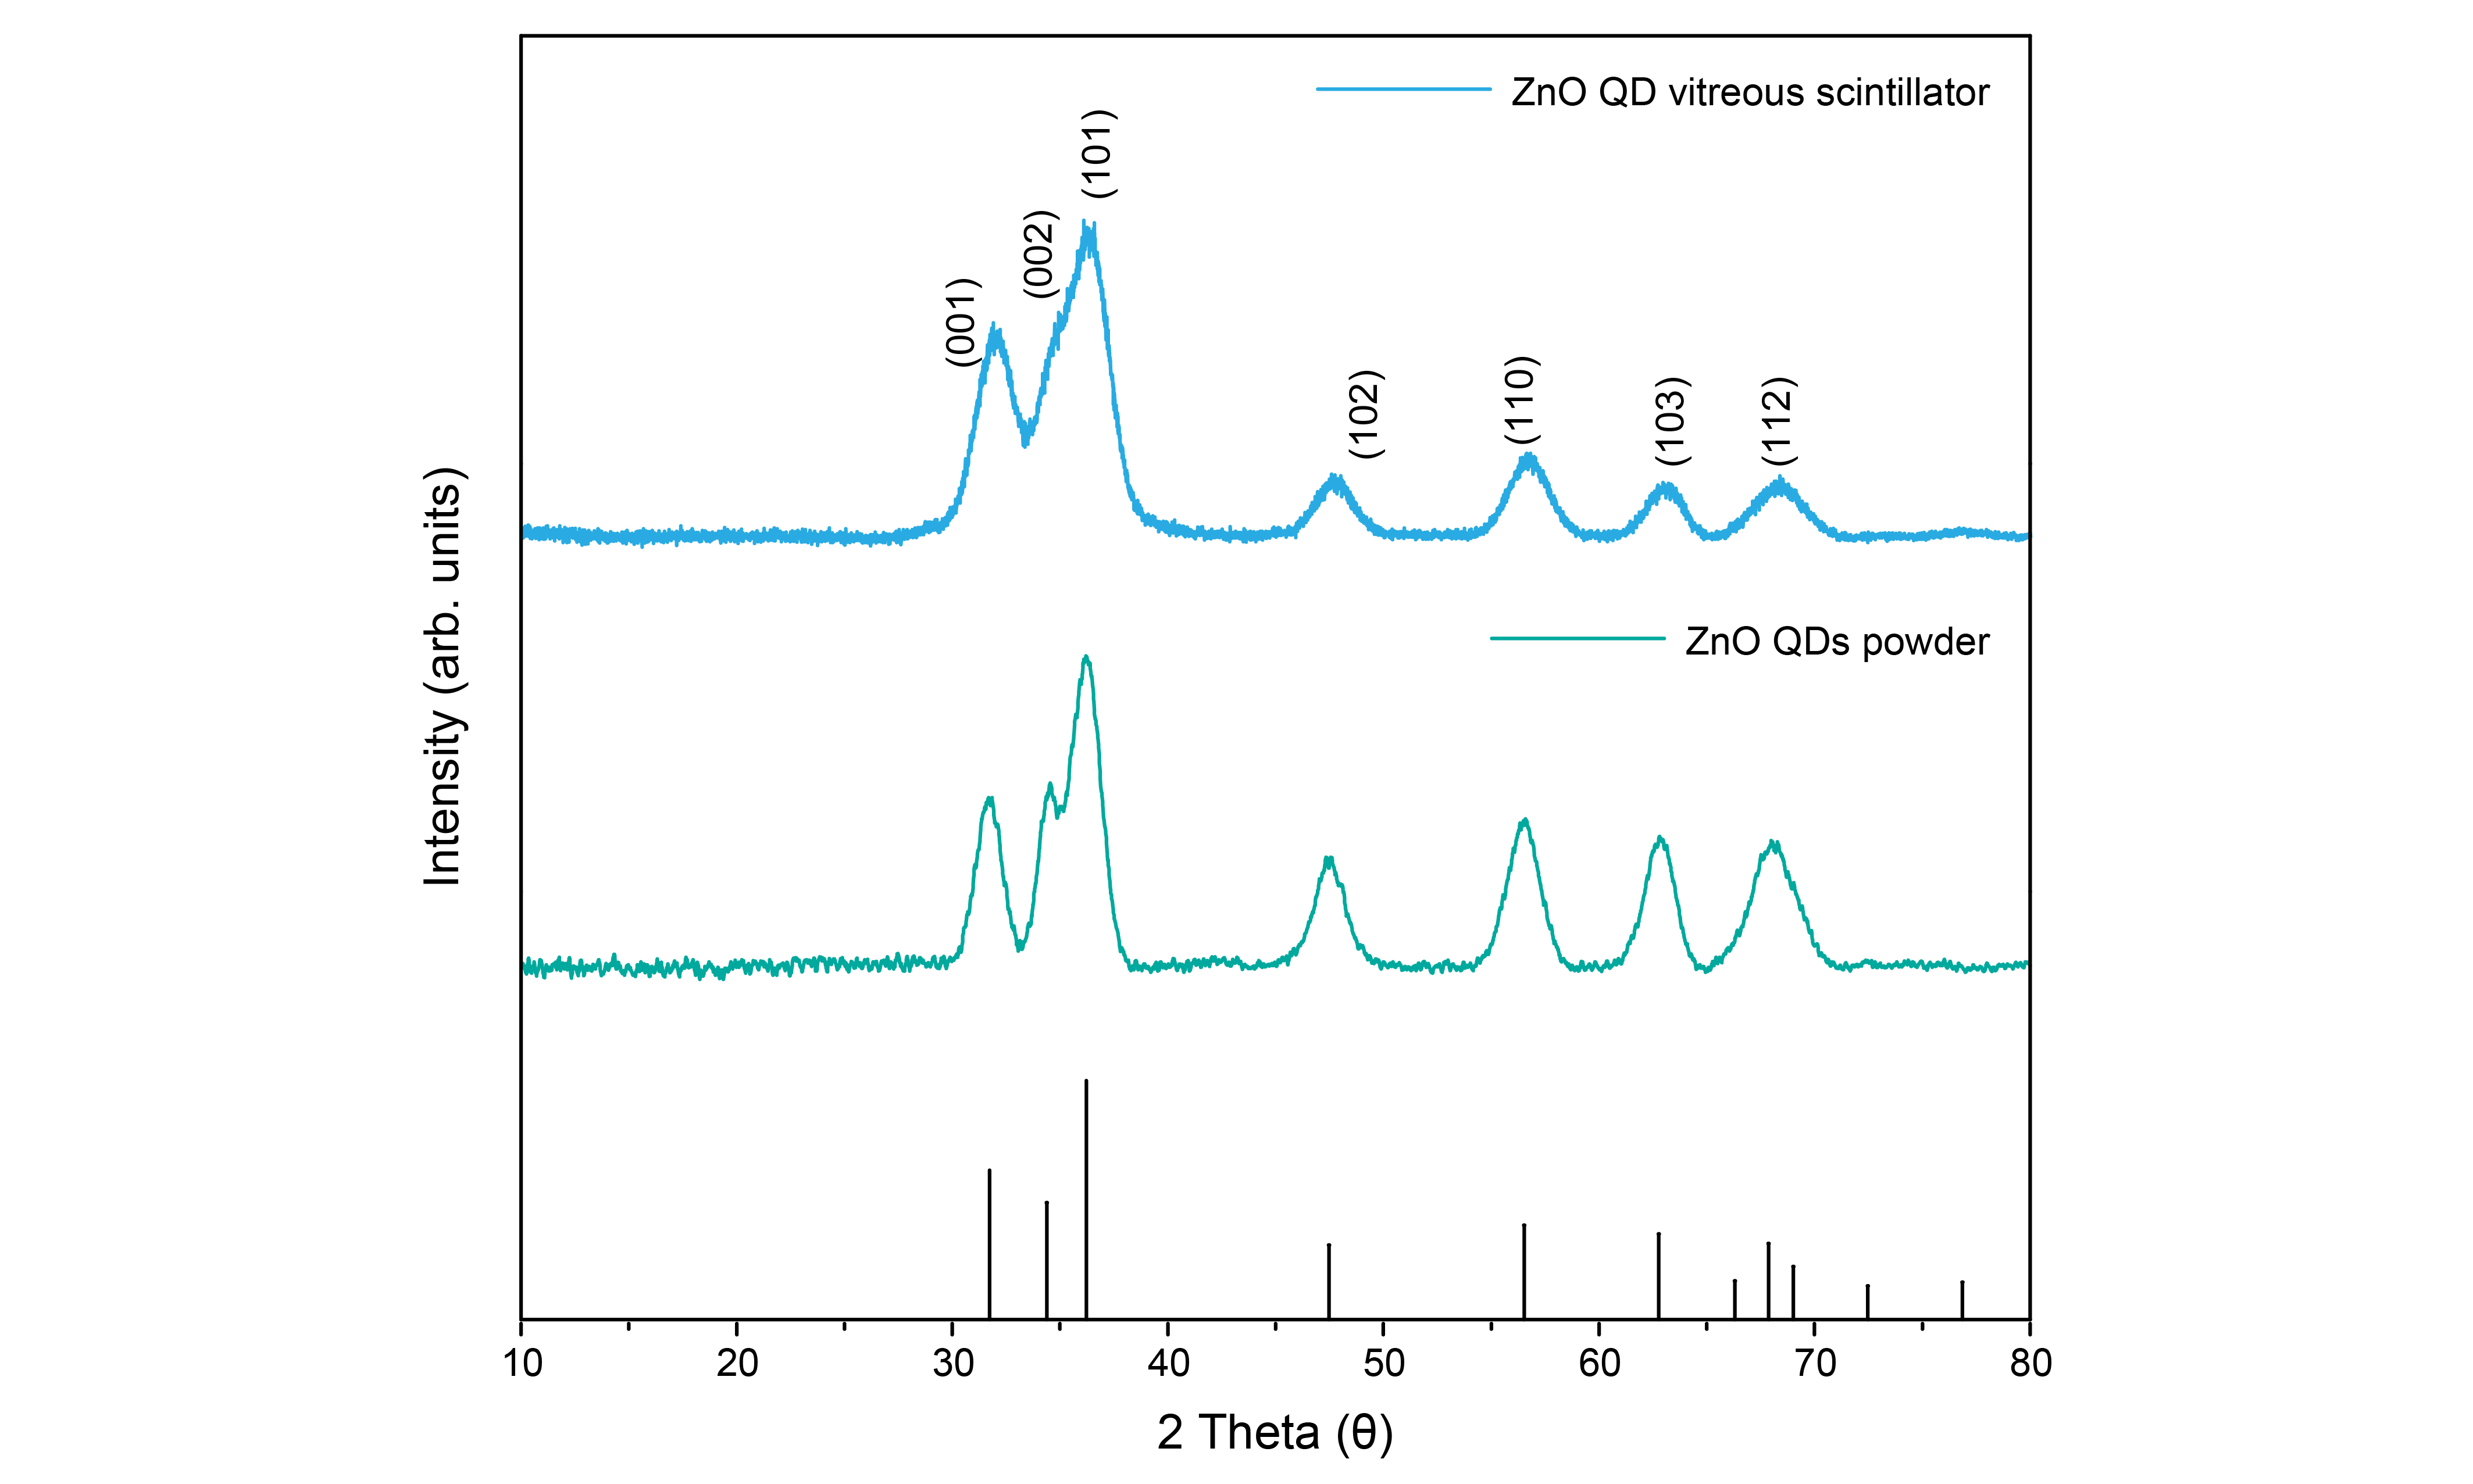


# Figure S8. XRD pattern of the ZnO QD powders and ZnO QD vitreous scintillator.


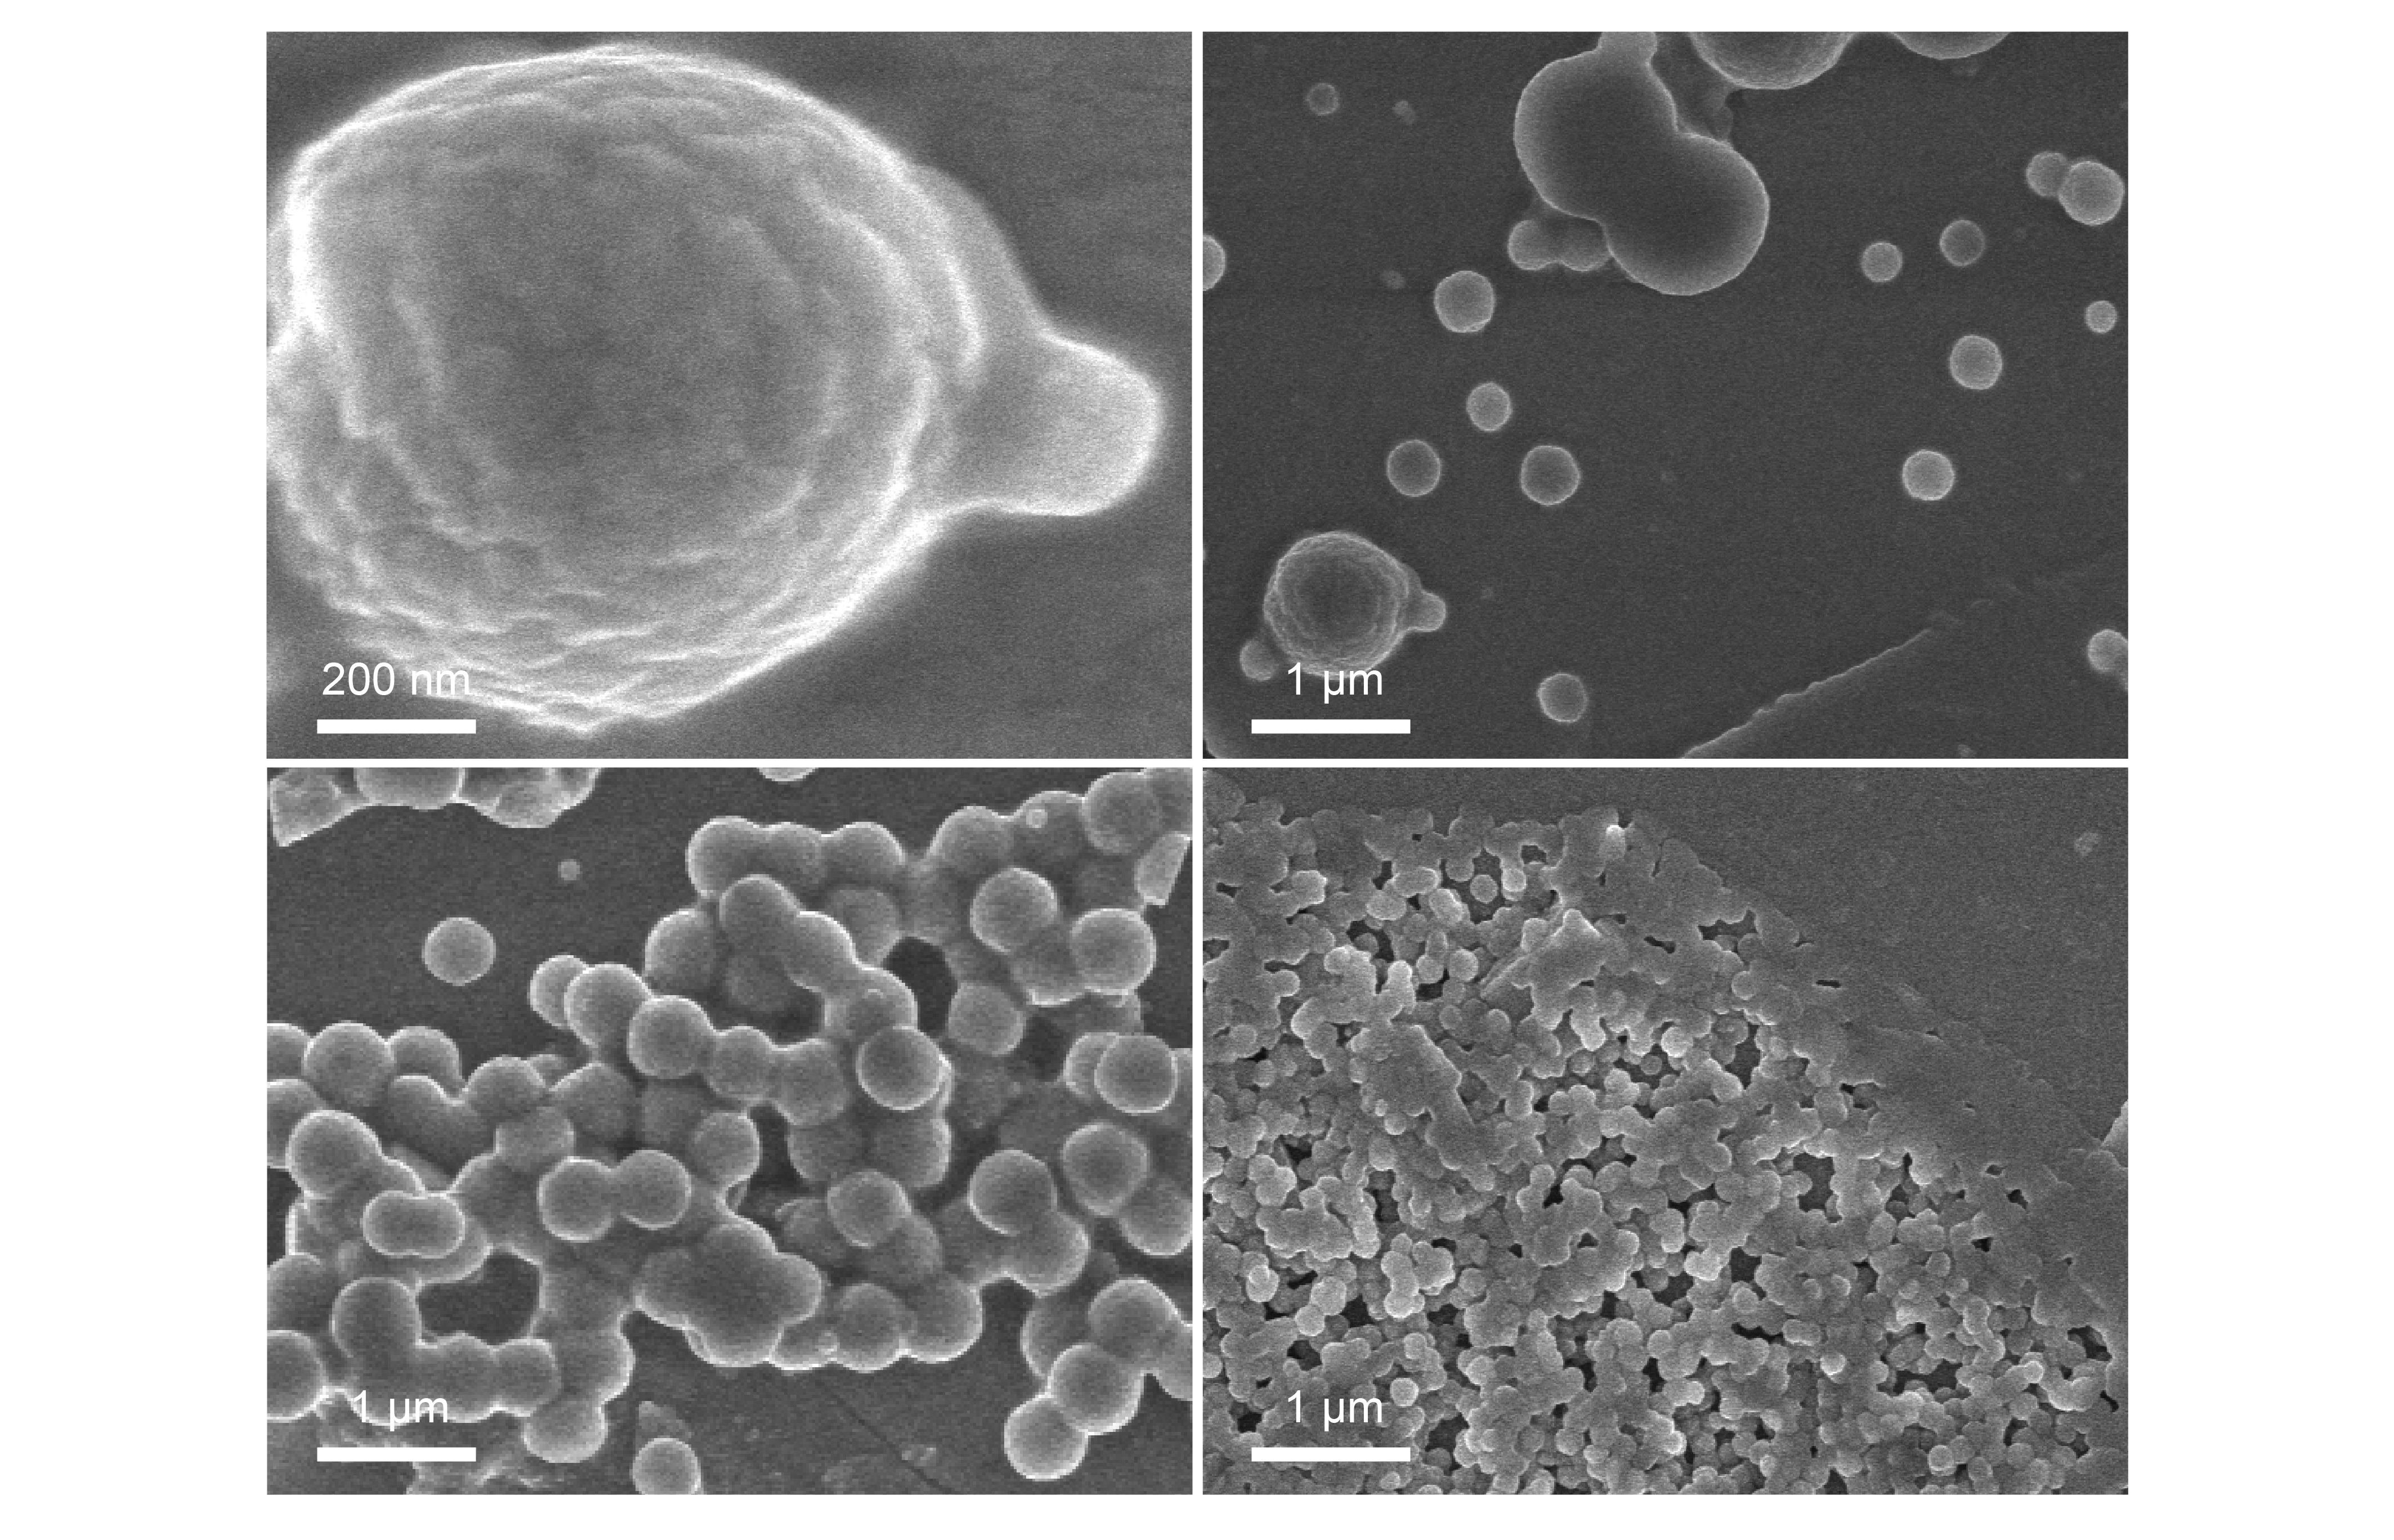


# Figure S9. SEM images of the ZnO QD vitreous scintillator captured at various formation processes.


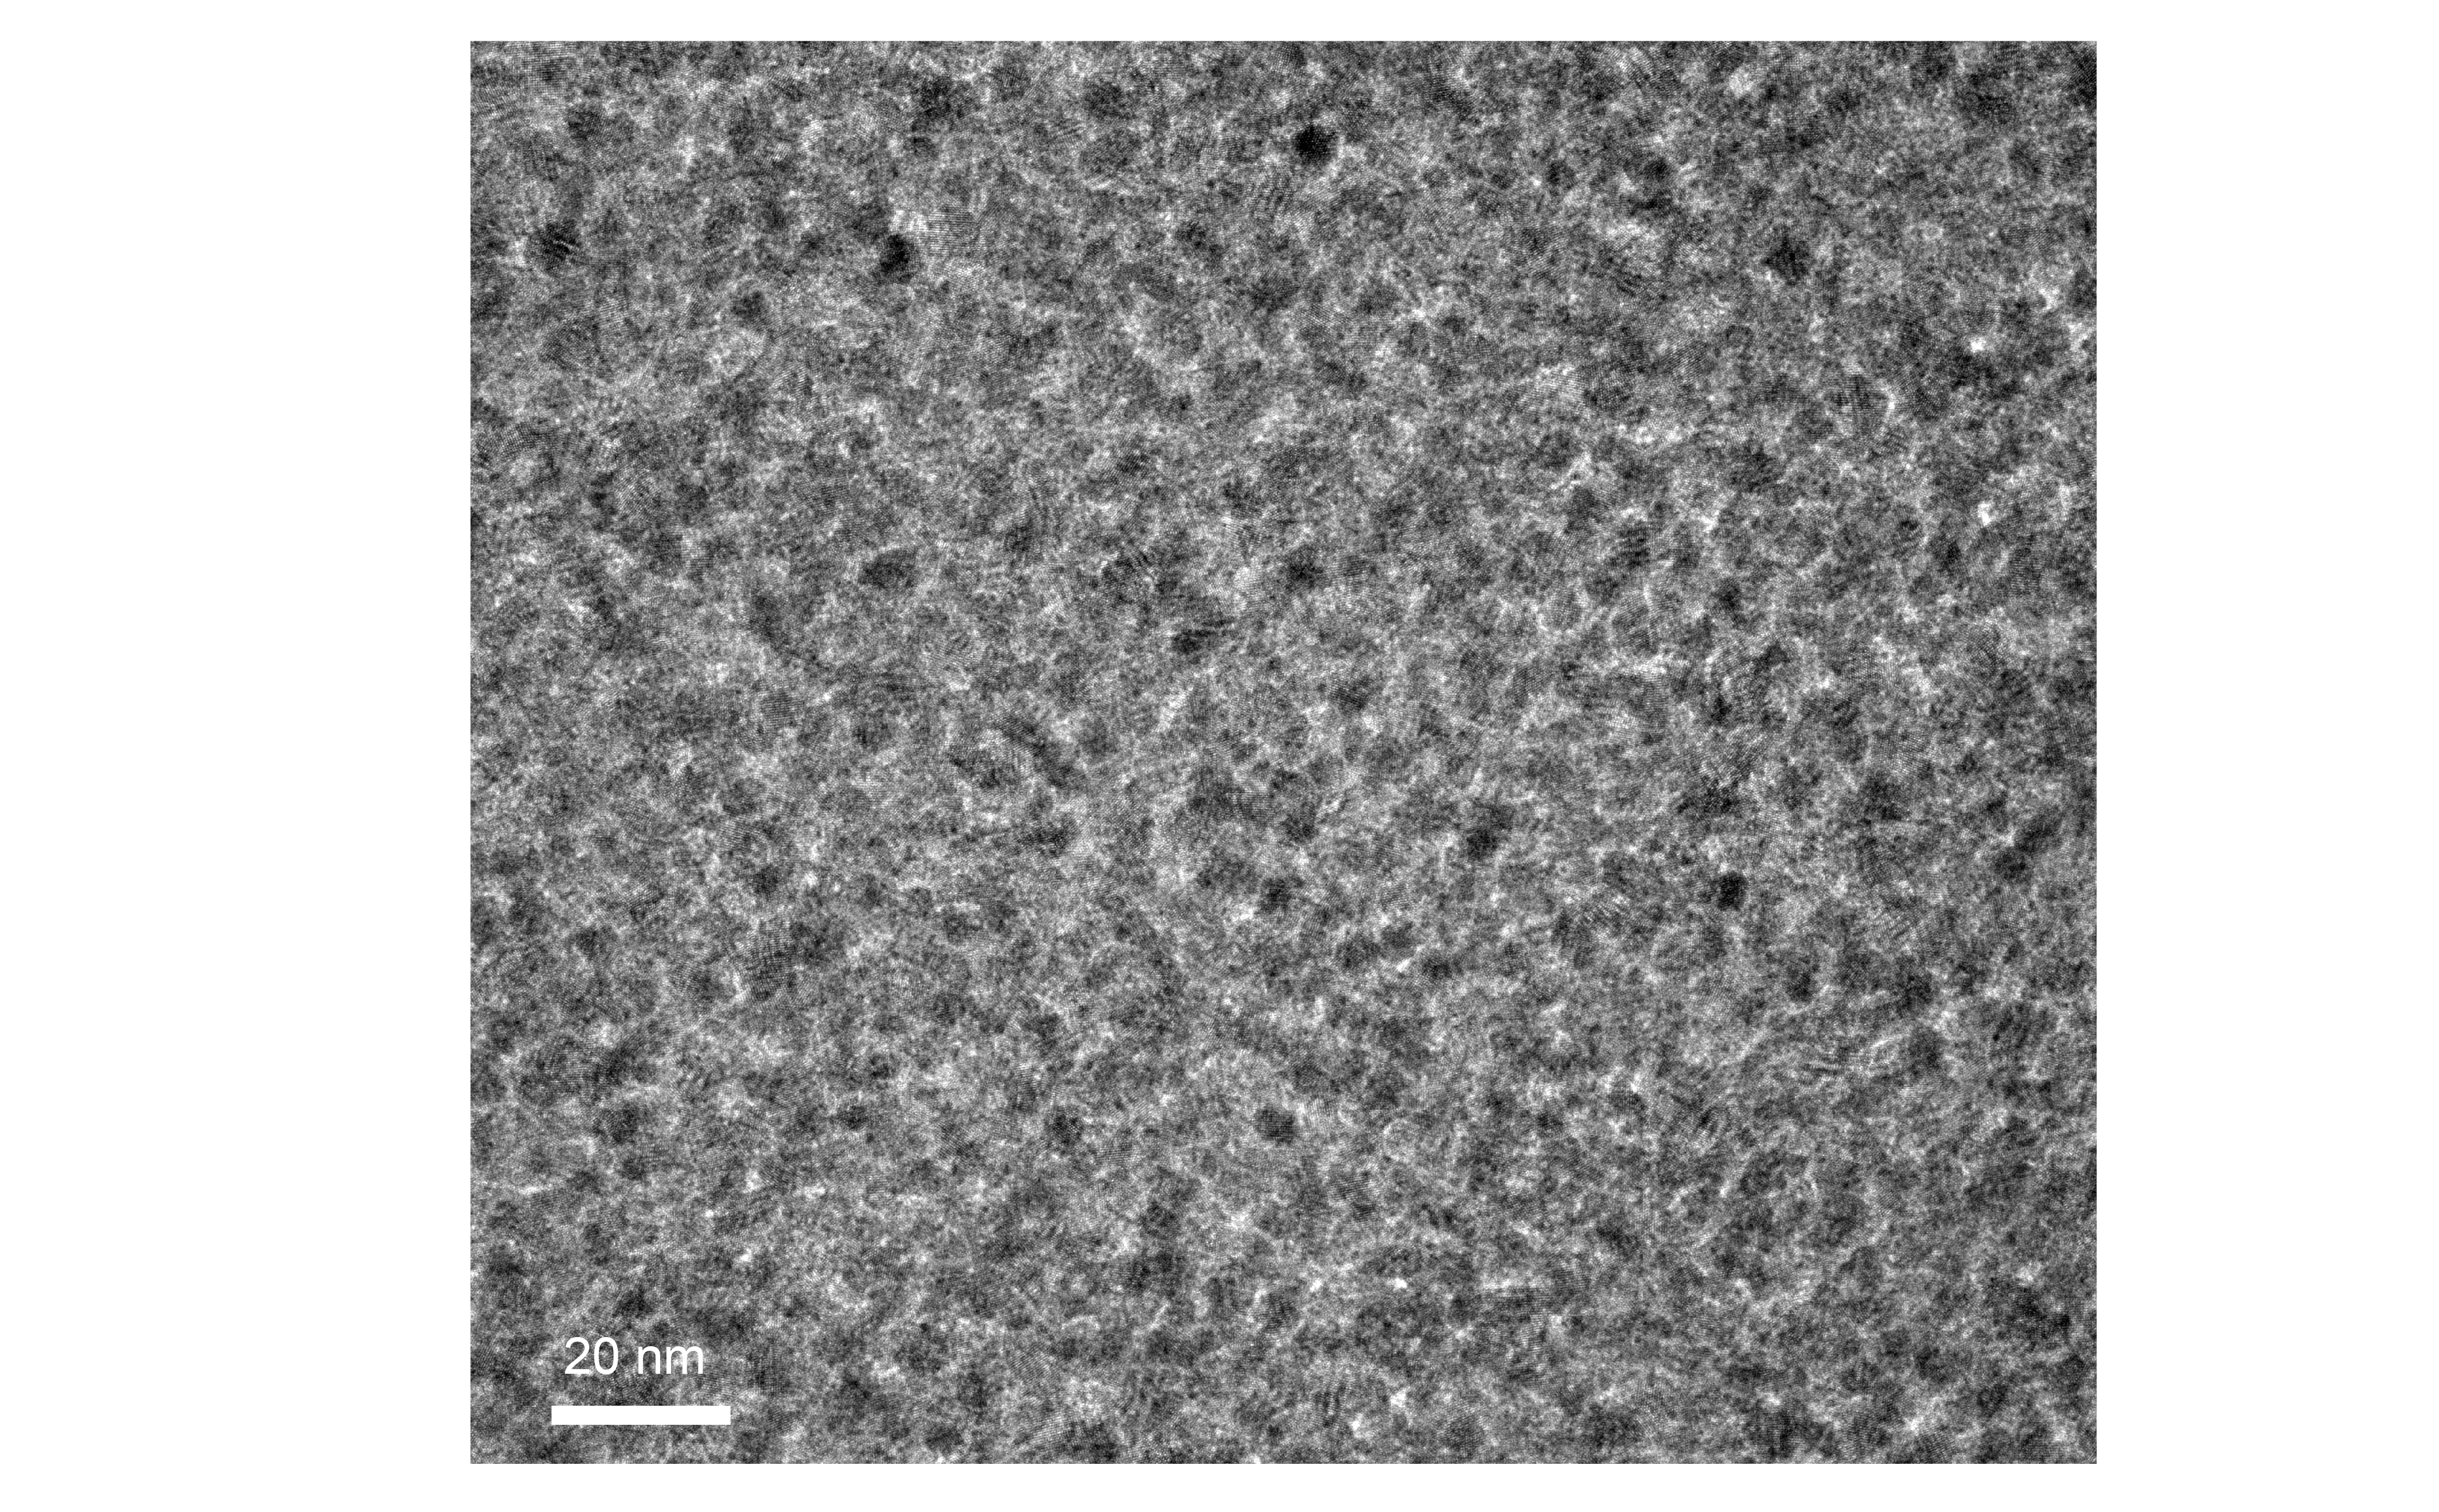


# Figure S10. TEM image of the ZnO QD vitreous scintillator.


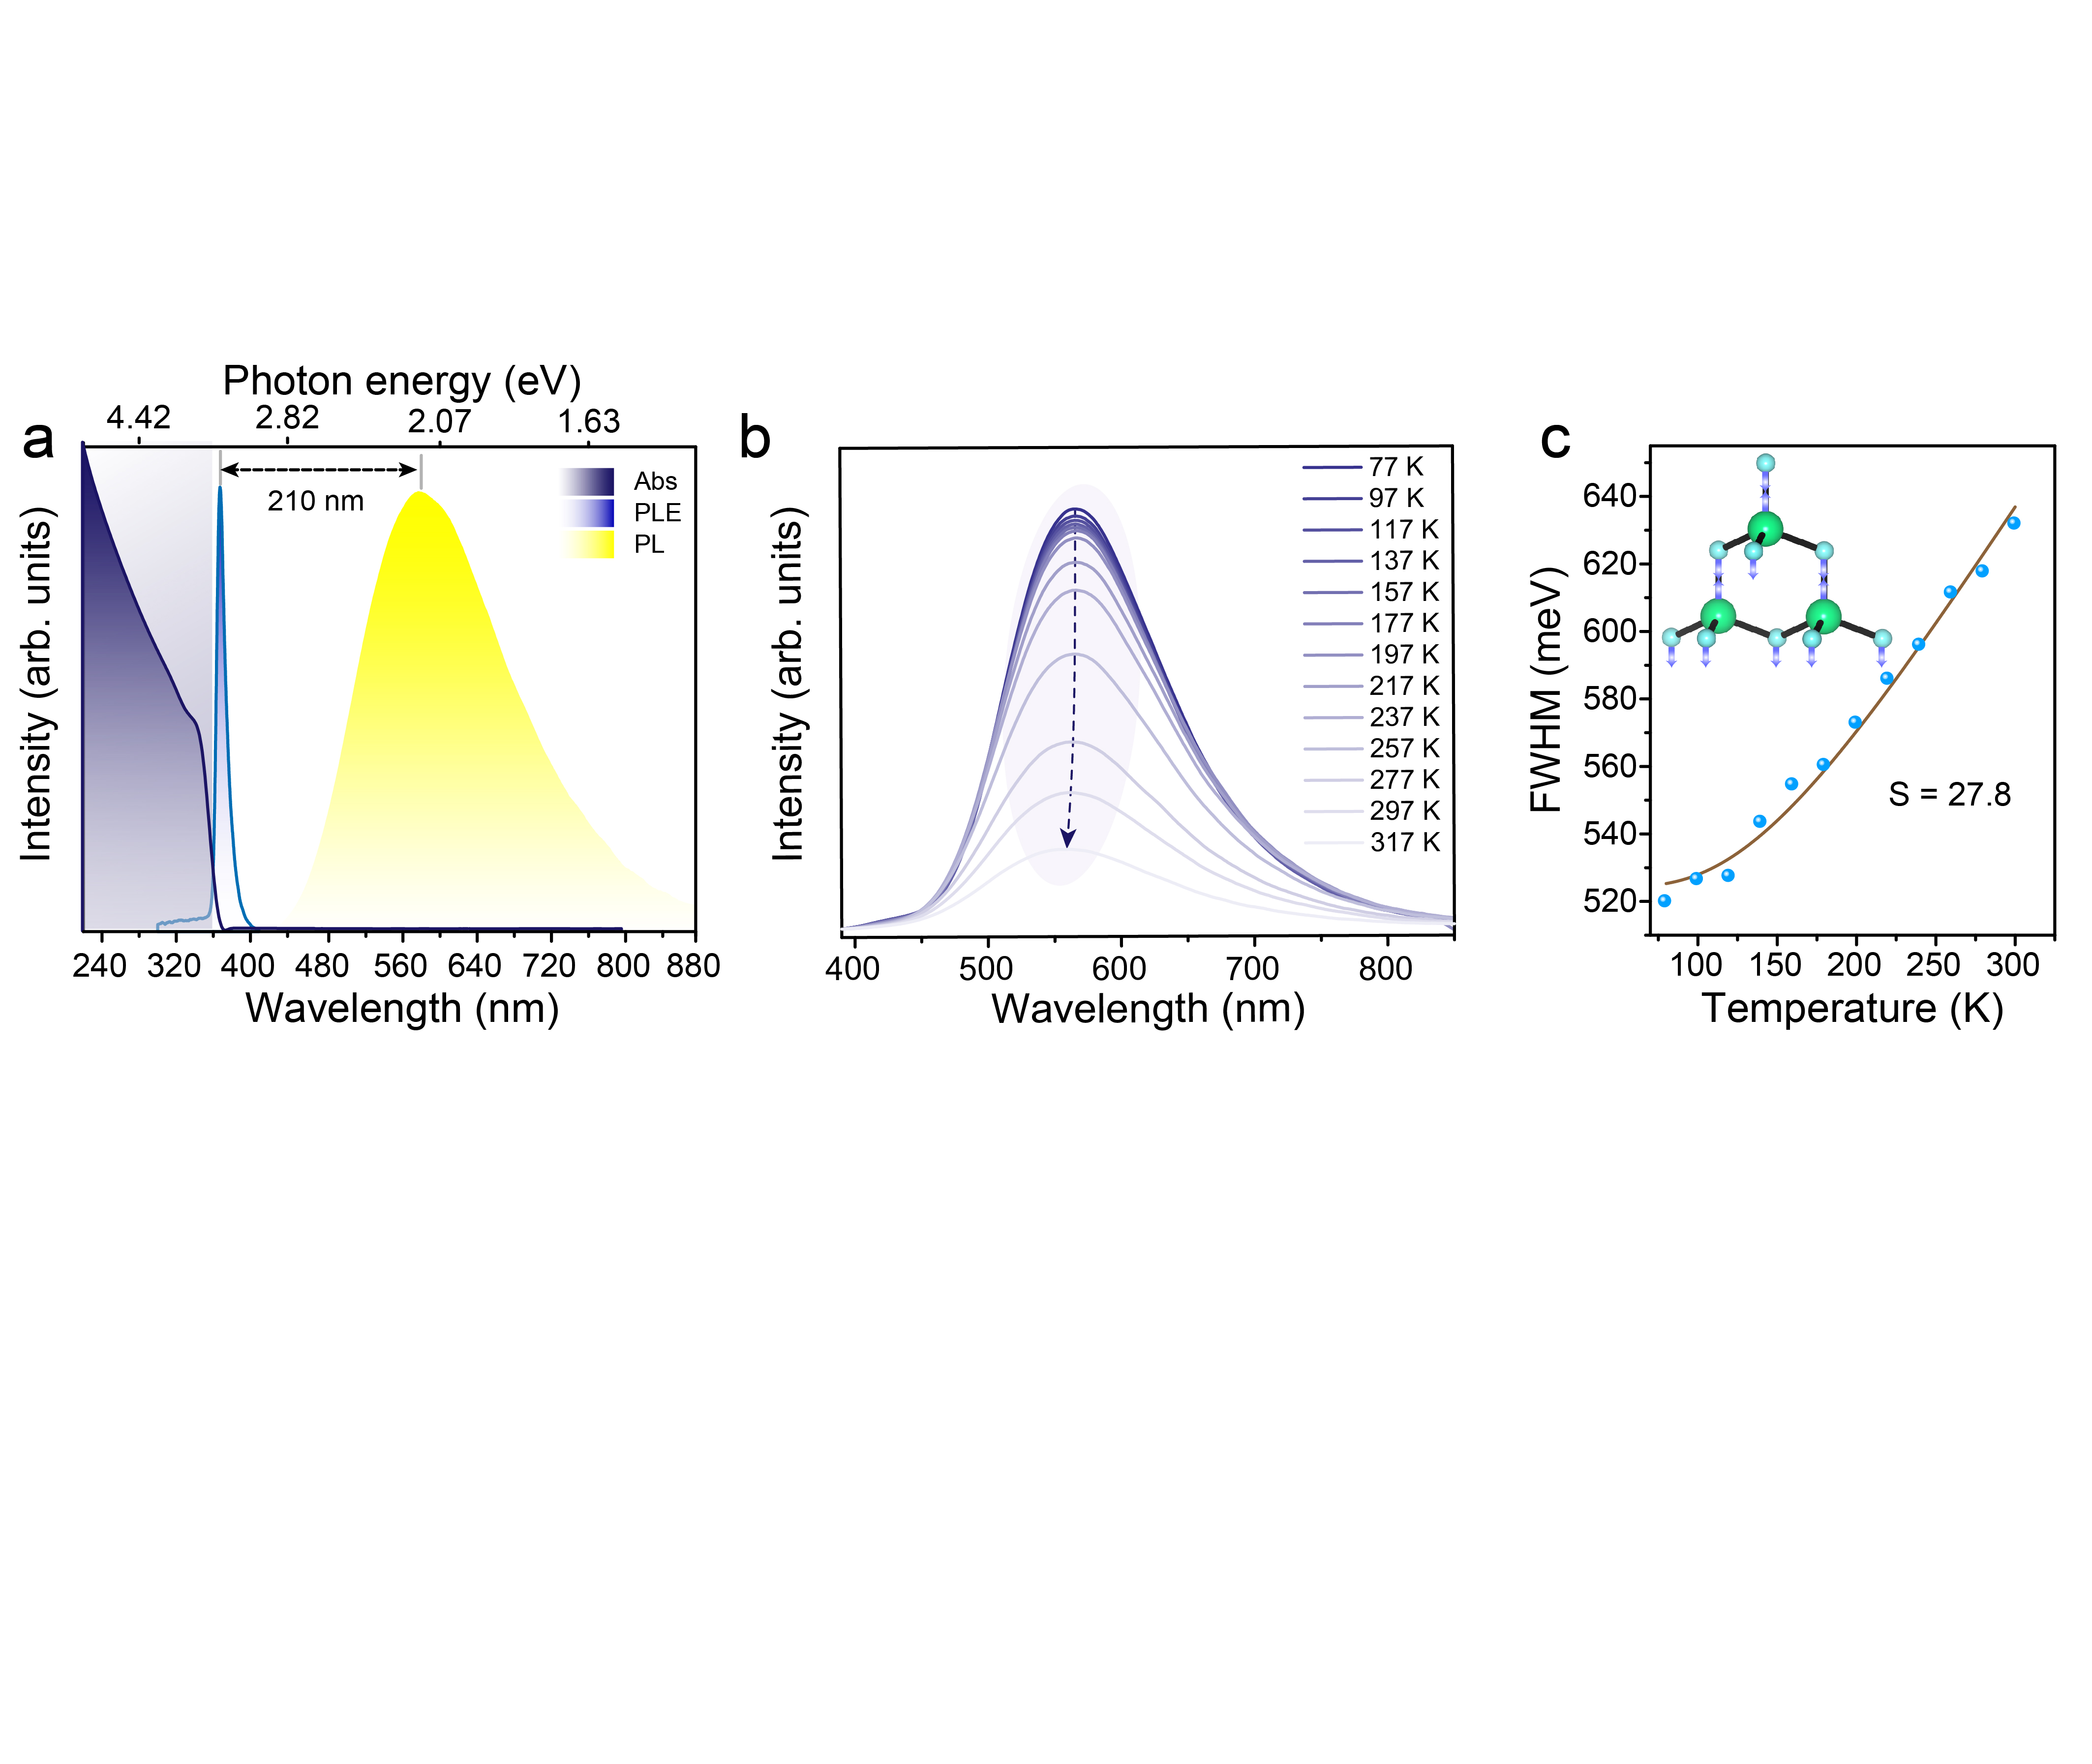


# Figure S11. (a), Absorbance, PL, and PL excitation spectra of ZnO QDs. (b) Temperature-dependent PL spectra of ZnO QDs measured from 77 to 317 K. (c) Temperature-dependent FWHM emission spectrum, and the corresponding fitting curve result (insert: schematic diagram of optical phonon vibration in ZnO QDs).


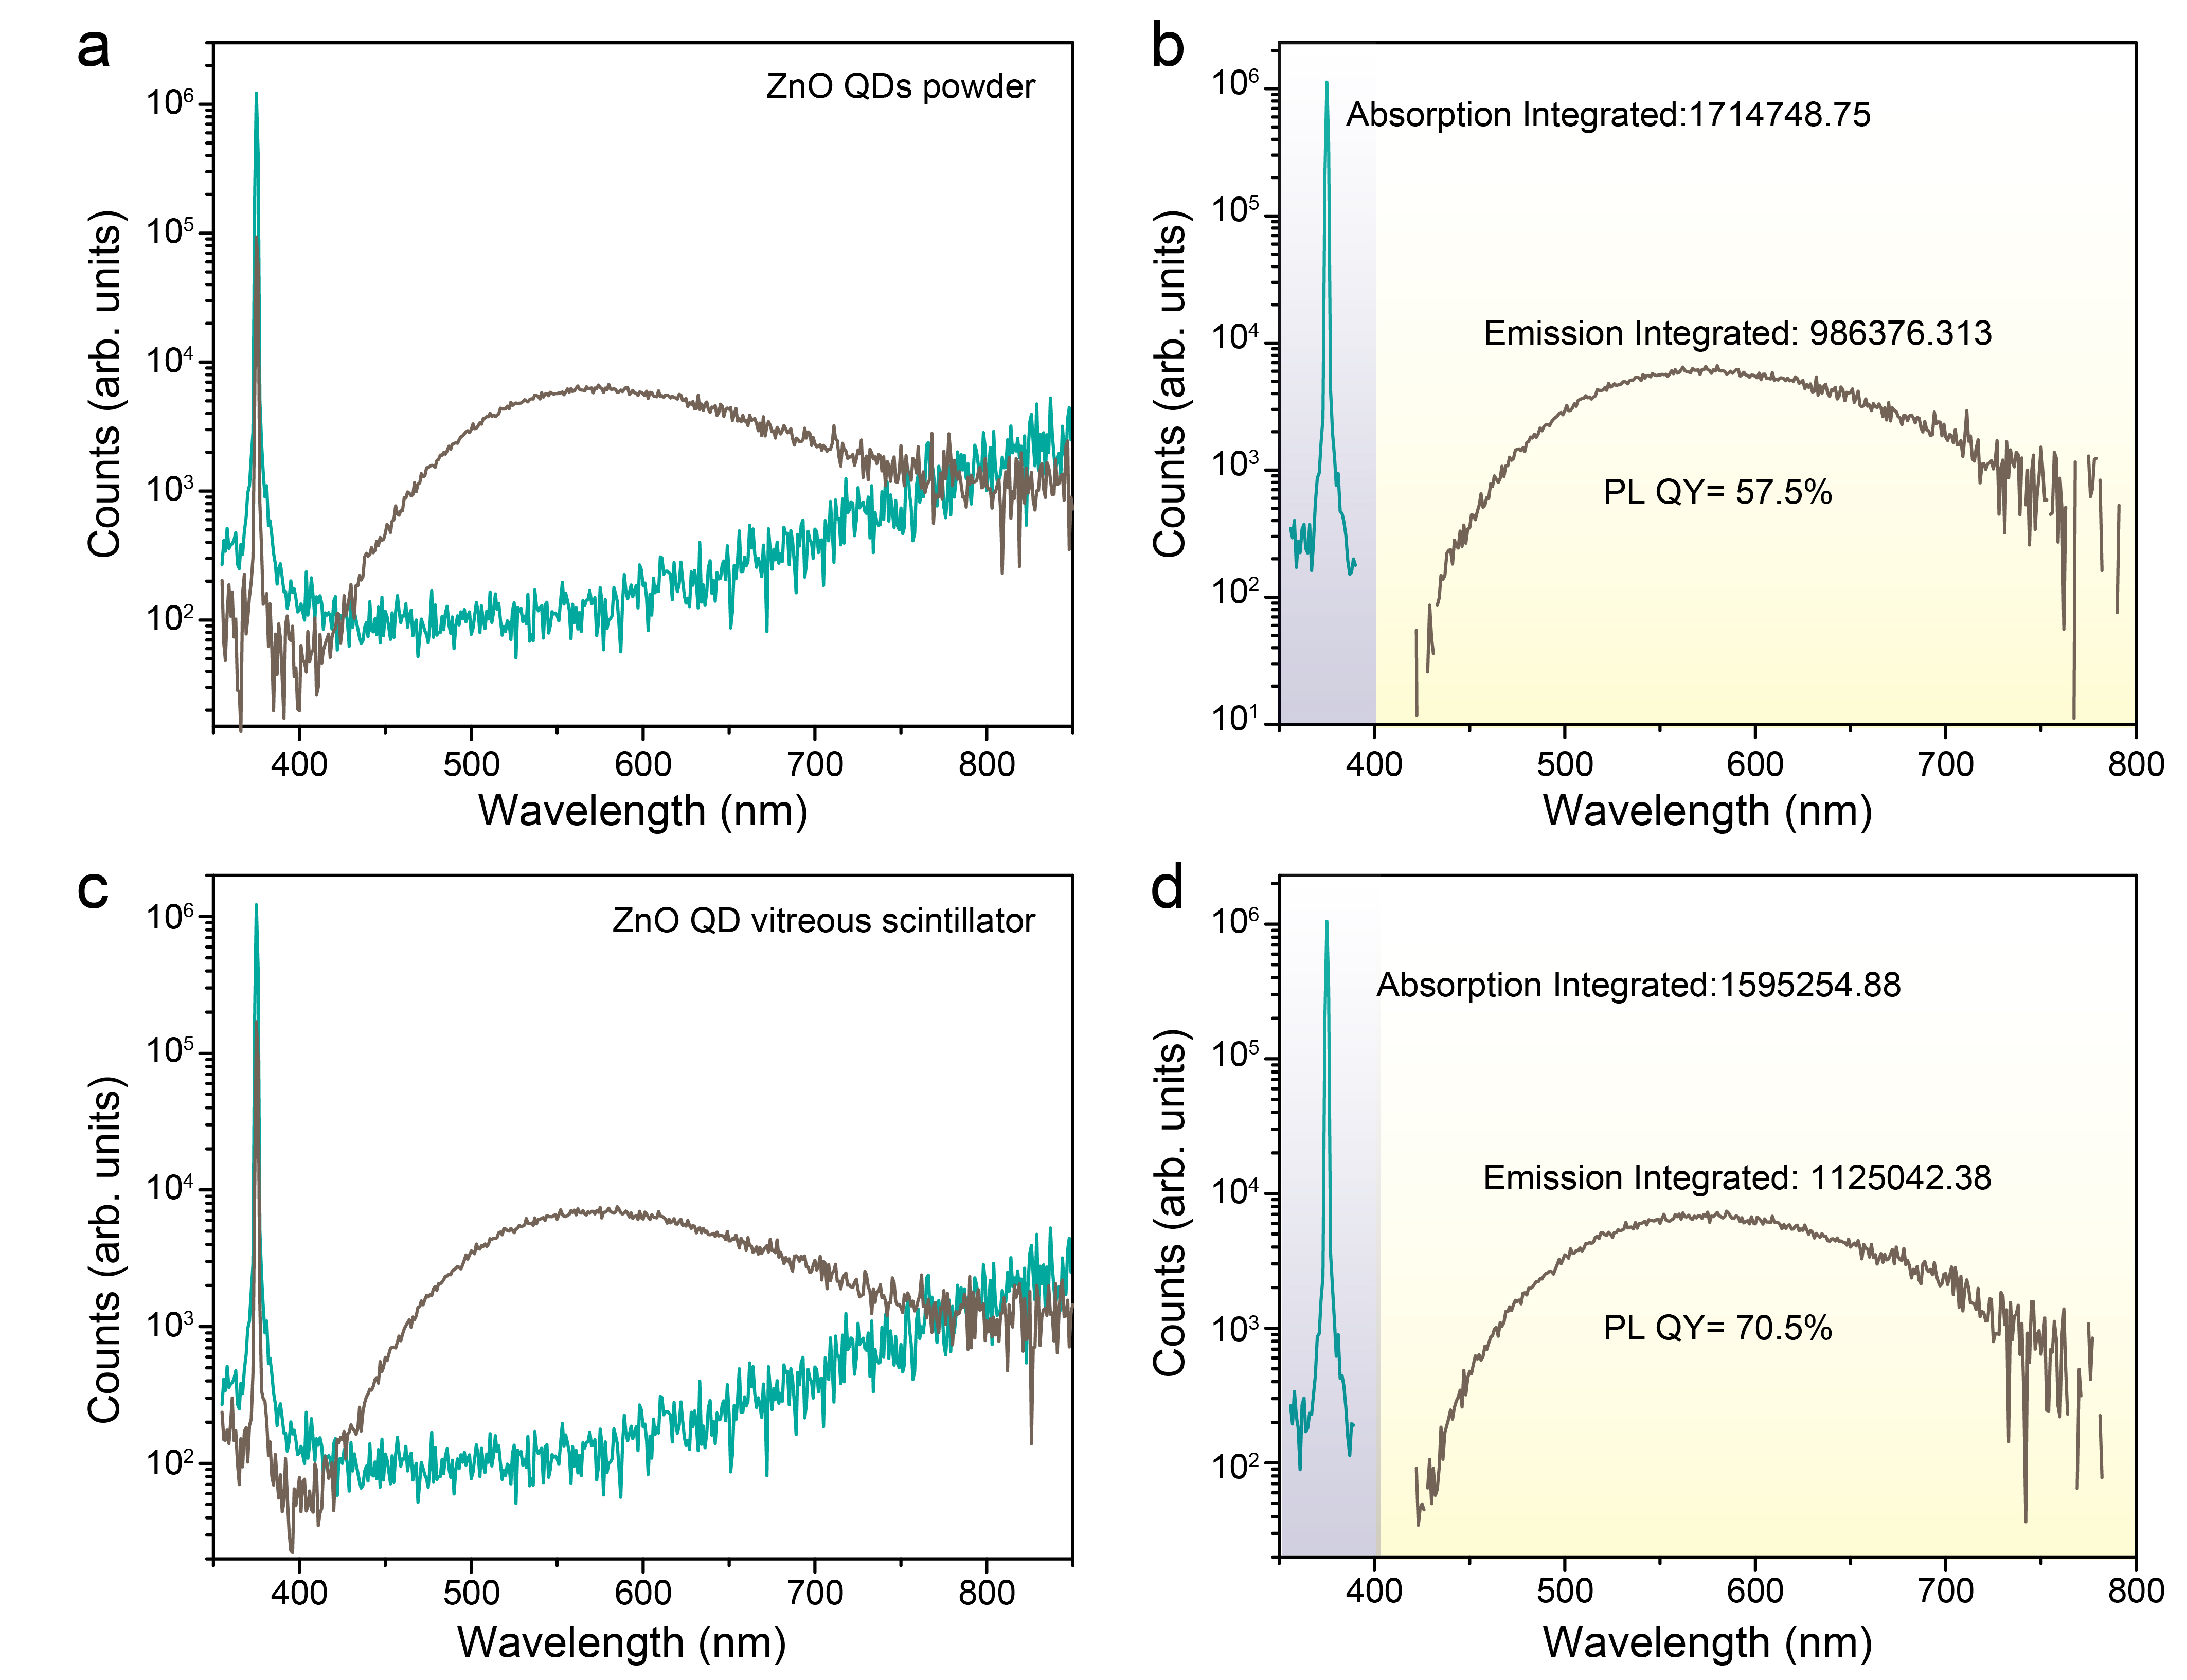


# Figure S12. (a-b) PL QY measurement spectra for the ZnO QD powders, (c-d) PL QY spectra for the ZnO QD vitreous scintillator.


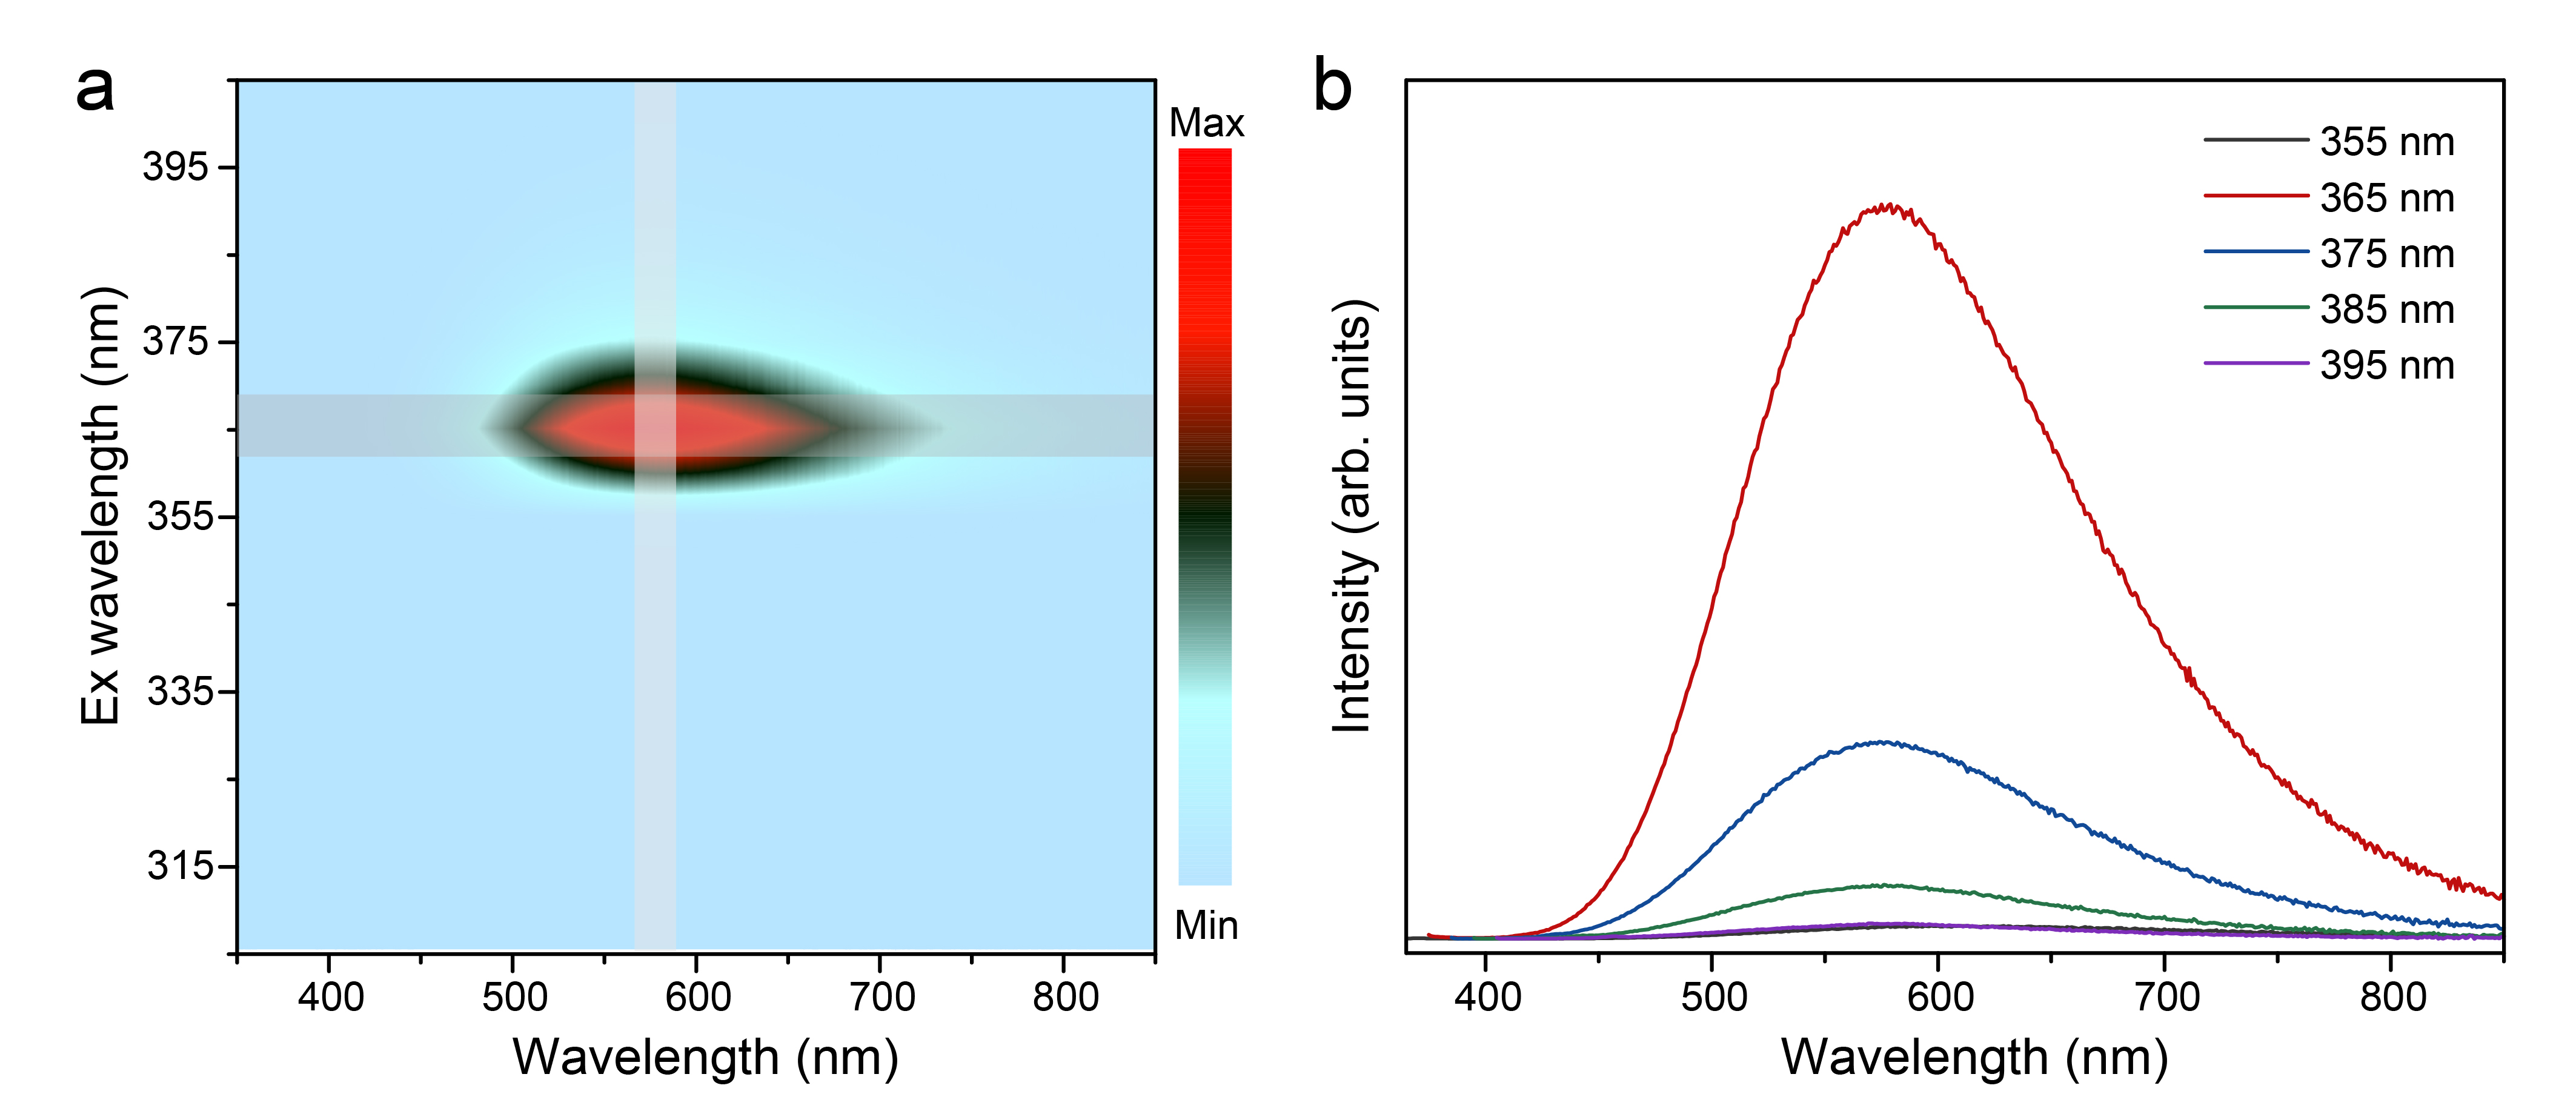


# Figure S13. (a) Excitation-Emission mapping of the ZnO QD vitreous scintillator. (b) The PL spectra of the ZnO QD vitreous scintillator under different excitation wavelengths.


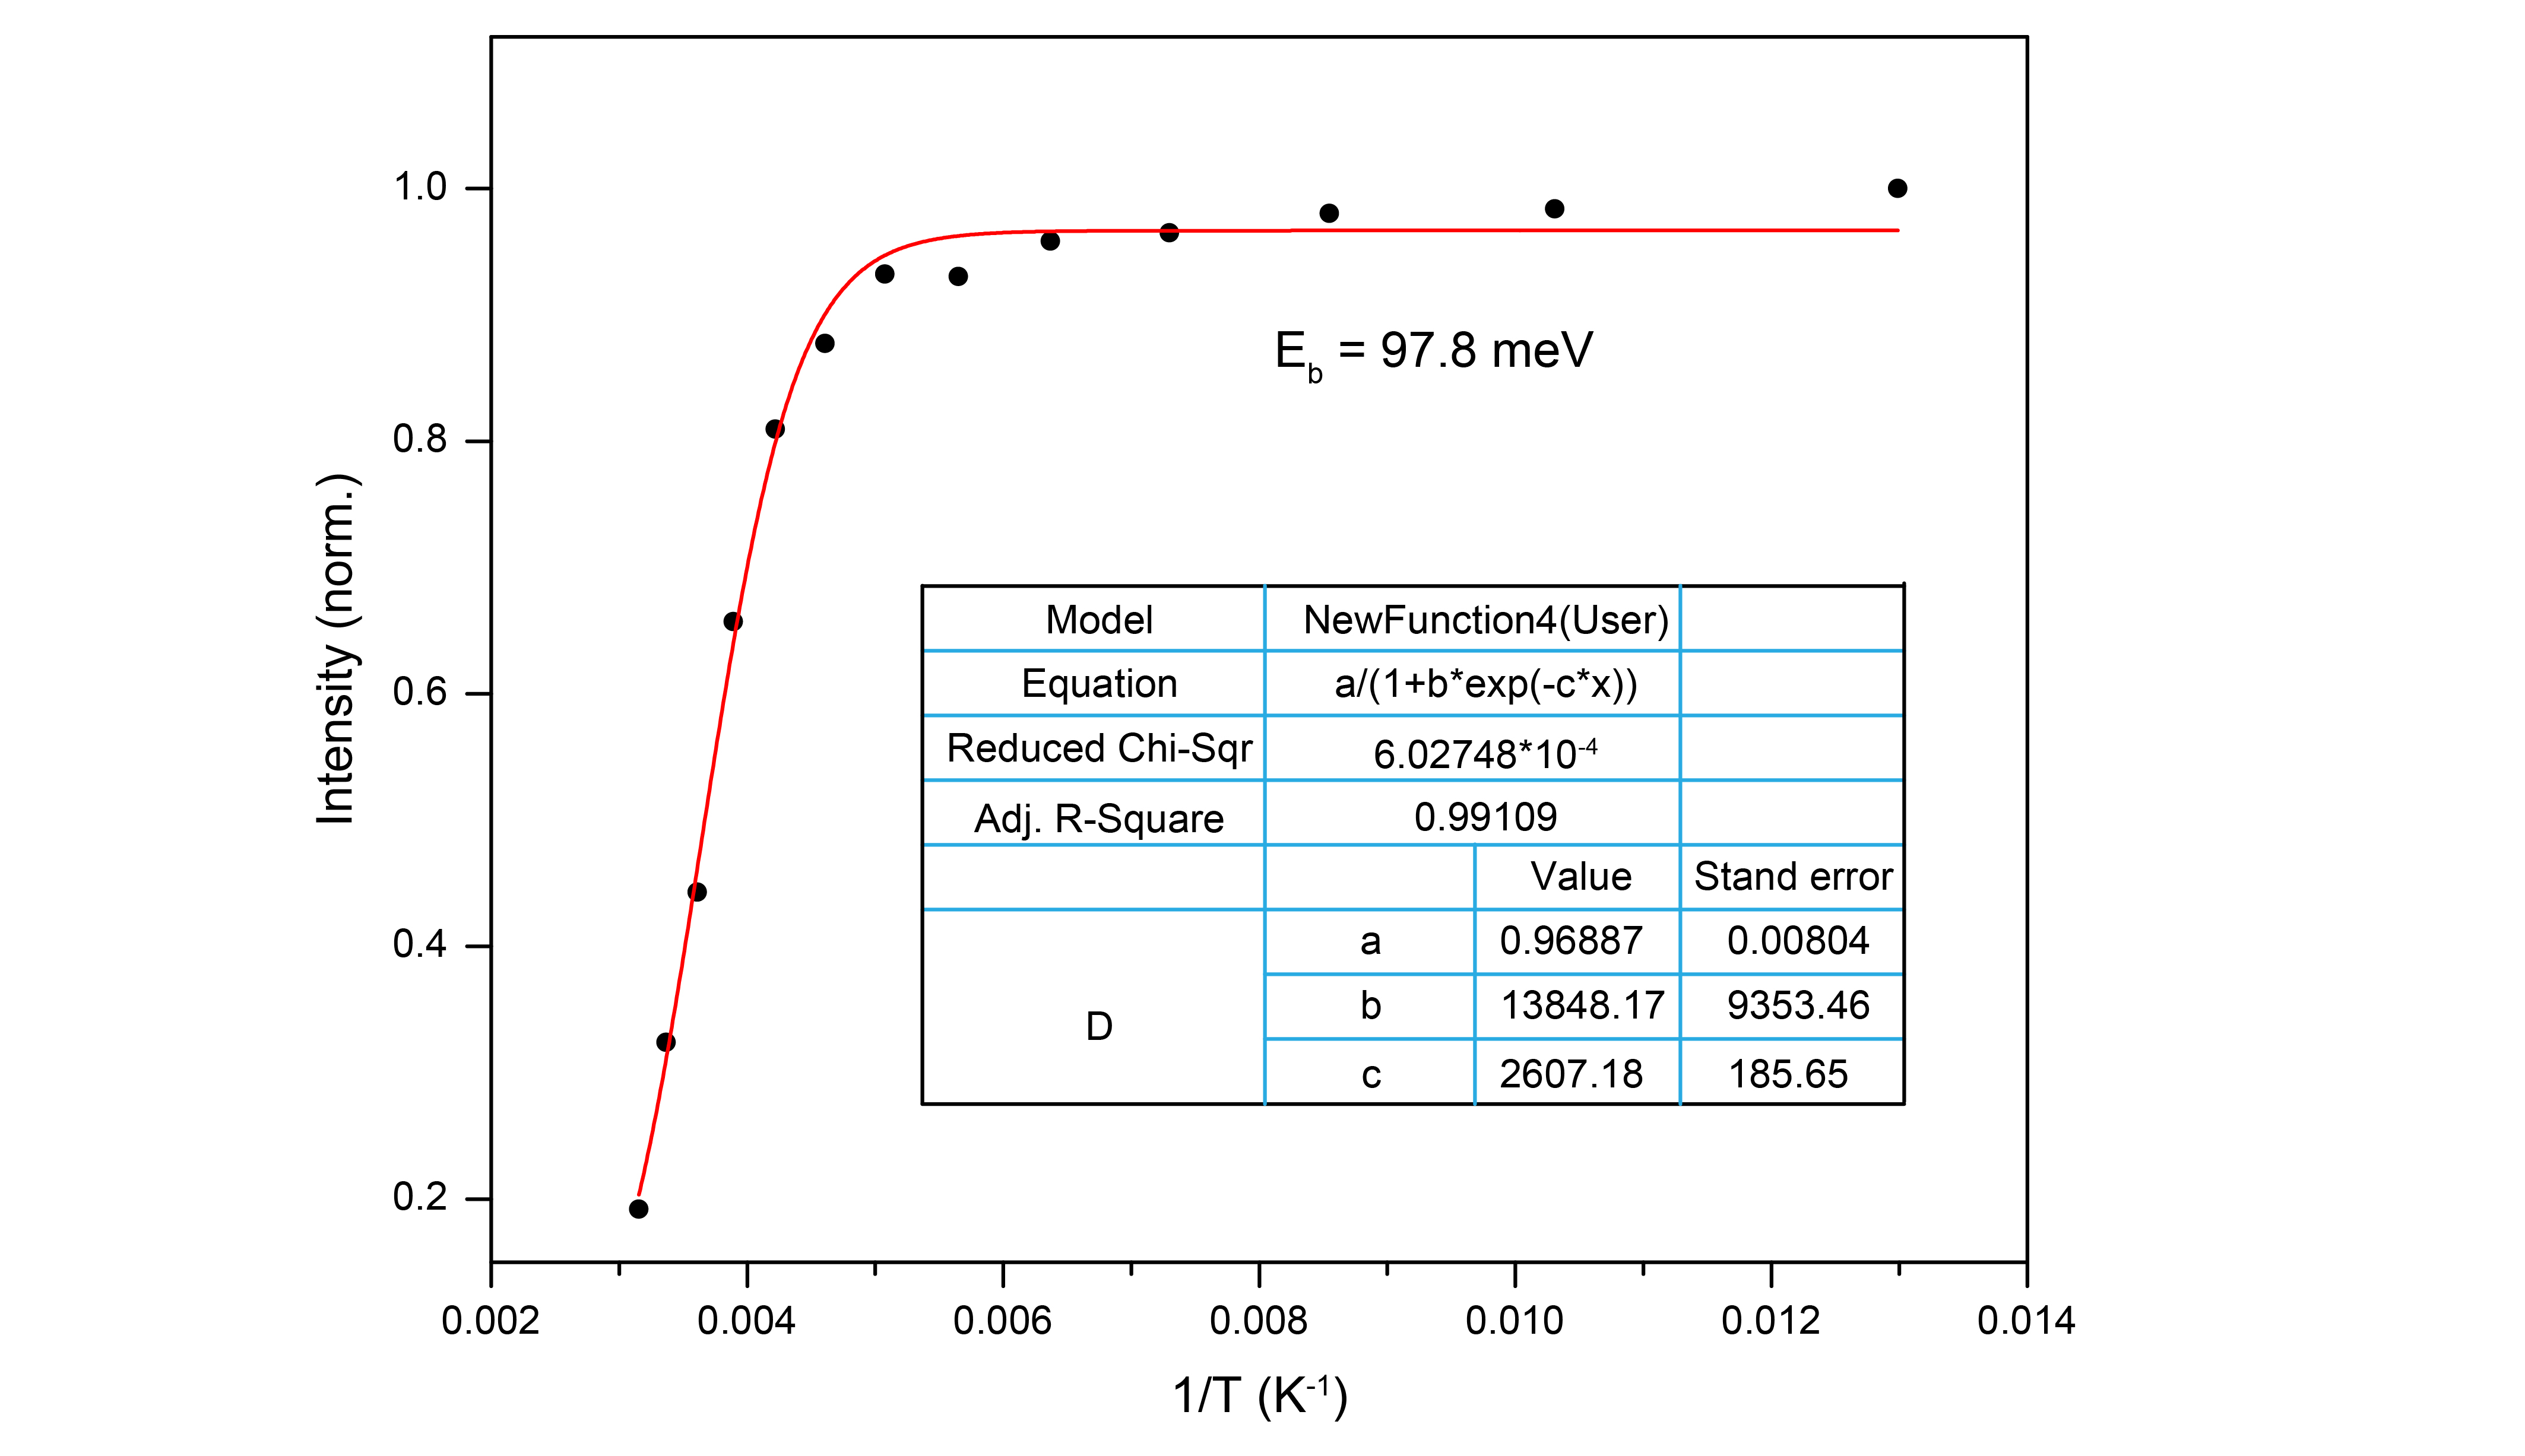


# Figure S14. Temperature-dependent integrated STE emission intensity of the ZnO QDs from 77 K-297 K.


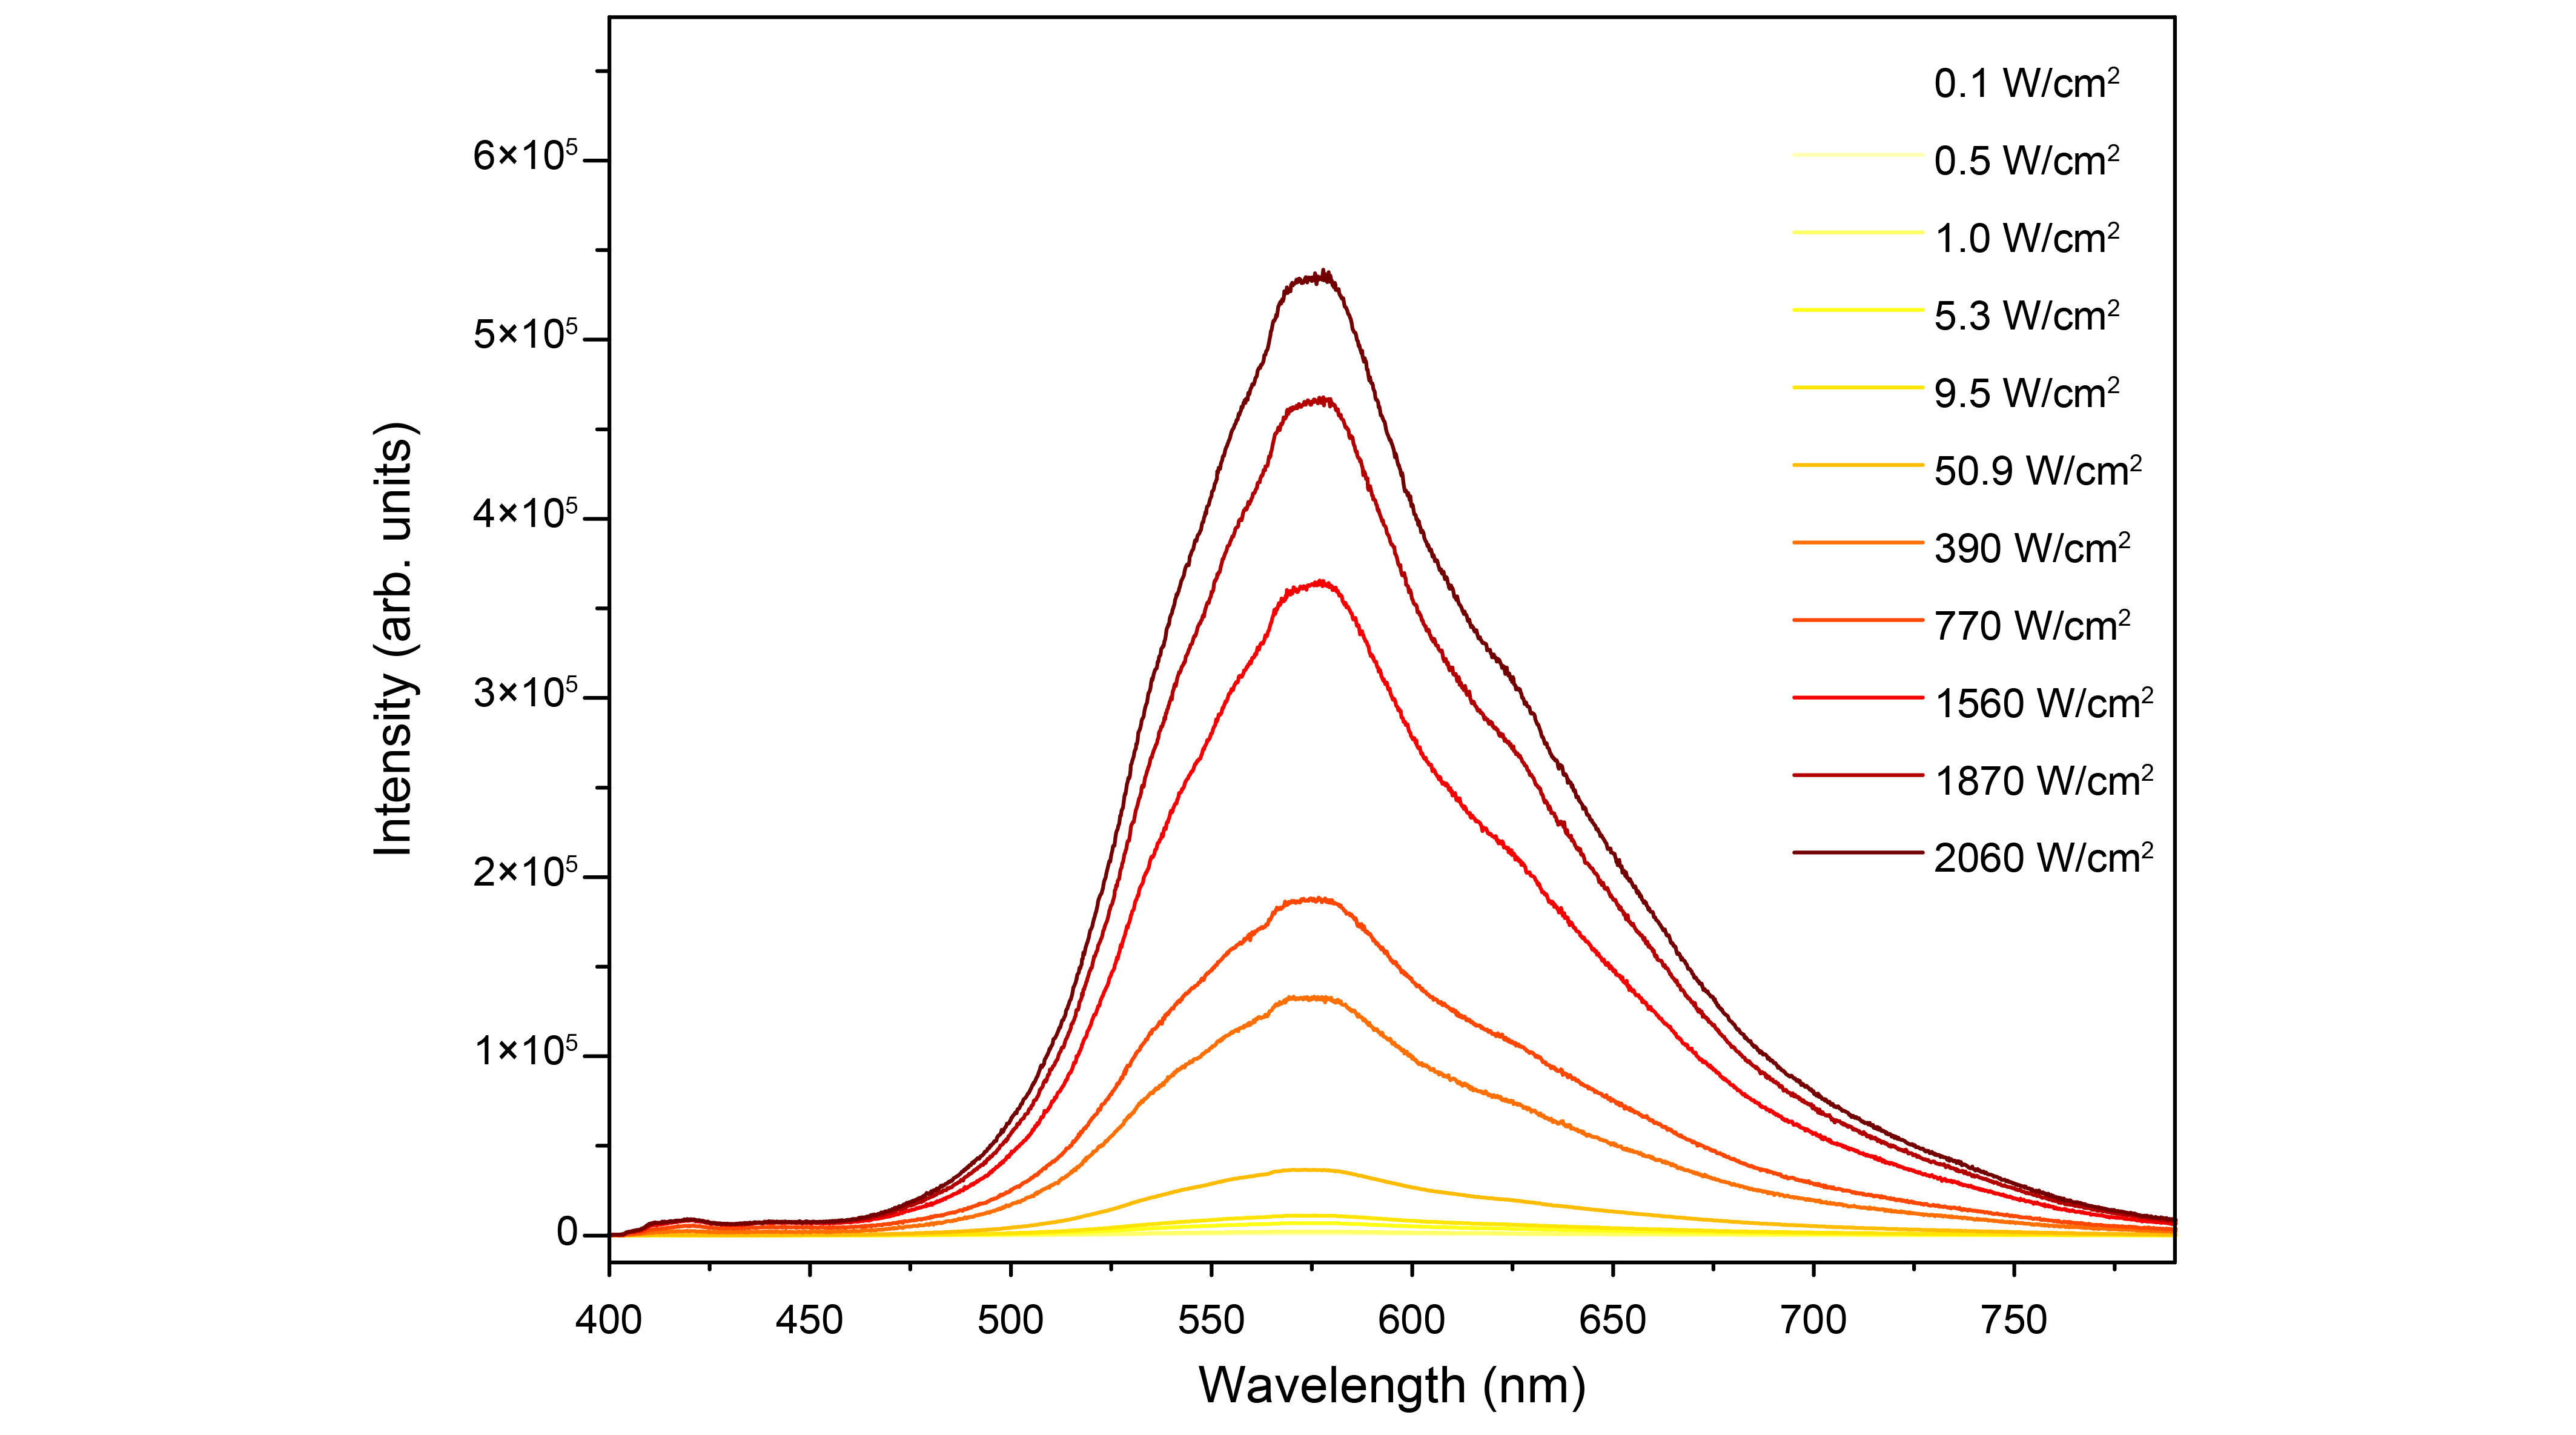


# Figure S15. The PL spectra of the ZnO QDs under excitation of laser with varying powers.


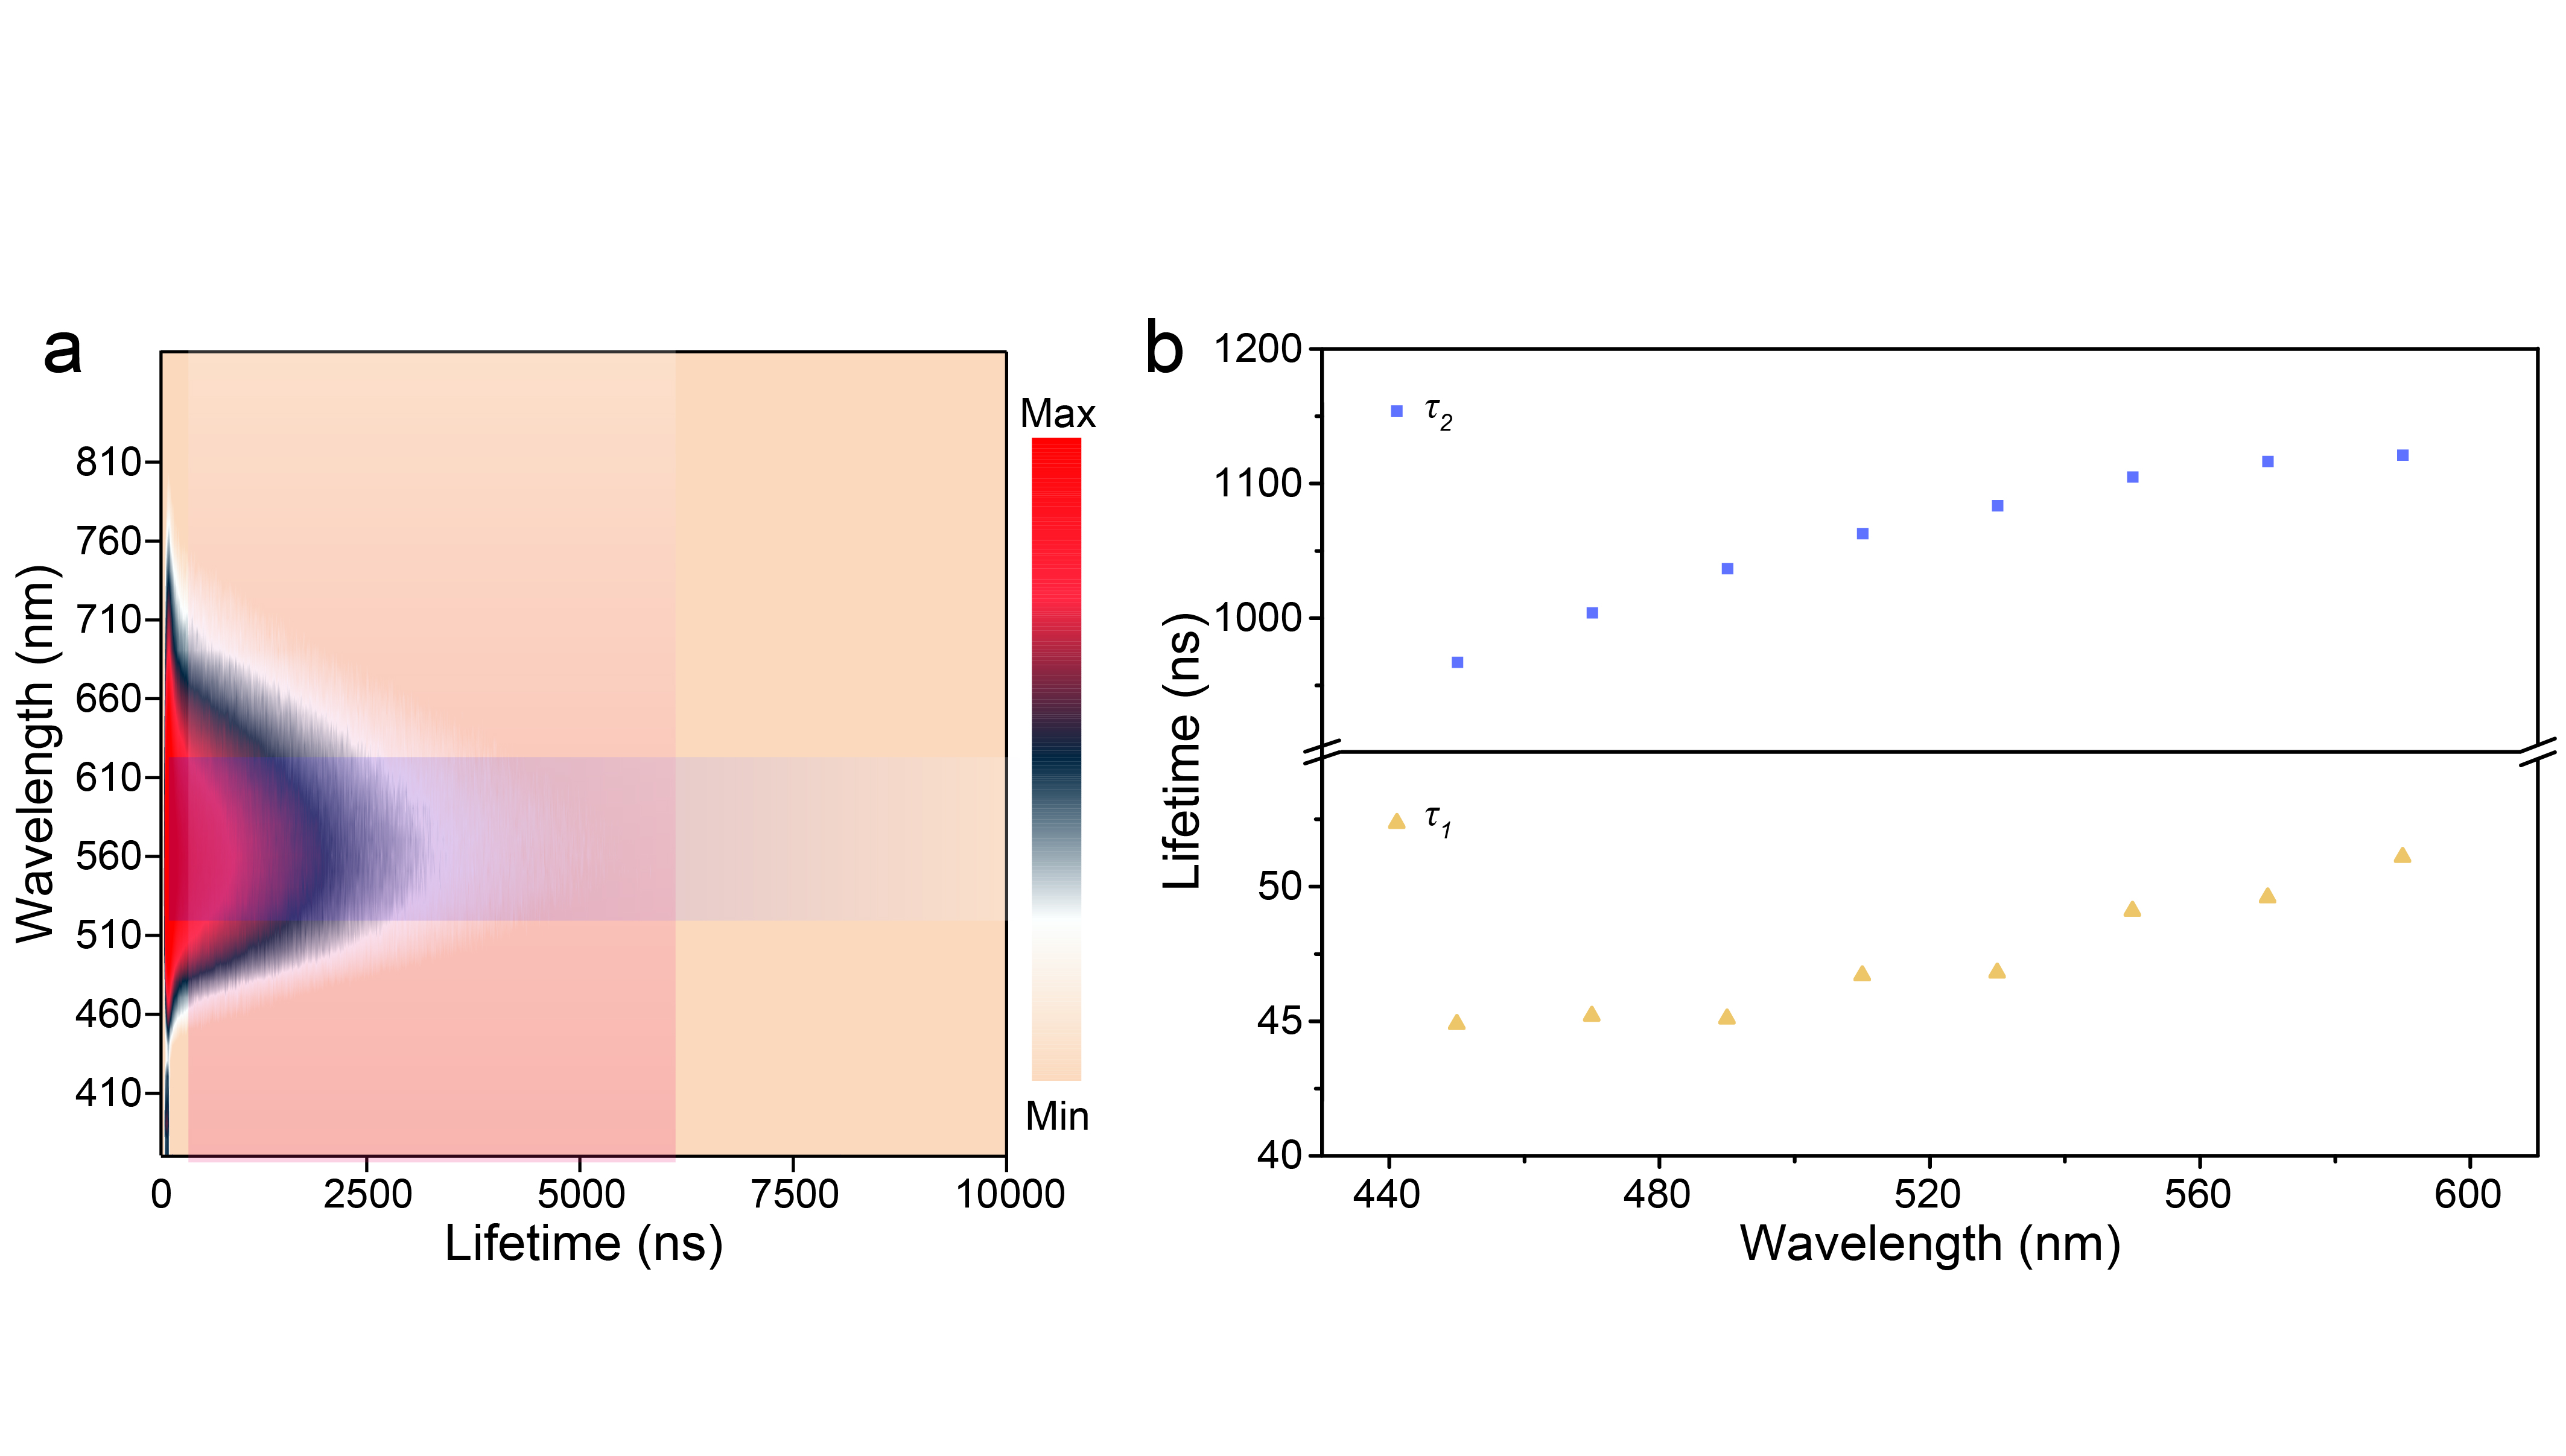


# Figure S16. (a) Contour plots of time-resolved emission spectra of the ZnO QDs. (b) The PL lifetime changes of the ZnO QDs at selected wavelength (450 nm-590 nm) under 340 nm excitation.


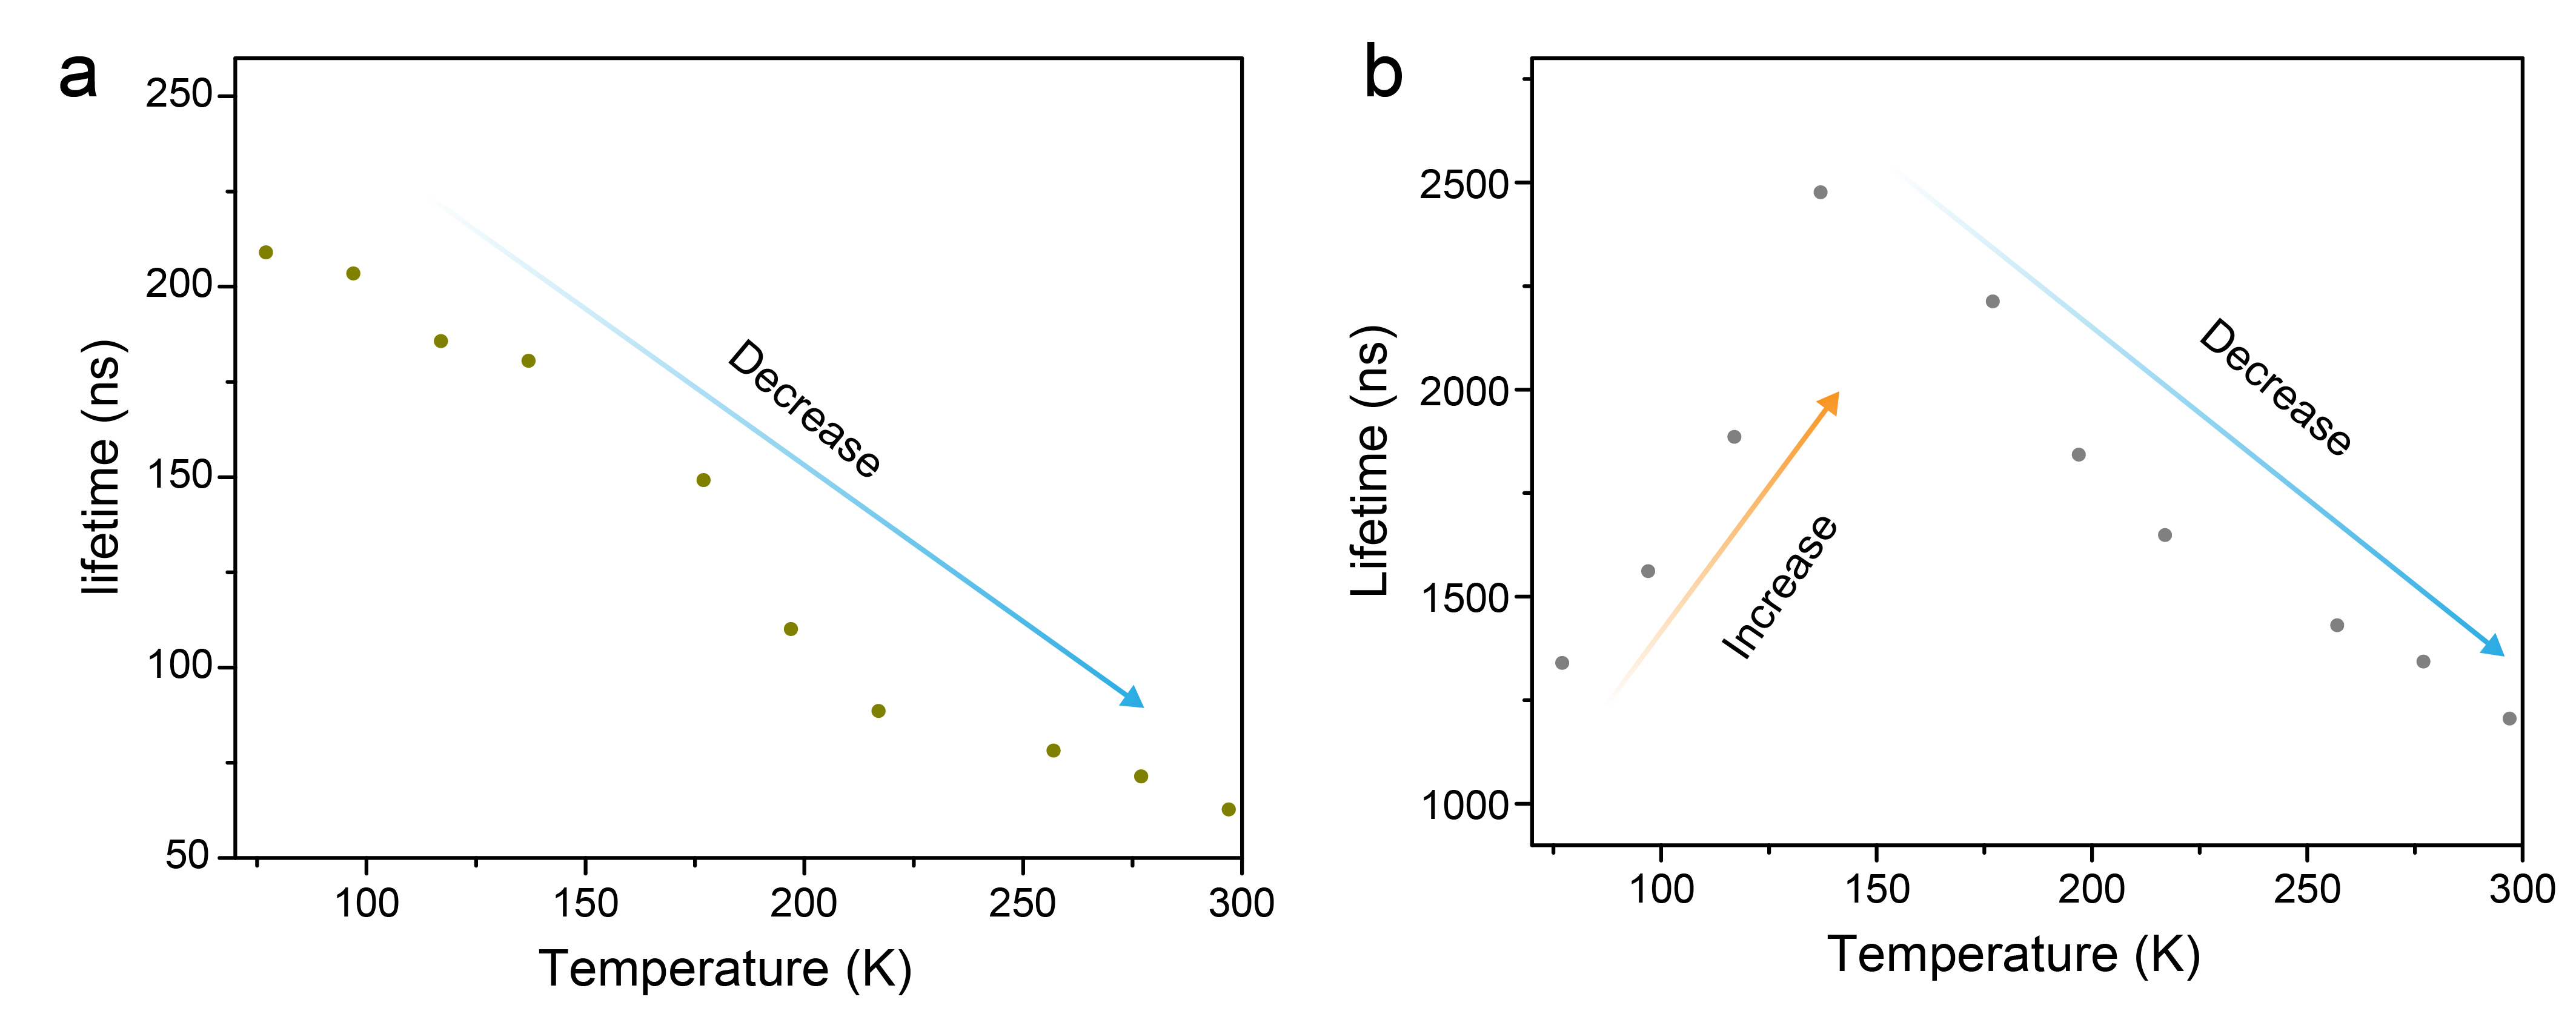


# Figure S17. (a) The temperature-dependent PL short lifetime and (b) long lifetime for the ZnO QDs.


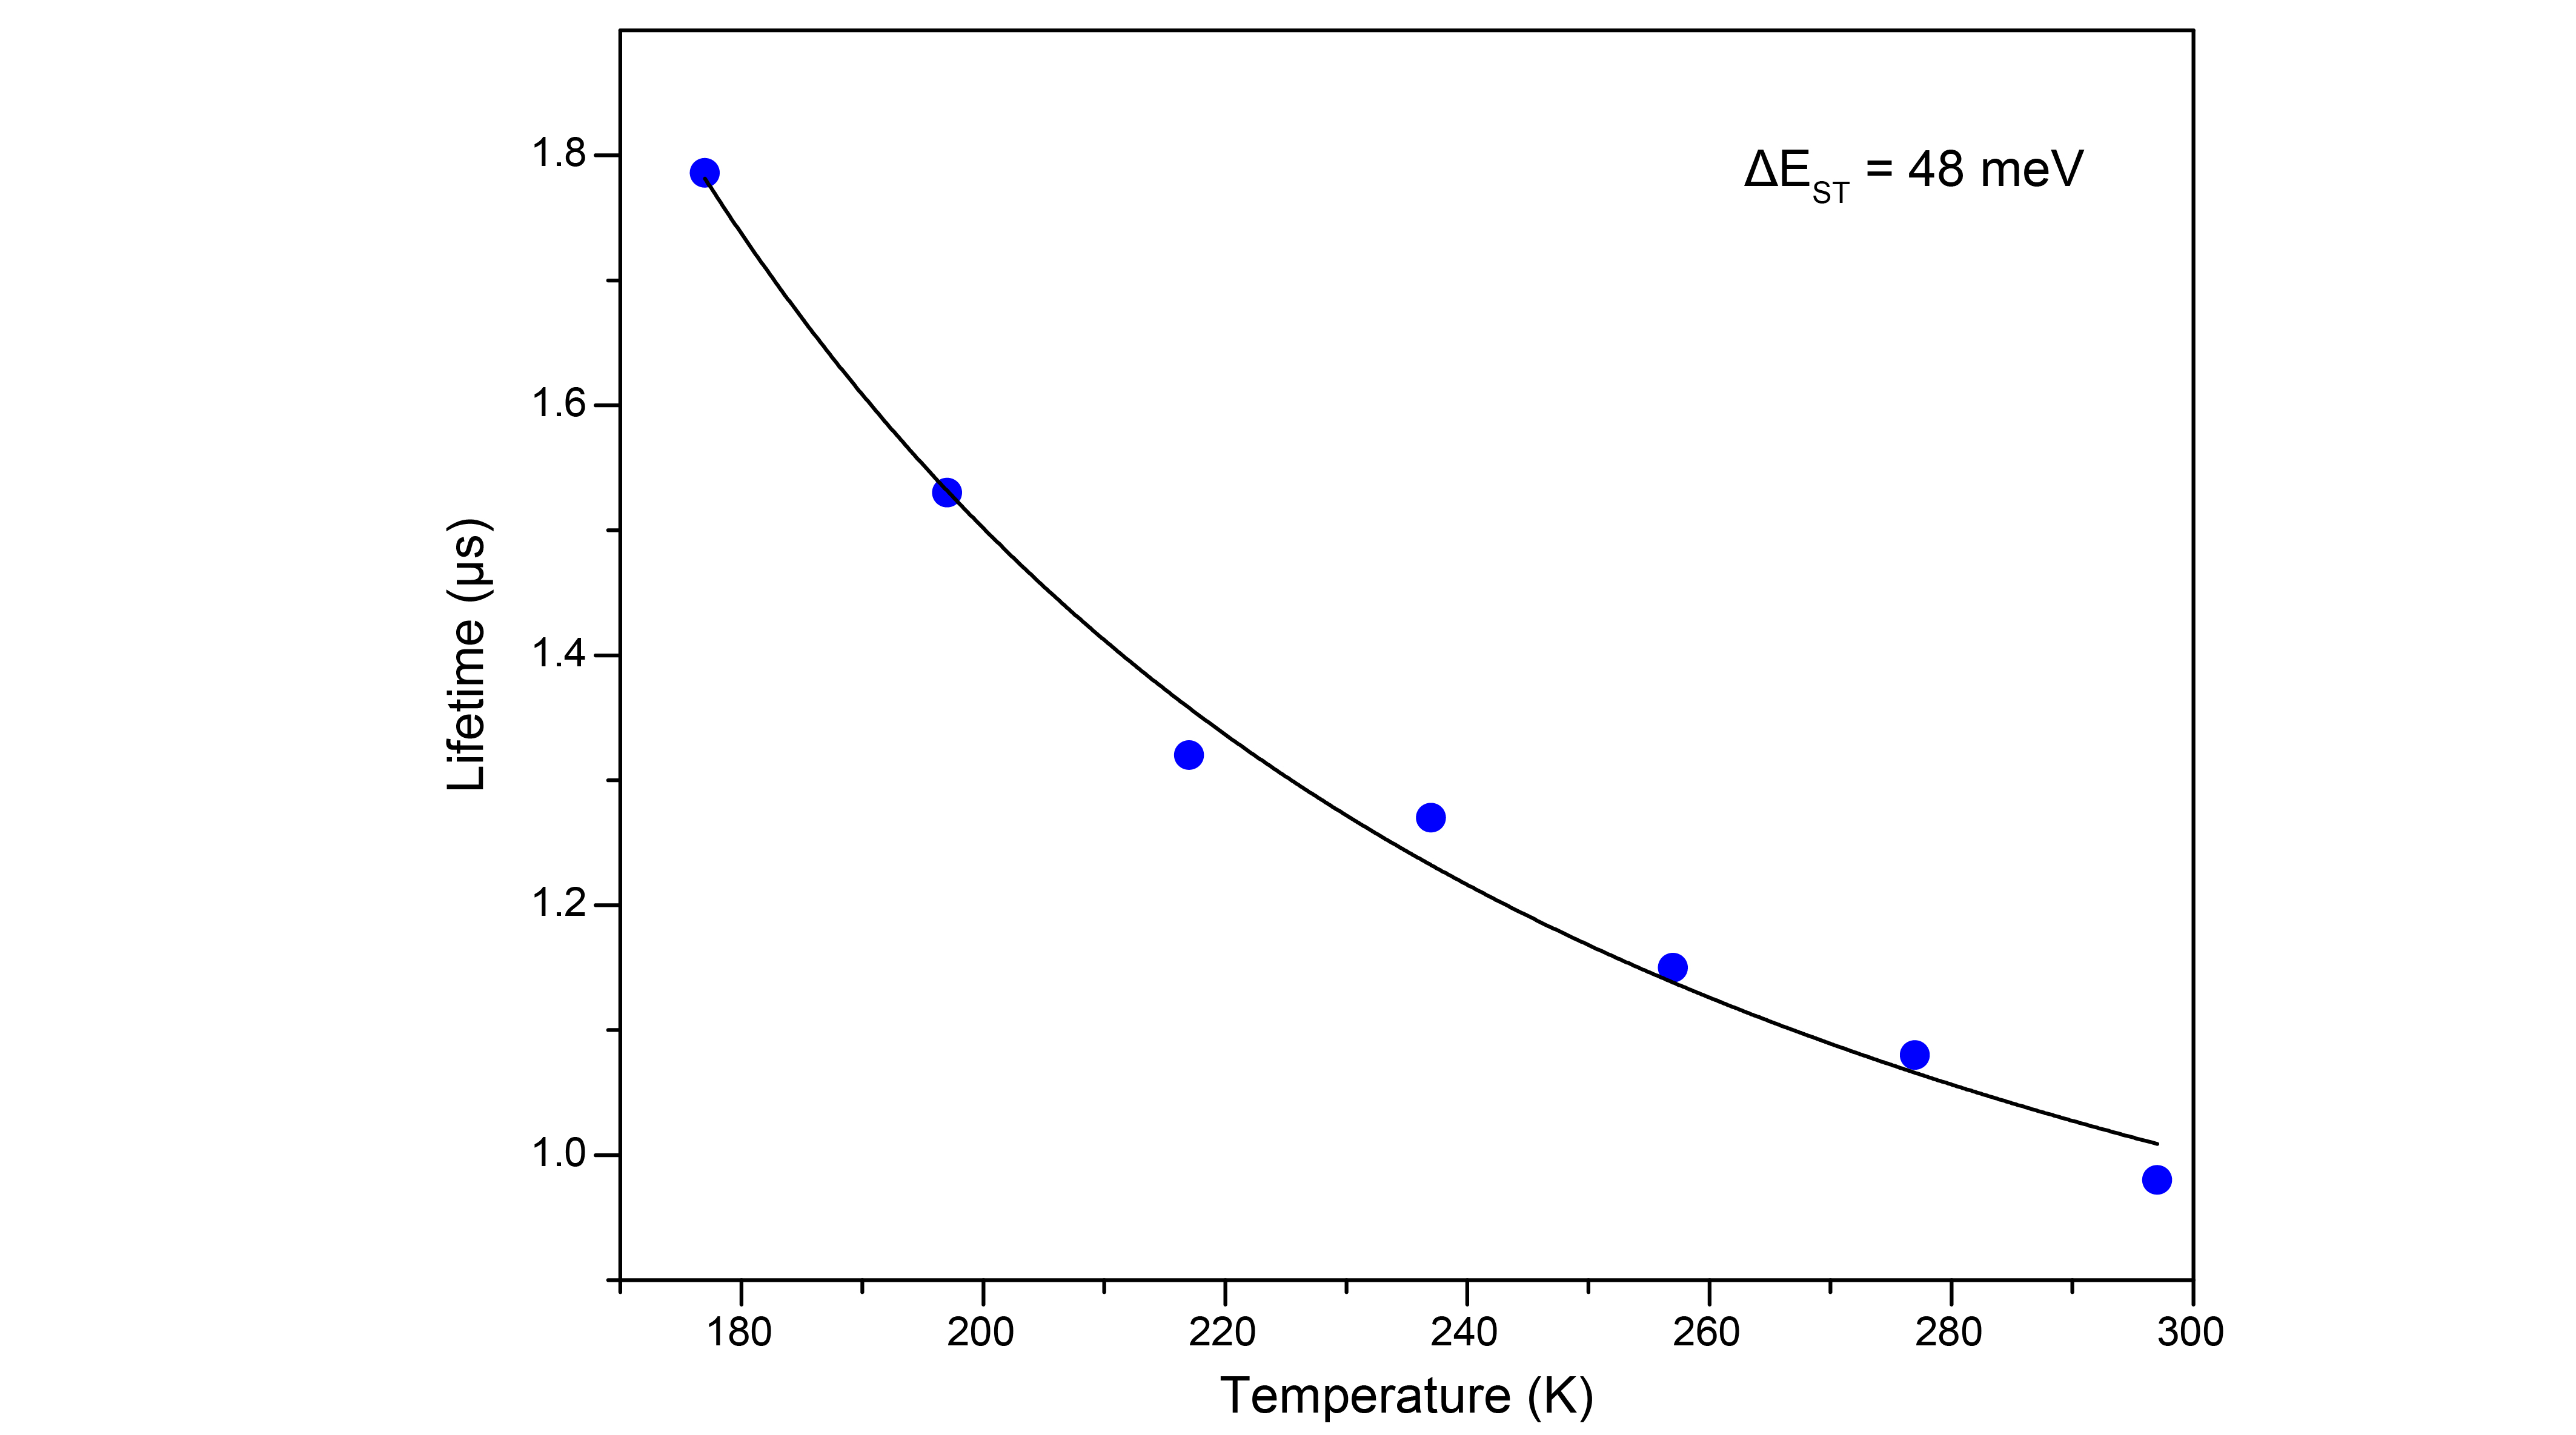


# Figure S18. Temperature-dependent average lifetimes of the ZnO QDs.


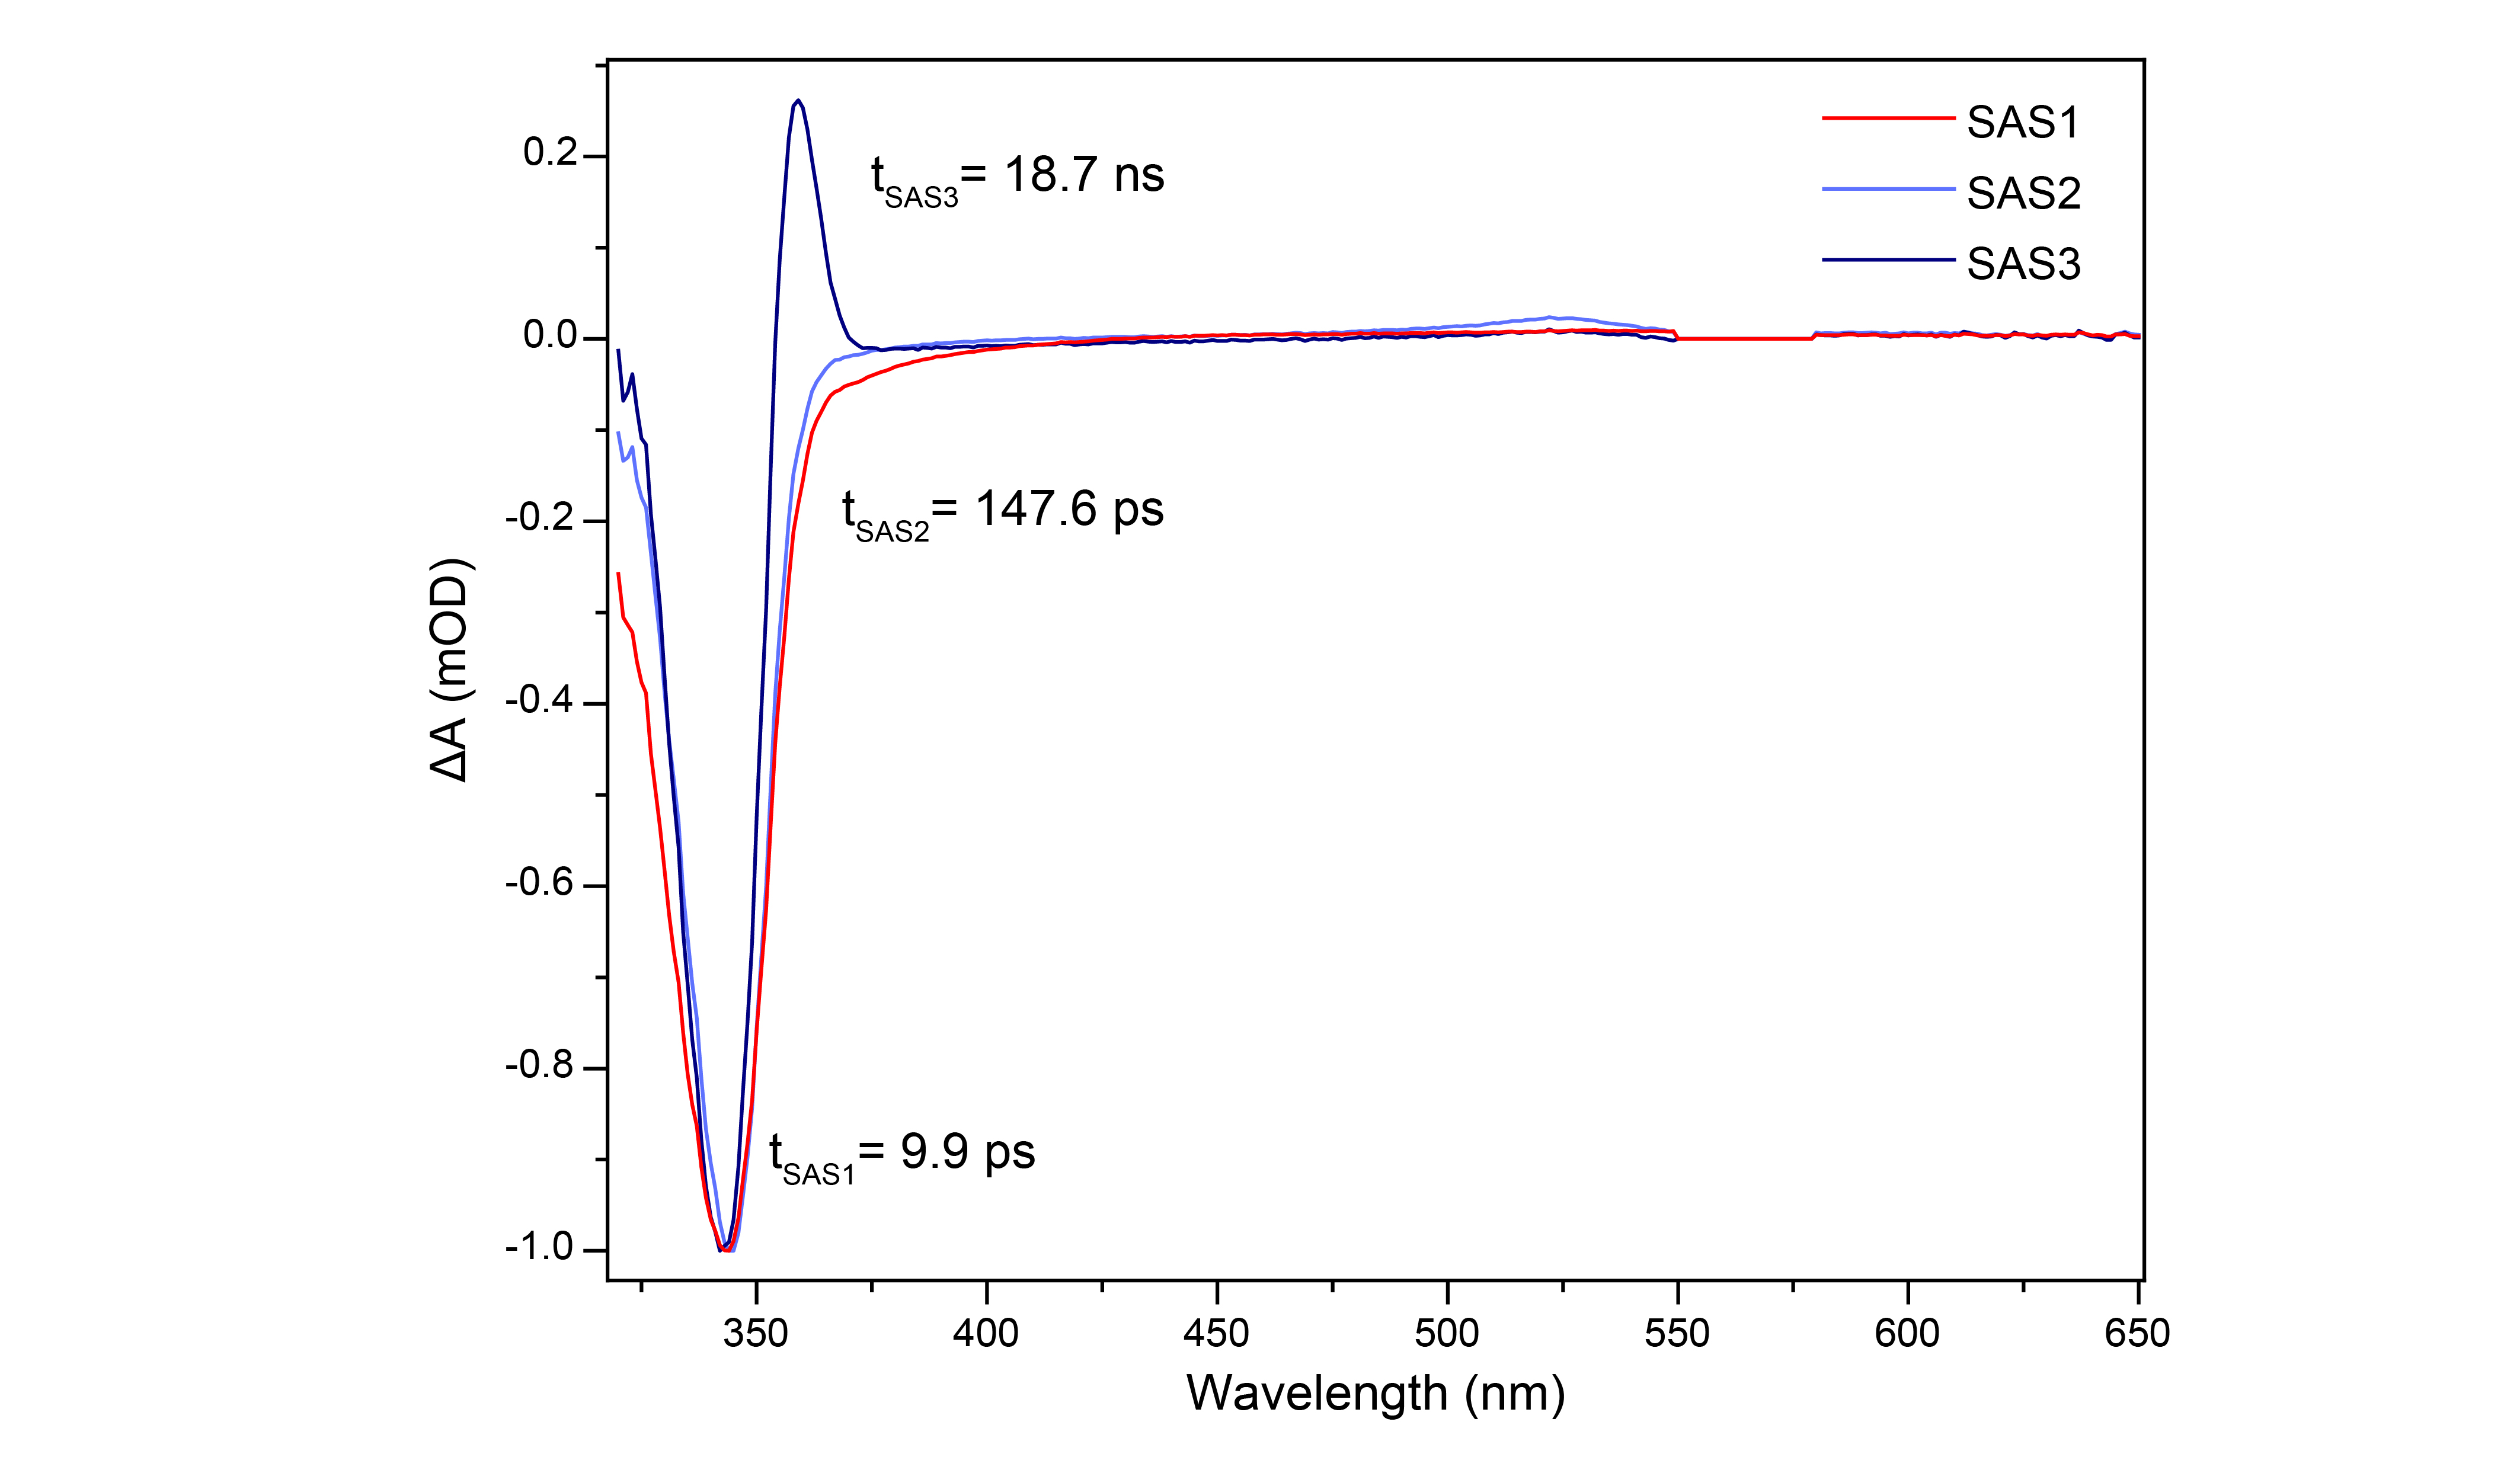


# Figure S19. Global analysis TA spectra of the ZnO QDs


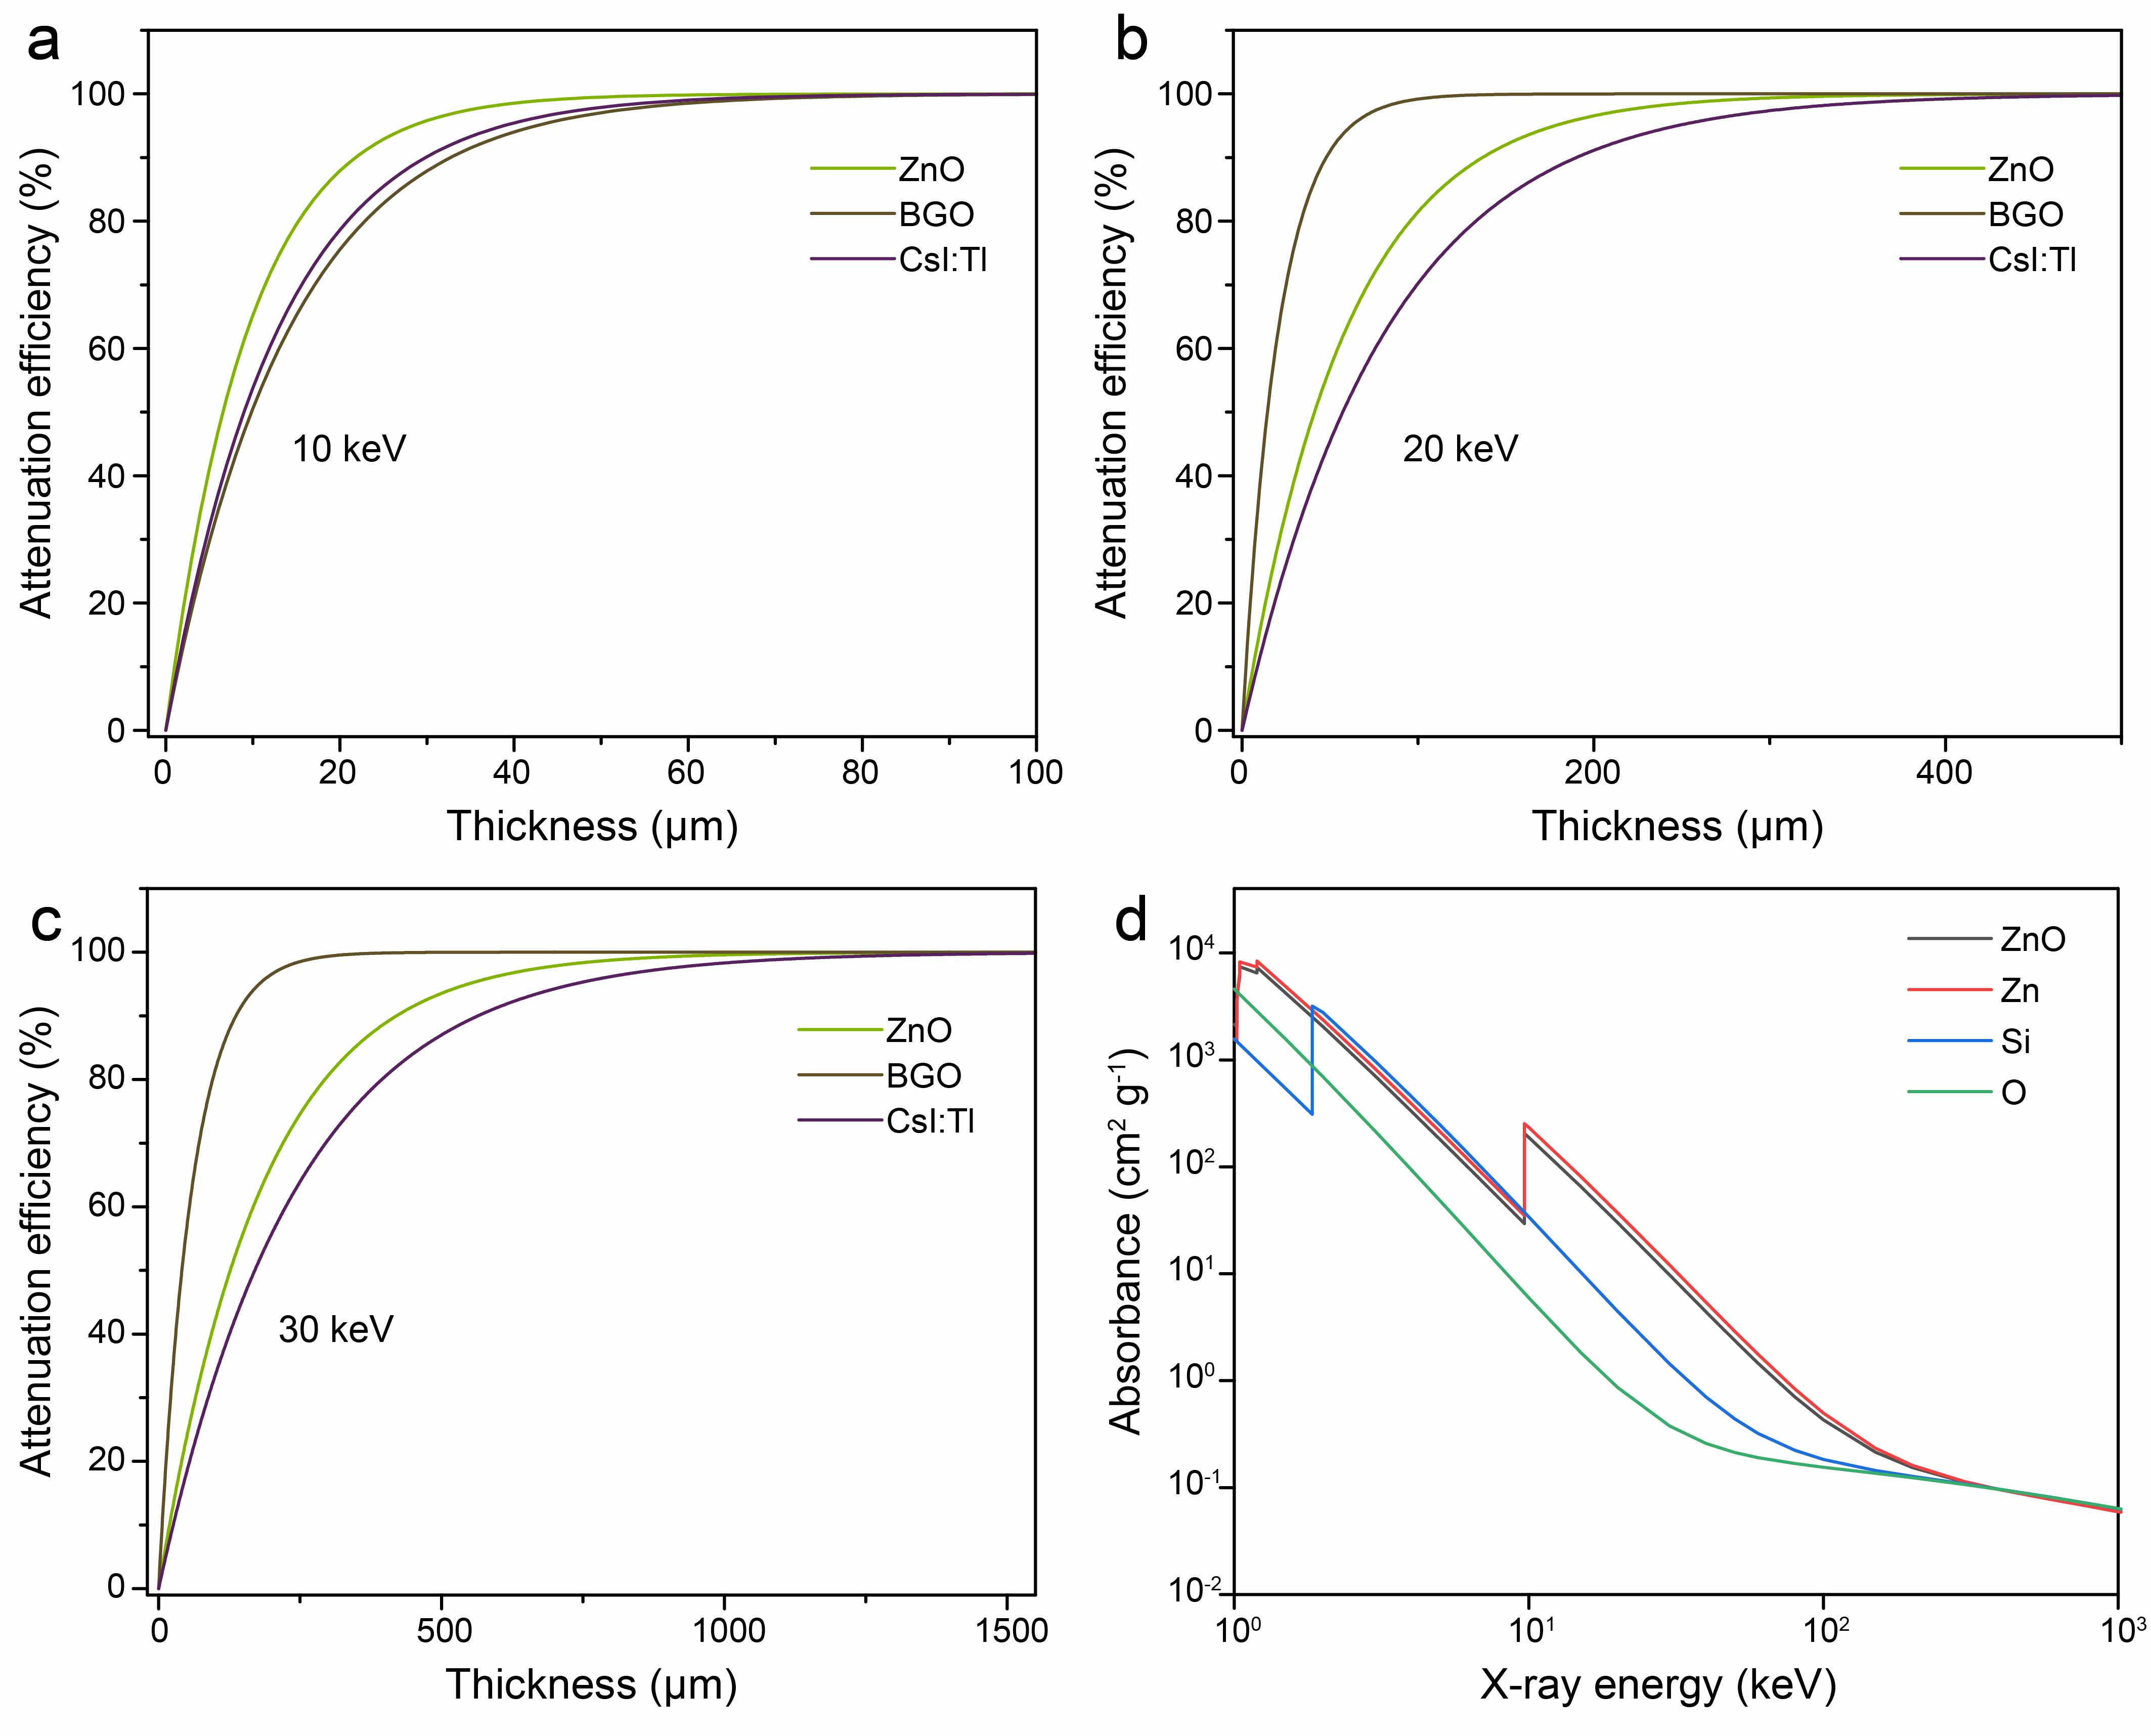


# Figure S20. (a-c) Calculated X-ray attenuation efficiencies of BGO, CsI:Tl and ZnO versus their thickness. (d) Absorption spectra of ZnO, Zn, Si and O as a function of X-ray energy. The attenuation coefficients were obtained from the photon cross-section database.


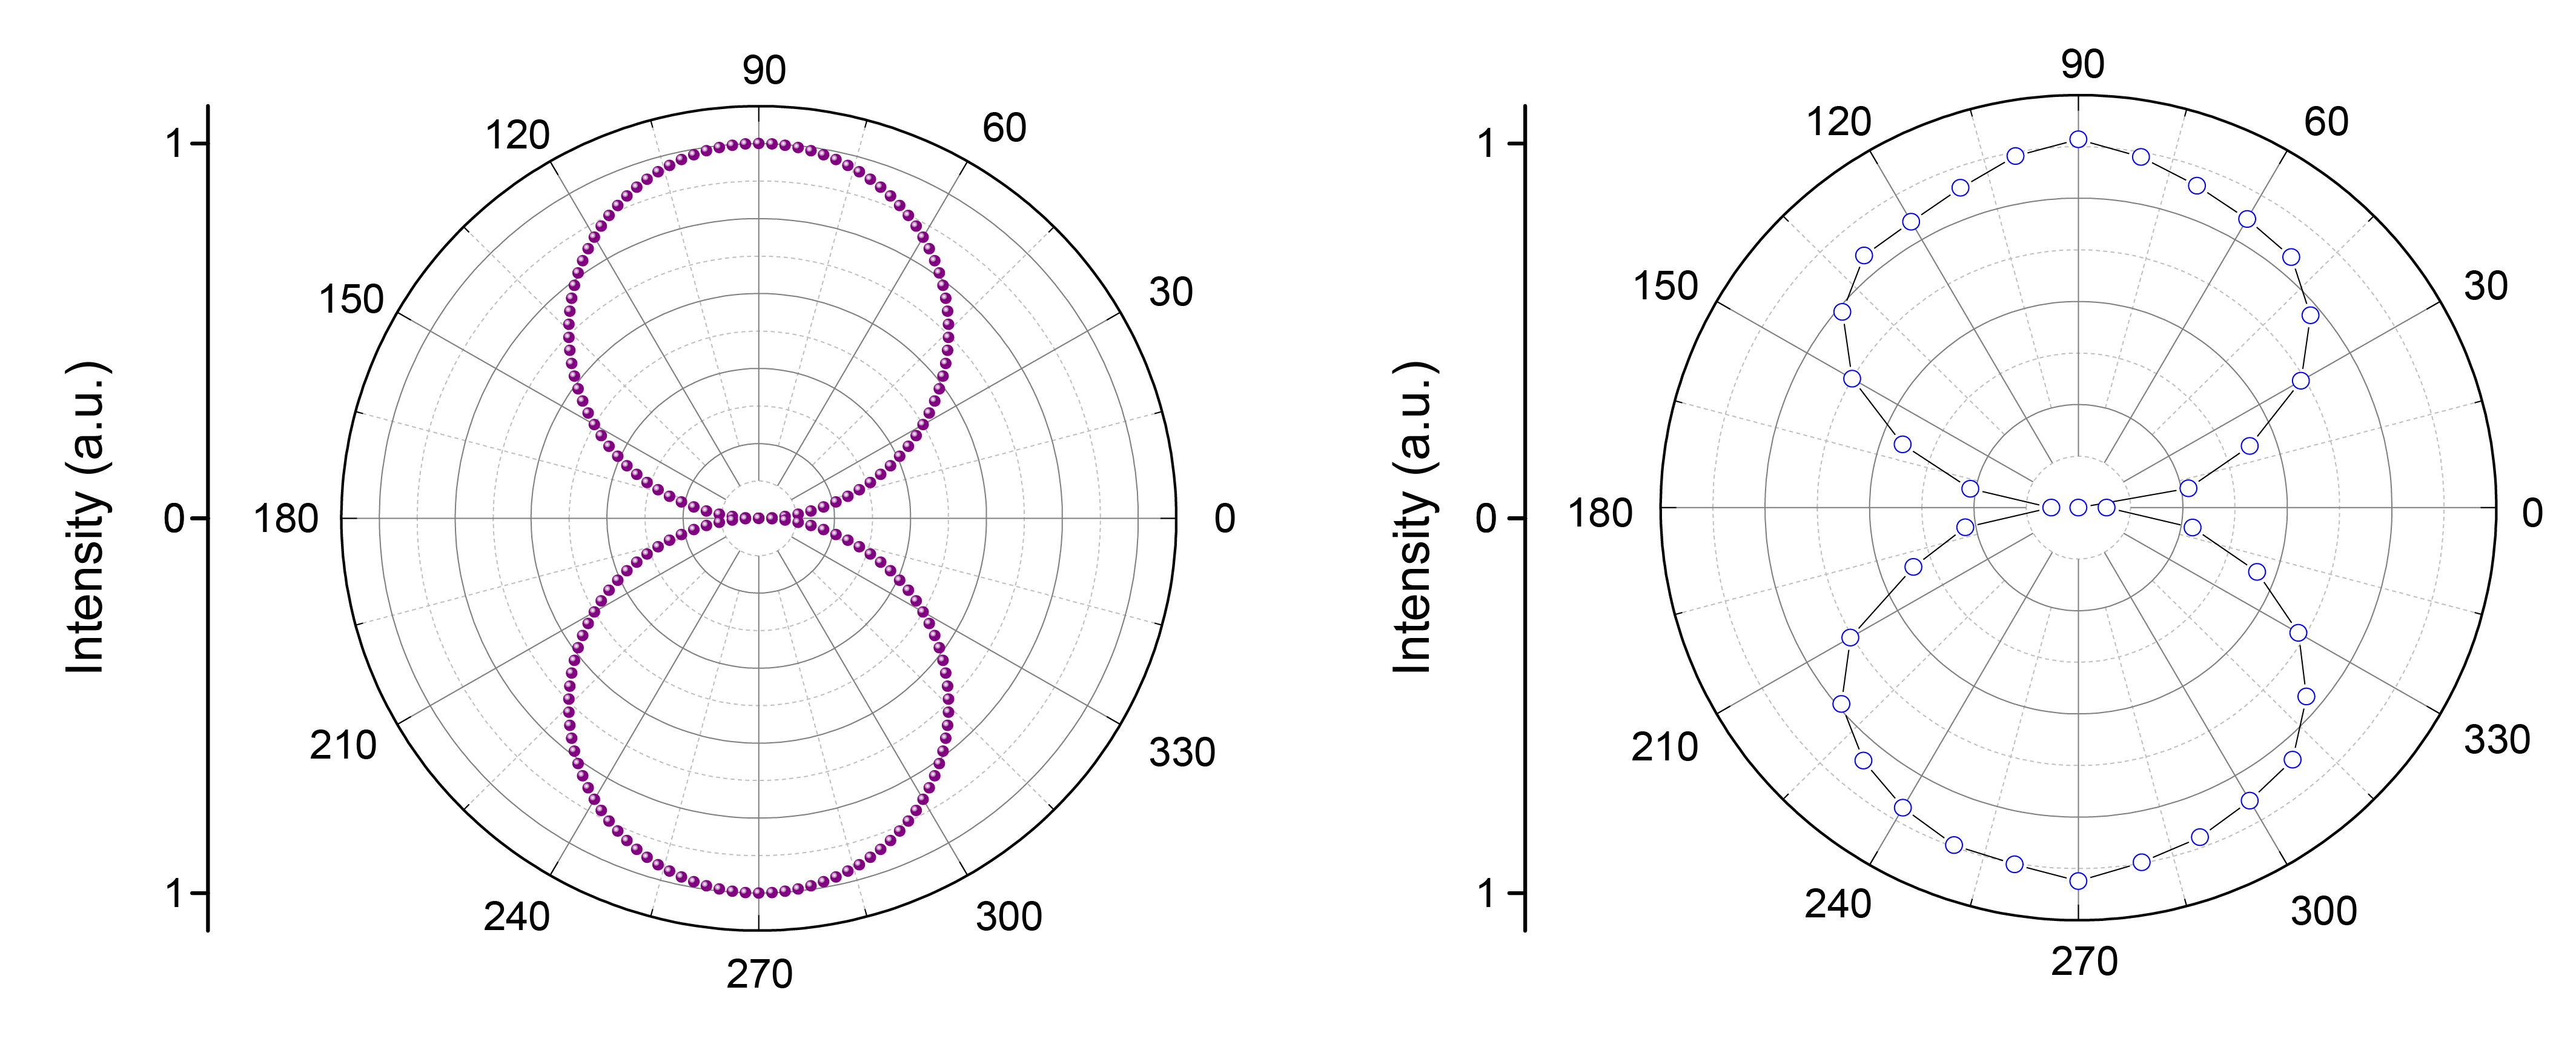


# Figure S21. Simulated light intensity in different directions at the same dose rate (left) and measured light intensity in different directions (right).


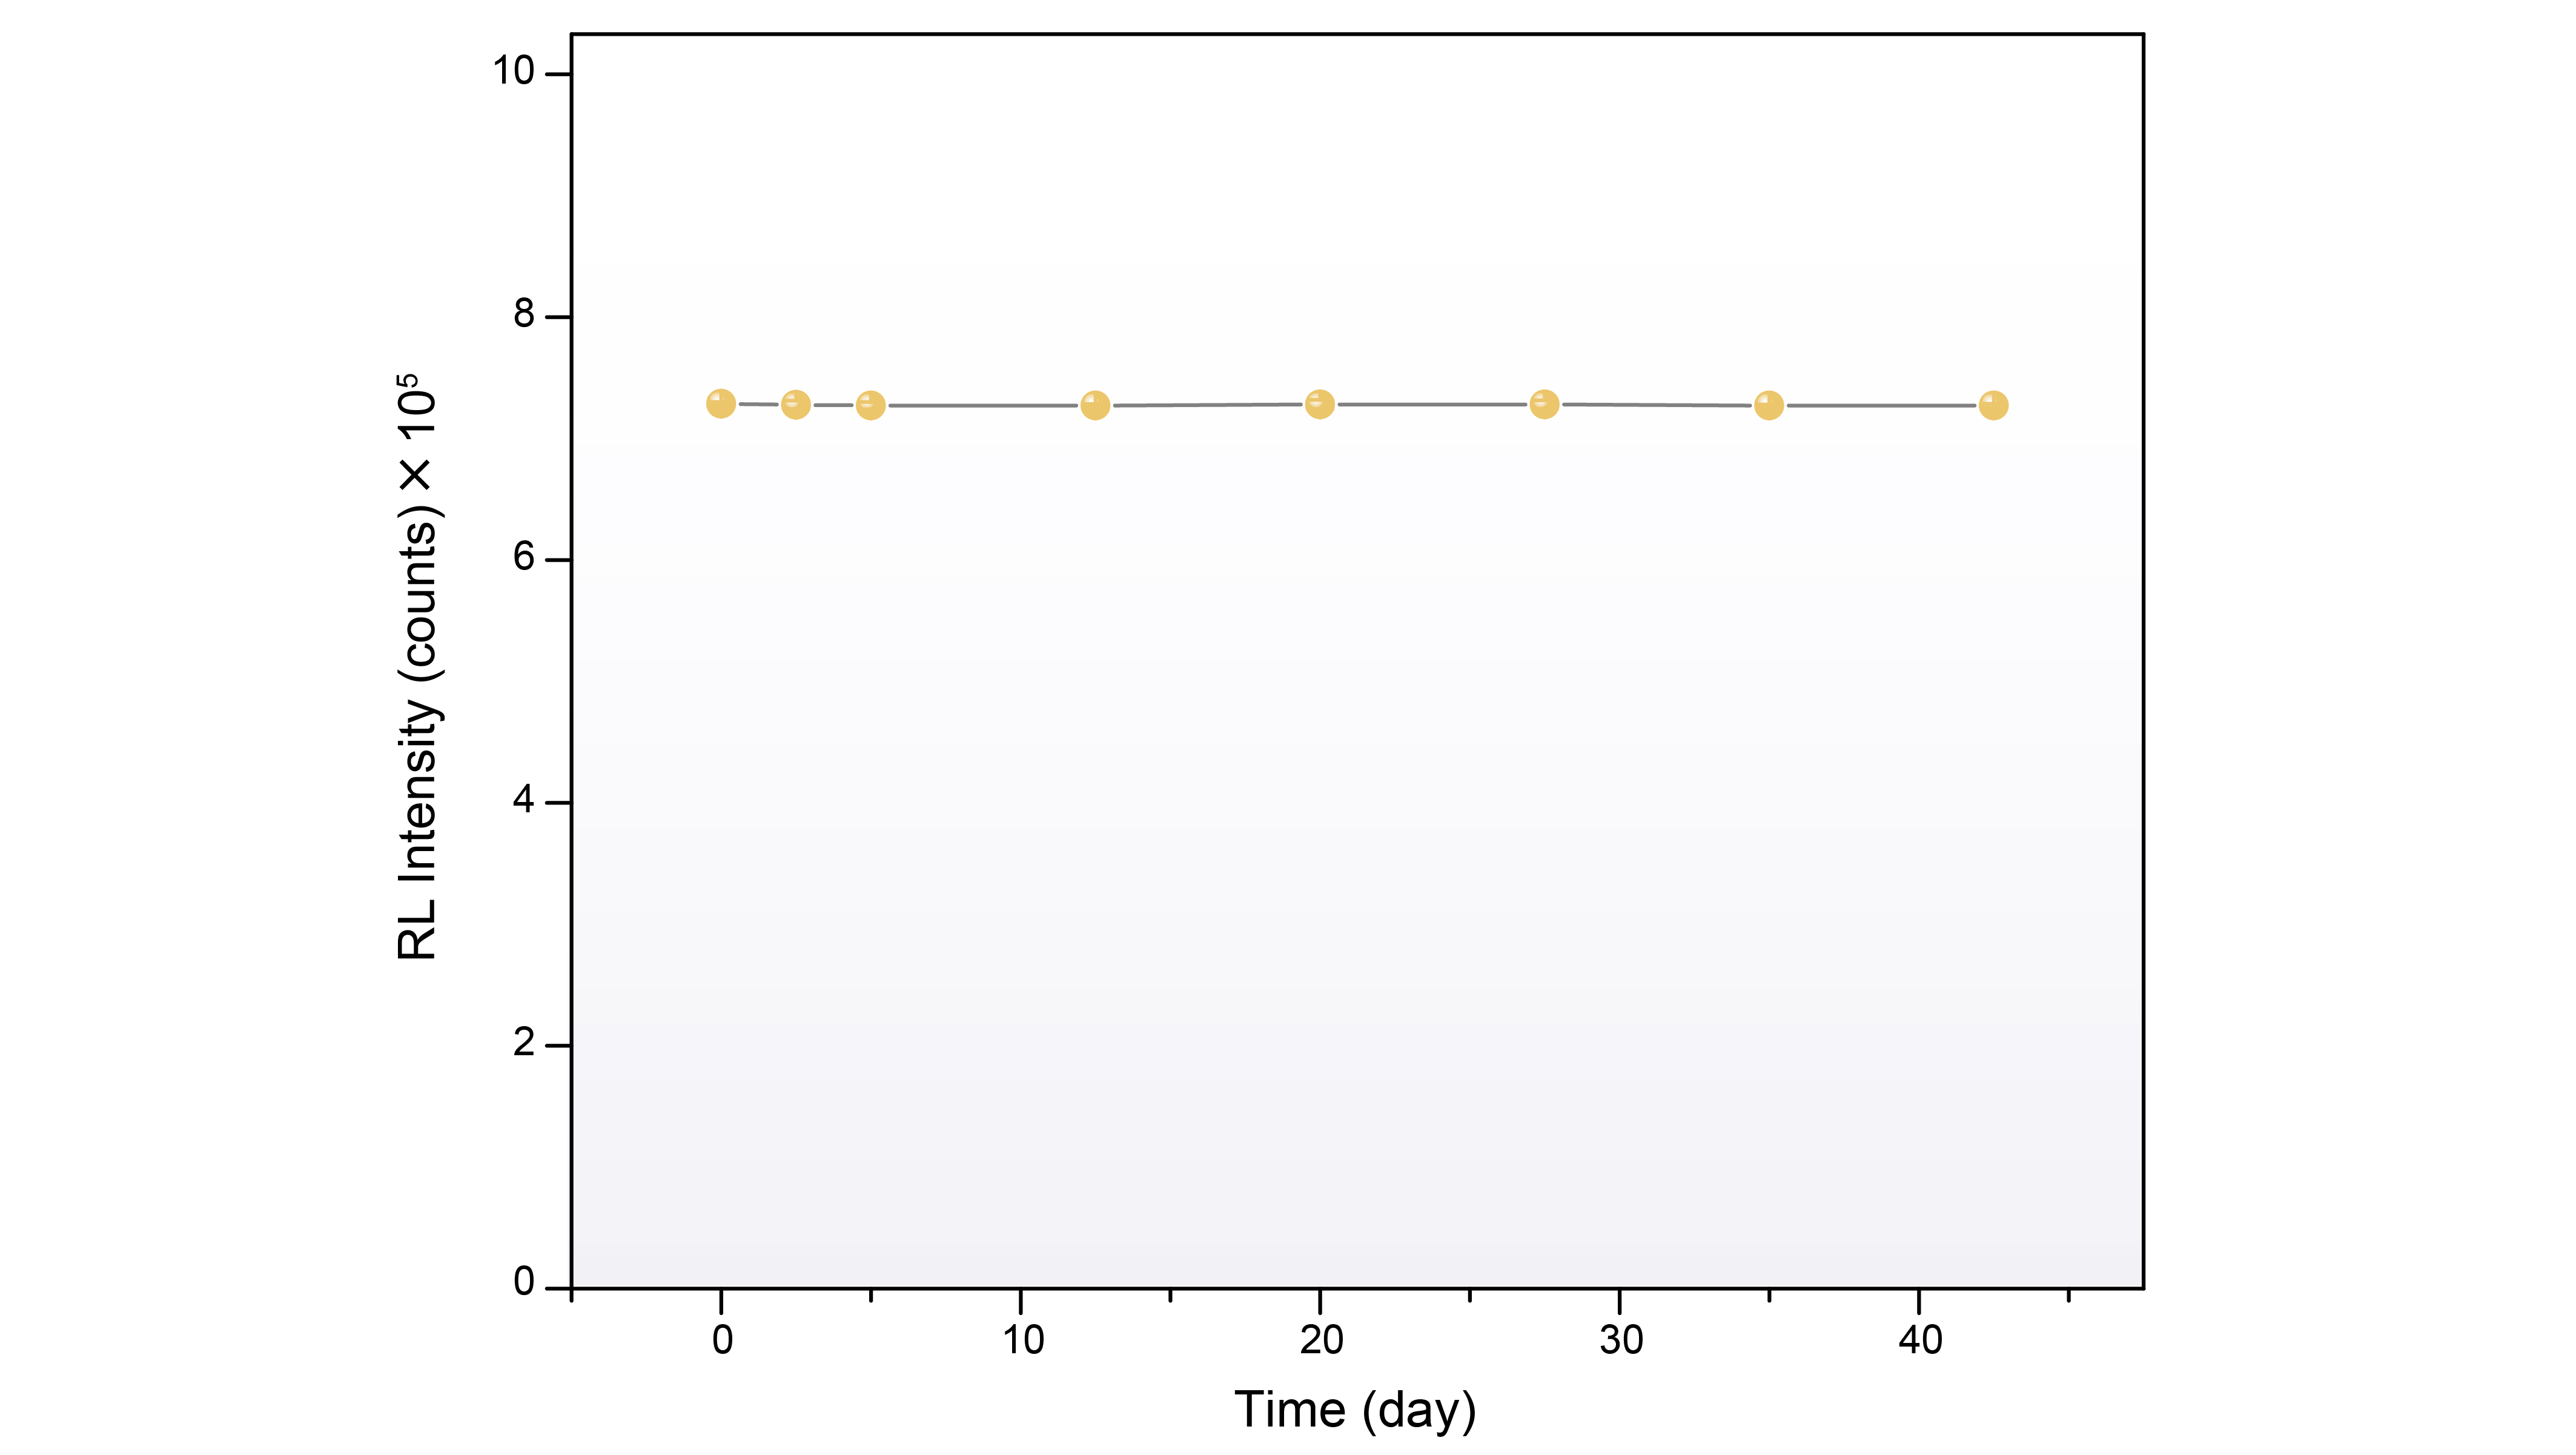


# Figure S22. RL stability of the ZnO QD vitreous scintillator under X-ray irradiation versus times.


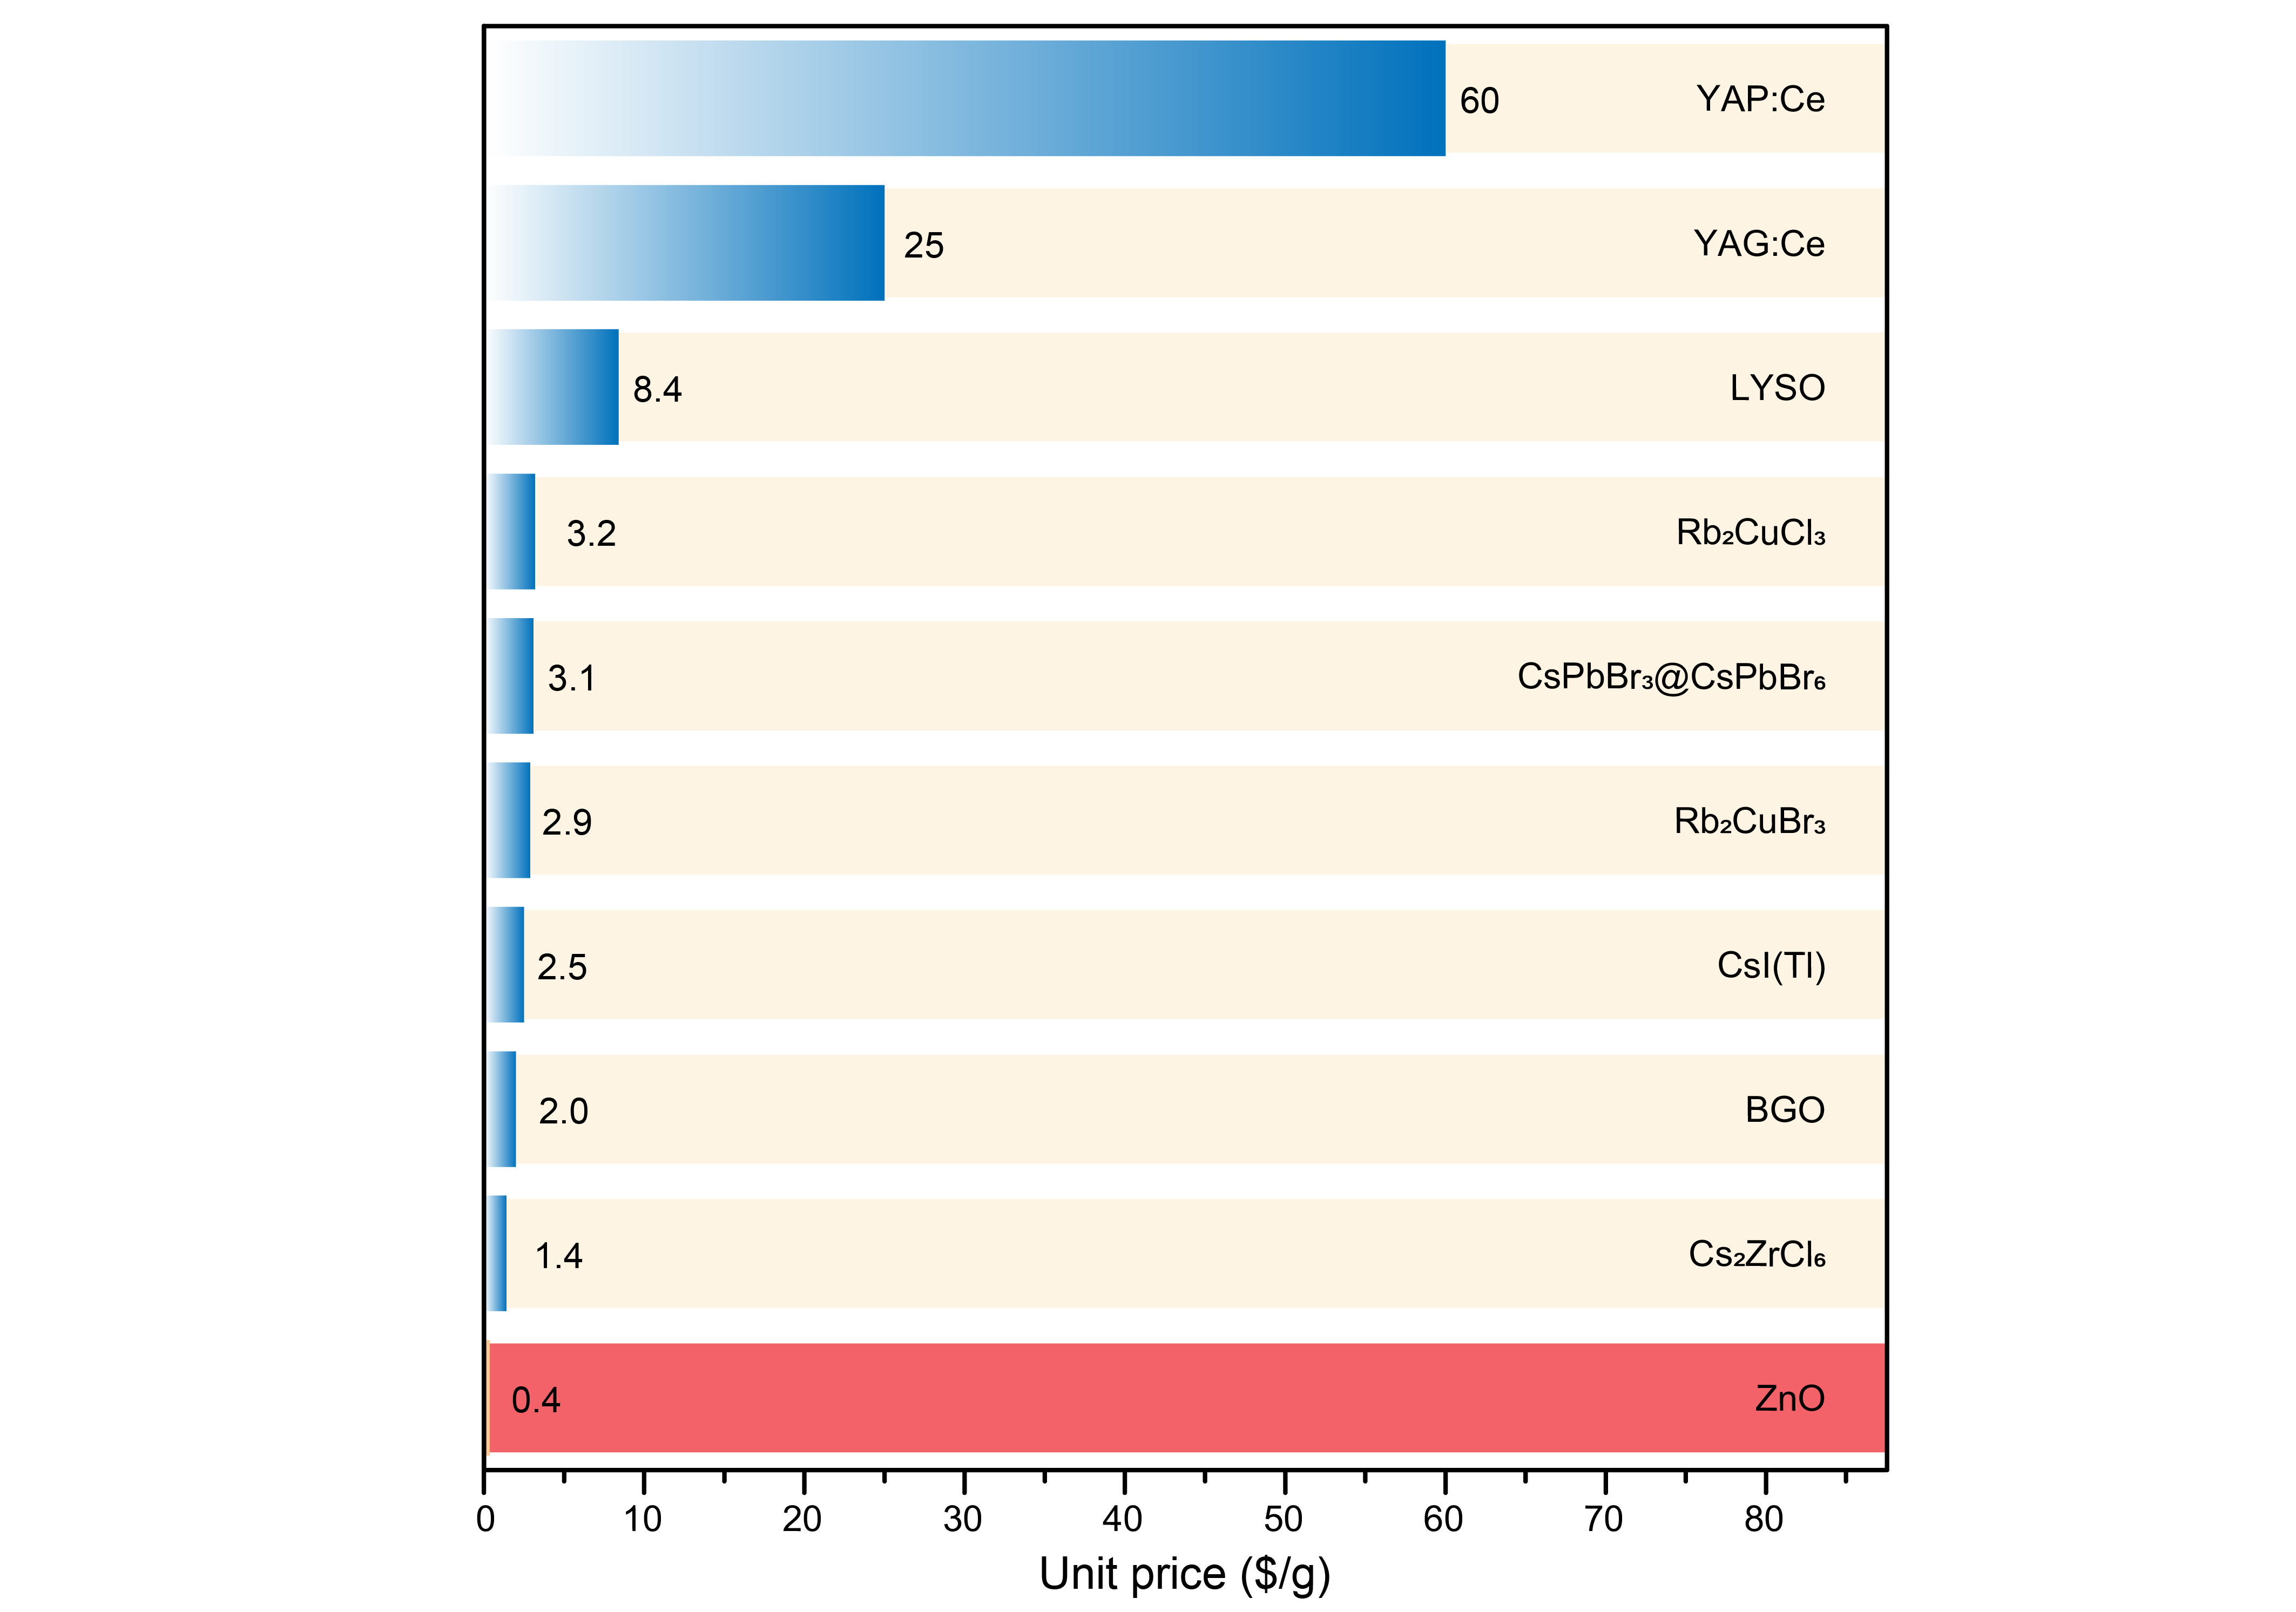


# Figure S23. Cost/price comparison of the ZnO QD and other scintillators.


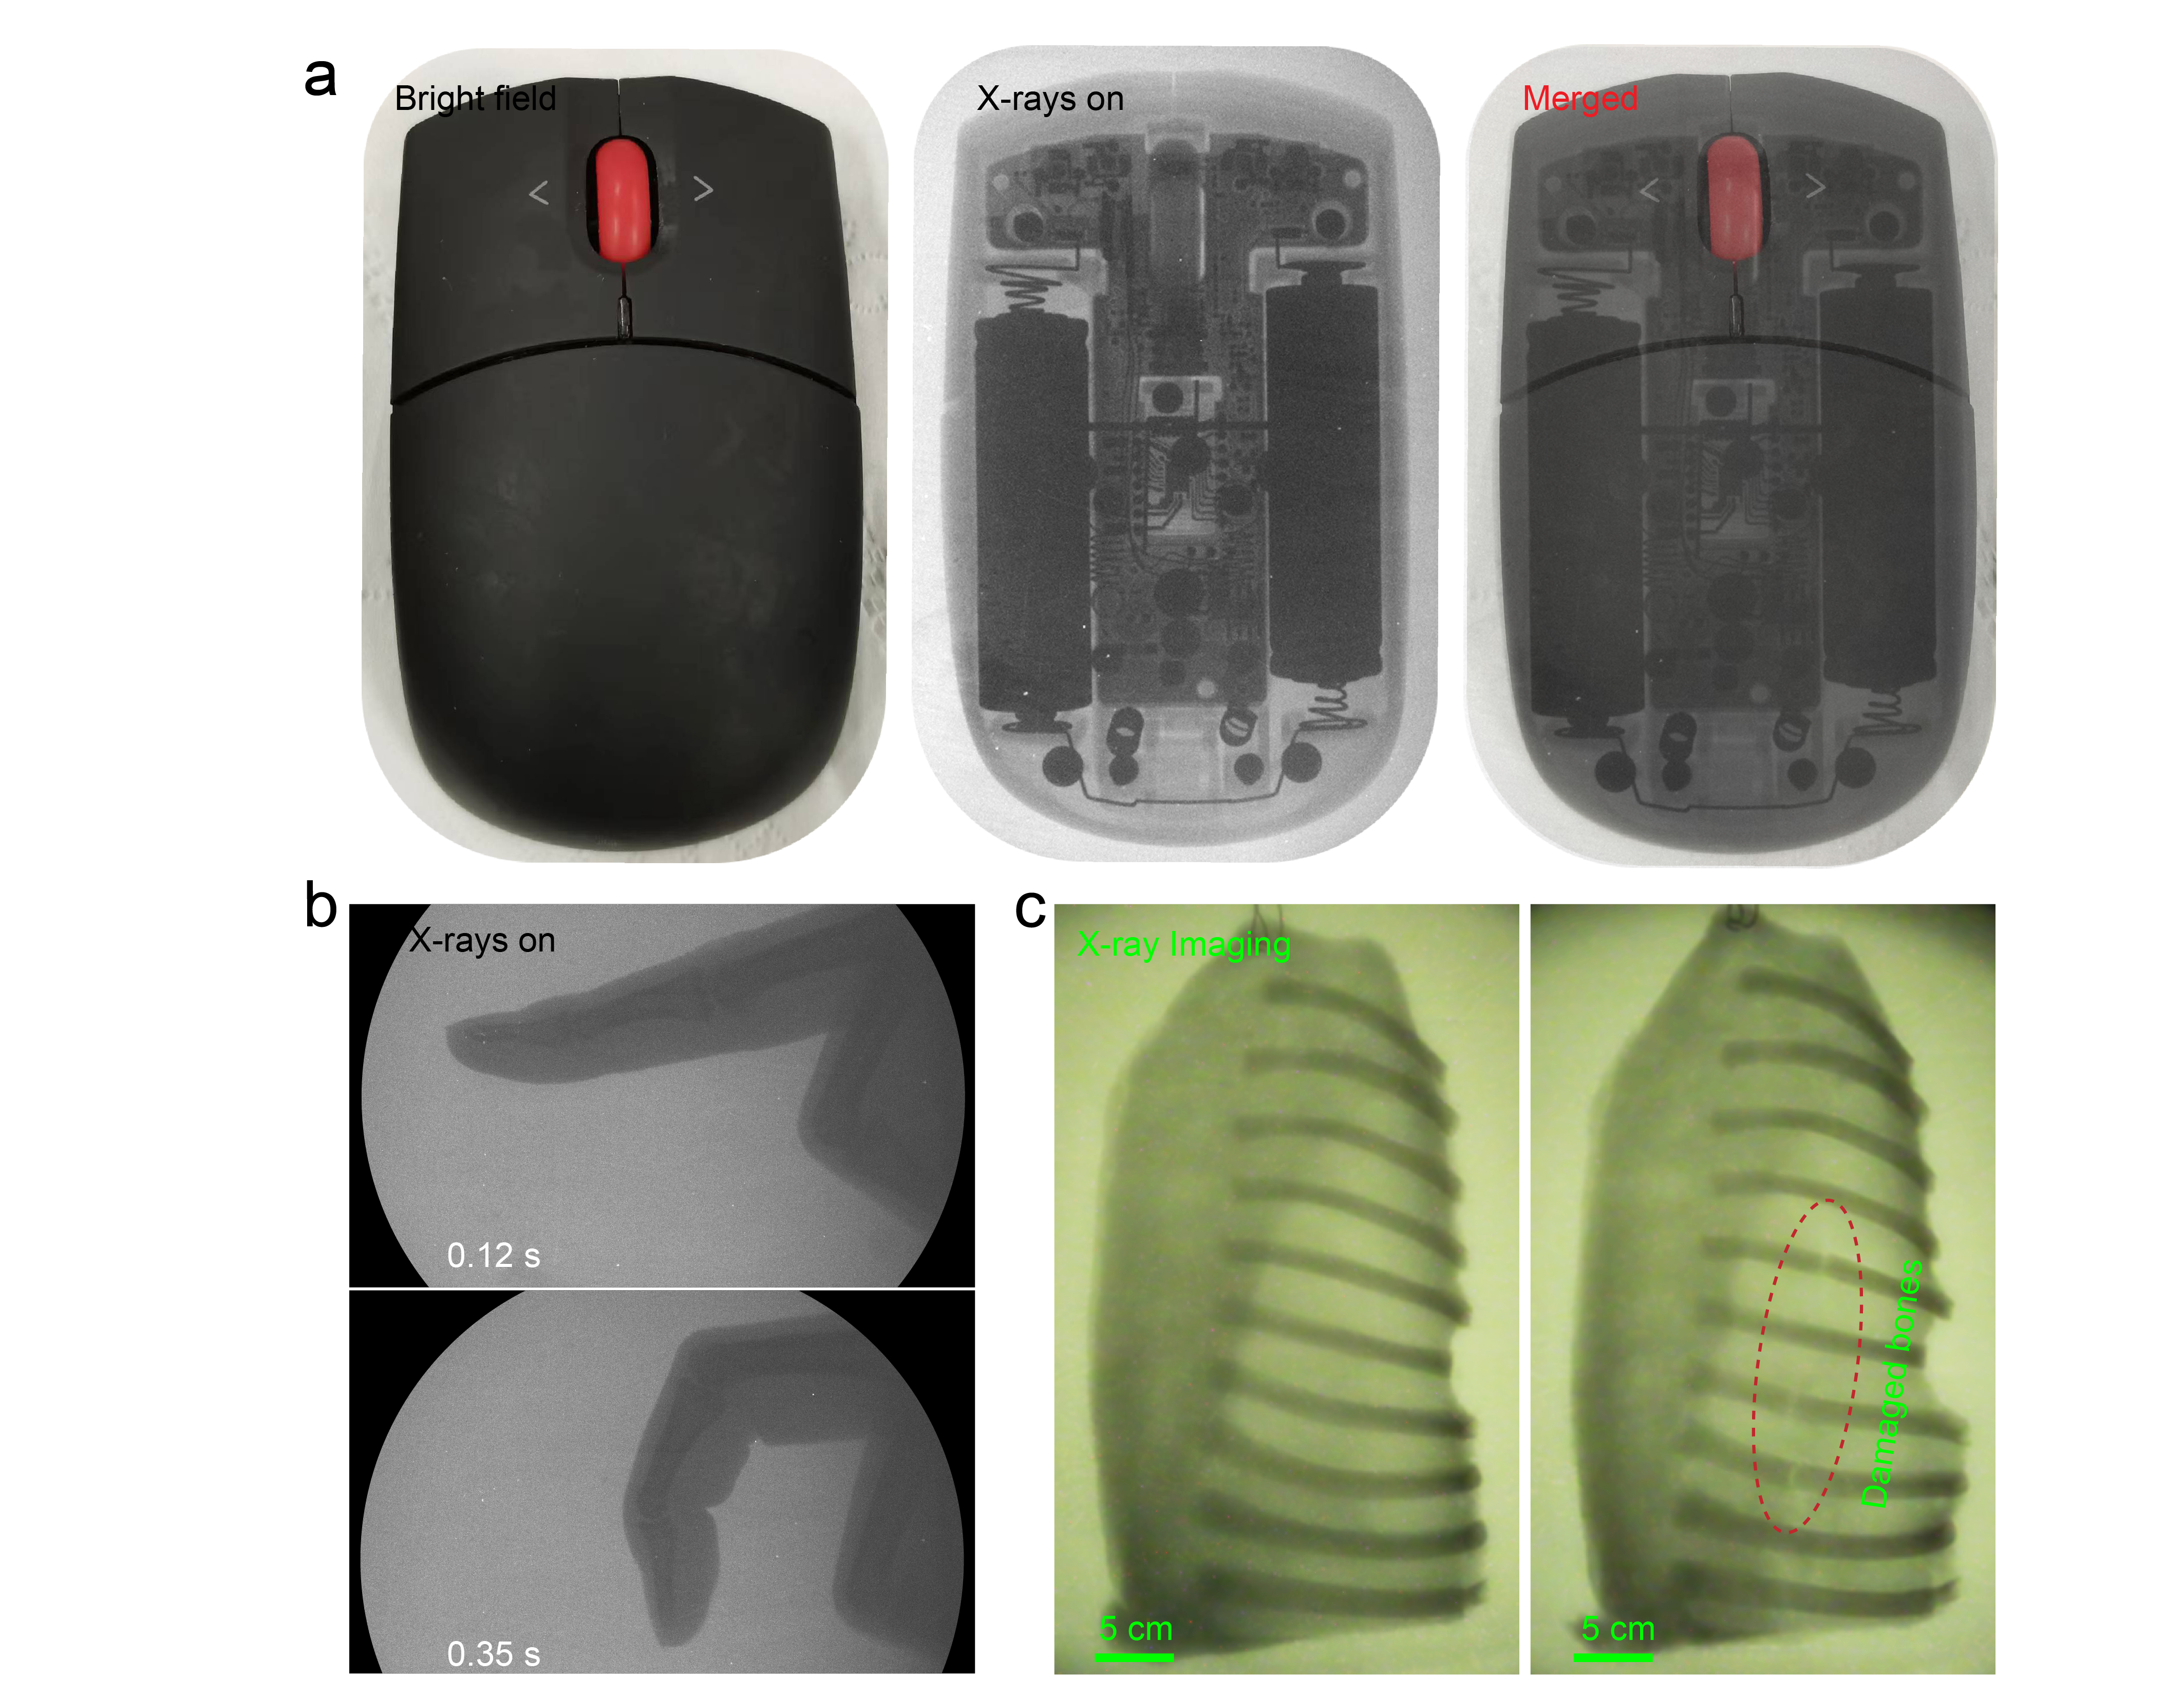


# Figure S24. (a) Digital photograph of a computer mouse and corresponding X-ray images obtained using ZnO QD vitreous scintillator (50 kV and 258 μGy s−1 exposure for 200 ms). (b) Real-time X-ray images of finger bending. (c)X-ray imaging of pork rib using the large area ZnO QD scintillator.
